# Supplementary material for: Drought stress-induced the formation of heteromorphic leaves of Populus euphratica Oliv: evidence from gene transcriptome
Source: Front Plant Sci. 2023 Jun 7;14:1194169. doi: 10.3389/fpls.2023.1194169 (PMC10282185; doi:10.3389/fpls.2023.1194169)
Supplement: Supplementary file 2 [file Table_1.xlsx]

## Sheet: datatable (1)
Supplementary Table S1 Transcriptome sequencing data statistics table
Sample name	Raw reads	Clean reads	clean bases	Error rate(%)	Q20(%)	Q30(%)	GC content(%)
SLL1	56371322	53589848	8.04G	0.03	95.48	88.81	44.23
SLL2	53465766	52140748	7.82G	0.03	95.97	89.71	44.15
SLL3	54073436	53251842	7.99G	0.03	95.89	89.51	43.96
MLL1	57194752	55739328	8.36G	0.03	96.02	89.84	43.49
MLL2	57396590	56404626	8.46G	0.03	95.23	88.31	44.17
MLL3	50107202	49194902	7.38G	0.03	96.01	89.74	43.21
LLL1	51108694	50322800	7.55G	0.03	96	89.68	44.25
LLL2	43594786	42516846	6.38G	0.03	96.36	90.46	44.37
LLL3	54192436	53575460	8.04G	0.03	95.94	89.57	44.04
MOL1	58785030	57768336	8.67G	0.03	96.09	89.89	44.23
MOL2	54924602	54174610	8.13G	0.03	96.07	89.79	44.14
MOL3	55146566	54407108	8.16G	0.03	96.51	90.82	44.31
LOL1	50289996	49400812	7.41G	0.03	95.58	88.93	44.19
LOL2	52340420	50759716	7.61G	0.03	95.93	89.64	44.13
LOL3	57766534	56587778	8.49G	0.03	95.23	88.3	44.02
LBL1	43900580	43076952	6.46G	0.03	96.12	90.01	44.21
LBL2	52271338	51556422	7.73G	0.03	96.33	90.85	44.28
LBL3	53814470	53054302	7.96G	0.03	95.76	89.22	44.09
