# Supplementary material for: Drought stress-induced the formation of heteromorphic leaves of Populus euphratica Oliv: evidence from gene transcriptome
Source: Front Plant Sci. 2023 Jun 7;14:1194169. doi: 10.3389/fpls.2023.1194169 (PMC10282185; doi:10.3389/fpls.2023.1194169)
Supplement: Supplementary file 3 [file Table_2.xlsx]

## Sheet: Supplementary Table S1
Supplementary Table S2 Reads vs. reference genome comparison table
Sample name	SLL1	SLL2	SLL3	MLL1	MLL2	MLL3	LLL1	LLL2	LLL3	MOL1	MOL2	MOL3	LOL1	LOL2	LOL3	LBL1	LBL2	LBL3
Total reads	53589848	52140748	53251842	55739328	56404626	49194902	50322800	42516846	53575460	57768336	54174610	54407108	49400812	50759716	56587778	43076952	51556422	53054302
Total mapped	48326545 (90.18%)	47825305 (91.72%)	48875151 (91.78%)	50949509 (91.41%)	51601587 (91.48%)	45062610 (91.6%)	46707169 (92.82%)	39351062 (92.55%)	49551399 (92.49%)	53625980 (92.83%)	50210183 (92.68%)	50503599 (92.83%)	45187853 (91.47%)	46670093 (91.94%)	51728915 (91.41%)	39600503 (91.93%)	47643532 (92.41%)	49077782 (92.5%)
Multiple mapped	3771768 (7.04%)	3555829 (6.82%)	3641012 (6.84%)	3480131 (6.24%)	3622847 (6.42%)	3179987 (6.46%)	3333366 (6.62%)	3125762 (7.35%)	3630472 (6.78%)	4144555 (7.17%)	3829109 (7.07%)	3940298 (7.24%)	3307608 (6.7%)	3431361 (6.76%)	3788665 (6.7%)	3140388 (7.29%)	3645187 (7.07%)	3651297 (6.88%)
Uniquely mapped	44554777 (83.14%)	44269476 (84.9%)	45234139 (84.94%)	47469378 (85.16%)	47978740 (85.06%)	41882623 (85.14%)	43373803 (86.19%)	36225300 (85.2%)	45920927 (85.71%)	49481425 (85.65%)	46381074 (85.61%)	46563301 (85.58%)	41880245 (84.78%)	43238732 (85.18%)	47940250 (84.72%)	36460115 (84.64%)	43998345 (85.34%)	45426485 (85.62%)
Read-1	22551276 (42.08%)	22328991 (42.82%)	22839745 (42.89%)	23904198 (42.89%)	24467014 (43.38%)	21089882 (42.87%)	21875976 (43.47%)	18184913 (42.77%)	23184683 (43.27%)	24925379 (43.15%)	23307448 (43.02%)	23441484 (43.09%)	21204604 (42.92%)	21786760 (42.92%)	24409008 (43.13%)	18337912 (42.57%)	22221822 (43.1%)	23013845 (43.38%)
Read-2	22003501 (41.06%)	21940485 (42.08%)	22394394 (42.05%)	23565180 (42.28%)	23511726 (41.68%)	20792741 (42.27%)	21497827 (42.72%)	18040387 (42.43%)	22736244 (42.44%)	24556046 (42.51%)	23073626 (42.59%)	23121817 (42.5%)	20675641 (41.85%)	21451972 (42.26%)	23531242 (41.58%)	18122203 (42.07%)	21776523 (42.24%)	22412640 (42.24%)
Reads map to '+'	22242551 (41.51%)	22098387 (42.38%)	22581972 (42.41%)	23690567 (42.5%)	23937842 (42.44%)	20910328 (42.51%)	21654283 (43.03%)	18087565 (42.54%)	22925726 (42.79%)	24701943 (42.76%)	23153825 (42.74%)	23250607 (42.73%)	20903490 (42.31%)	21577032 (42.51%)	23922251 (42.27%)	18203796 (42.26%)	21962591 (42.6%)	22677141 (42.74%)
Reads map to '-'	22312226 (41.64%)	22171089 (42.52%)	22652167 (42.54%)	23778811 (42.66%)	24040898 (42.62%)	20972295 (42.63%)	21719520 (43.16%)	18137735 (42.66%)	22995201 (42.92%)	24779482 (42.89%)	23227249 (42.87%)	23312694 (42.85%)	20976755 (42.46%)	21661700 (42.67%)	24017999 (42.44%)	18256319 (42.38%)	22035754 (42.74%)	22749344 (42.88%)
