# Supplementary material for: Drought stress-induced the formation of heteromorphic leaves of Populus euphratica Oliv: evidence from gene transcriptome
Source: Front Plant Sci. 2023 Jun 7;14:1194169. doi: 10.3389/fpls.2023.1194169 (PMC10282185; doi:10.3389/fpls.2023.1194169)
Supplement: Supplementary file 4 [file Table_3.xlsx]

## Sheet: lanceolate vs ovate.GO
Supplementary Table S3 GO enrichment list for differentially expressed genes
GO_accession	Description	Term_type	Over_represented_pValue	Corrected_pValue	DEG_item	DEG_list	Bg_item	Bg_list
GO:0006629	lipid metabolic process	biological_process	1.5276e-05	0.070759	9	36	1106	25884
GO:0044710	single-organism metabolic process	biological_process	6.8797e-05	0.15933	18	36	5257	25884
GO:0044711	single-organism biosynthetic process	biological_process	0.00017323	0.25476	9	36	1509	25884
GO:0016616	oxidoreductase activity, acting on the CH-OH group of donors, NAD or NADP as acceptor	molecular_function	0.00022	0.25476	5	36	403	25884
GO:0016614	oxidoreductase activity, acting on CH-OH group of donors	molecular_function	0.00033296	0.30846	5	36	441	25884
GO:0044036	cell wall macromolecule metabolic process	biological_process	0.00055113	0.42547	2	36	25	25884
GO:0005992	trehalose biosynthetic process	biological_process	0.00080876	0.47295	2	36	30	25884
GO:0034637	cellular carbohydrate biosynthetic process	biological_process	0.00088413	0.47295	3	36	131	25884
GO:0046351	disaccharide biosynthetic process	biological_process	0.00091894	0.47295	2	36	32	25884
GO:0005991	trehalose metabolic process	biological_process	0.0012238	0.5055	2	36	37	25884
GO:0008610	lipid biosynthetic process	biological_process	0.0012716	0.5055	5	36	590	25884
GO:0003854	3-beta-hydroxy-delta5-steroid dehydrogenase activity	molecular_function	0.0016154	0.5055	3	36	169	25884
GO:0016229	steroid dehydrogenase activity	molecular_function	0.0016154	0.5055	3	36	169	25884
GO:0033764	steroid dehydrogenase activity, acting on the CH-OH group of donors, NAD or NADP as acceptor	molecular_function	0.0016154	0.5055	3	36	169	25884
GO:0055114	oxidation-reduction process	biological_process	0.001637	0.5055	10	36	2500	25884
GO:0006694	steroid biosynthetic process	biological_process	0.0019076	0.54485	3	36	179	25884
GO:0008202	steroid metabolic process	biological_process	0.0019997	0.54485	3	36	182	25884
GO:0016491	oxidoreductase activity	molecular_function	0.002504	0.62423	10	36	2647	25884
GO:0005984	disaccharide metabolic process	biological_process	0.0026192	0.62423	2	36	54	25884
GO:0004799	thymidylate synthase activity	molecular_function	0.0027606	0.62423	1	36	2	25884
GO:0044262	cellular carbohydrate metabolic process	biological_process	0.0033596	0.62423	3	36	212	25884
GO:0006631	fatty acid metabolic process	biological_process	0.0038025	0.62423	3	36	226	25884
GO:0006545	glycine biosynthetic process	biological_process	0.0041351	0.62423	1	36	3	25884
GO:0006231	dTMP biosynthetic process	biological_process	0.004148	0.62423	1	36	3	25884
GO:0042083	5,10-methylenetetrahydrofolate-dependent methyltransferase activity	molecular_function	0.004148	0.62423	1	36	3	25884
GO:0046073	dTMP metabolic process	biological_process	0.004148	0.62423	1	36	3	25884
GO:0016051	carbohydrate biosynthetic process	biological_process	0.0041797	0.62423	3	36	229	25884
GO:0003857	3-hydroxyacyl-CoA dehydrogenase activity	molecular_function	0.0049522	0.62423	2	36	76	25884
GO:0050662	coenzyme binding	molecular_function	0.0053824	0.62423	5	36	829	25884
GO:0016153	urocanate hydratase activity	molecular_function	0.0054691	0.62423	1	36	4	25884
GO:0004683	calmodulin-dependent protein kinase activity	molecular_function	0.0054993	0.62423	1	36	4	25884
GO:0009129	pyrimidine nucleoside monophosphate metabolic process	biological_process	0.0055254	0.62423	1	36	4	25884
GO:0009130	pyrimidine nucleoside monophosphate biosynthetic process	biological_process	0.0055254	0.62423	1	36	4	25884
GO:0009157	deoxyribonucleoside monophosphate biosynthetic process	biological_process	0.0055254	0.62423	1	36	4	25884
GO:0009162	deoxyribonucleoside monophosphate metabolic process	biological_process	0.0055254	0.62423	1	36	4	25884
GO:0009176	pyrimidine deoxyribonucleoside monophosphate metabolic process	biological_process	0.0055254	0.62423	1	36	4	25884
GO:0009177	pyrimidine deoxyribonucleoside monophosphate biosynthetic process	biological_process	0.0055254	0.62423	1	36	4	25884
GO:0009221	pyrimidine deoxyribonucleotide biosynthetic process	biological_process	0.0055254	0.62423	1	36	4	25884
GO:0009263	deoxyribonucleotide biosynthetic process	biological_process	0.0055254	0.62423	1	36	4	25884
GO:0009265	2'-deoxyribonucleotide biosynthetic process	biological_process	0.0055254	0.62423	1	36	4	25884
GO:0046385	deoxyribose phosphate biosynthetic process	biological_process	0.0055254	0.62423	1	36	4	25884
GO:0019012	virion	cellular_component	0.006092	0.66785	4	36	528	25884
GO:0044723	single-organism carbohydrate metabolic process	biological_process	0.0061998	0.66785	4	36	528	25884
GO:0044038	cell wall macromolecule biosynthetic process	biological_process	0.0068547	0.70558	1	36	5	25884
GO:0070589	cellular component macromolecule biosynthetic process	biological_process	0.0068547	0.70558	1	36	5	25884
GO:0009312	oligosaccharide biosynthetic process	biological_process	0.0075045	0.75567	2	36	93	25884
GO:0004146	dihydrofolate reductase activity	molecular_function	0.0083104	0.77701	1	36	6	25884
GO:0006544	glycine metabolic process	biological_process	0.0083334	0.77701	1	36	6	25884
GO:0046992	oxidoreductase activity, acting on X-H and Y-H to form an X-Y bond	molecular_function	0.0083875	0.77701	1	36	6	25884
GO:0050485	oxidoreductase activity, acting on X-H and Y-H to form an X-Y bond, with a disulfide as acceptor	molecular_function	0.0083875	0.77701	1	36	6	25884
GO:0009070	serine family amino acid biosynthetic process	biological_process	0.0096034	0.85717	1	36	7	25884
GO:0008373	sialyltransferase activity	molecular_function	0.0096228	0.85717	1	36	7	25884
GO:0048037	cofactor binding	molecular_function	0.010569	0.90475	5	36	977	25884
GO:0009219	pyrimidine deoxyribonucleotide metabolic process	biological_process	0.010986	0.90475	1	36	8	25884
GO:0009394	2'-deoxyribonucleotide metabolic process	biological_process	0.010986	0.90475	1	36	8	25884
GO:0019692	deoxyribose phosphate metabolic process	biological_process	0.010986	0.90475	1	36	8	25884
GO:0009311	oligosaccharide metabolic process	biological_process	0.011134	0.90475	2	36	114	25884
GO:0032787	monocarboxylic acid metabolic process	biological_process	0.011855	0.9468	3	36	343	25884
GO:0009262	deoxyribonucleotide metabolic process	biological_process	0.012352	0.95437	1	36	9	25884
GO:0044699	single-organism process	biological_process	0.012362	0.95437	21	36	9947	25884
GO:0008716	D-alanine-D-alanine ligase activity	molecular_function	0.013549	1	1	36	9	25884
GO:0004764	shikimate 3-dehydrogenase (NADP+) activity	molecular_function	0.014696	1	1	36	10	25884
GO:0016836	hydro-lyase activity	molecular_function	0.014906	1	2	36	134	25884
GO:0003989	acetyl-CoA carboxylase activity	molecular_function	0.016051	1	1	36	11	25884
GO:0016421	CoA carboxylase activity	molecular_function	0.016051	1	1	36	11	25884
GO:0016885	ligase activity, forming carbon-carbon bonds	molecular_function	0.016051	1	1	36	11	25884
GO:0017089	glycolipid transporter activity	molecular_function	0.017746	1	1	36	13	25884
GO:0046836	glycolipid transport	biological_process	0.017746	1	1	36	13	25884
GO:0003855	3-dehydroquinate dehydratase activity	molecular_function	0.017904	1	1	36	13	25884
GO:0009124	nucleoside monophosphate biosynthetic process	biological_process	0.018097	1	2	36	148	25884
GO:0008033	tRNA processing	biological_process	0.019213	1	3	36	408	25884
GO:1901264	carbohydrate derivative transport	biological_process	0.020413	1	1	36	15	25884
GO:0009069	serine family amino acid metabolic process	biological_process	0.021868	1	1	36	16	25884
GO:0006813	potassium ion transport	biological_process	0.022332	1	2	36	166	25884
GO:0071554	cell wall organization or biogenesis	biological_process	0.022558	1	2	36	168	25884
GO:0080019	fatty-acyl-CoA reductase (alcohol-forming) activity	molecular_function	0.02313	1	1	36	17	25884
GO:0051861	glycolipid binding	molecular_function	0.023311	1	1	36	17	25884
GO:0004568	chitinase activity	molecular_function	0.02438	1	1	36	18	25884
GO:0005184	neuropeptide hormone activity	molecular_function	0.024788	1	1	36	18	25884
GO:0006801	superoxide metabolic process	biological_process	0.025802	1	1	36	19	25884
GO:0072593	reactive oxygen species metabolic process	biological_process	0.025802	1	1	36	19	25884
GO:0016998	cell wall macromolecule catabolic process	biological_process	0.025959	1	1	36	19	25884
GO:1901135	carbohydrate derivative metabolic process	biological_process	0.026211	1	4	36	818	25884
GO:0006032	chitin catabolic process	biological_process	0.027066	1	1	36	20	25884
GO:0046348	amino sugar catabolic process	biological_process	0.027066	1	1	36	20	25884
GO:1901072	glucosamine-containing compound catabolic process	biological_process	0.027066	1	1	36	20	25884
GO:0008061	chitin binding	molecular_function	0.027479	1	1	36	20	25884
GO:1901137	carbohydrate derivative biosynthetic process	biological_process	0.027594	1	3	36	470	25884
GO:0006221	pyrimidine nucleotide biosynthetic process	biological_process	0.02844	1	1	36	21	25884
GO:0005319	lipid transporter activity	molecular_function	0.028969	1	1	36	21	25884
GO:0044423	virion part	cellular_component	0.030681	1	3	36	490	25884
GO:0019752	carboxylic acid metabolic process	biological_process	0.030845	1	4	36	861	25884
GO:0006030	chitin metabolic process	biological_process	0.031092	1	1	36	23	25884
GO:1901071	glucosamine-containing compound metabolic process	biological_process	0.031092	1	1	36	23	25884
GO:0006026	aminoglycan catabolic process	biological_process	0.031322	1	1	36	23	25884
GO:1901576	organic substance biosynthetic process	biological_process	0.031484	1	13	36	5545	25884
GO:0043436	oxoacid metabolic process	biological_process	0.032682	1	4	36	877	25884
GO:0006082	organic acid metabolic process	biological_process	0.032914	1	4	36	879	25884
GO:0006220	pyrimidine nucleotide metabolic process	biological_process	0.033778	1	1	36	25	25884
GO:0003824	catalytic activity	molecular_function	0.034792	1	24	36	12972	25884
GO:0034470	ncRNA processing	biological_process	0.034956	1	3	36	516	25884
GO:0051287	NAD binding	molecular_function	0.036393	1	2	36	218	25884
GO:0016835	carbon-oxygen lyase activity	molecular_function	0.036793	1	2	36	218	25884
GO:0046677	response to antibiotic	biological_process	0.03708	1	1	36	27	25884
GO:0006399	tRNA metabolic process	biological_process	0.037389	1	3	36	529	25884
GO:0019031	viral envelope	cellular_component	0.039295	1	2	36	224	25884
GO:0036338	viral membrane	cellular_component	0.039295	1	2	36	224	25884
GO:0009636	response to toxic substance	biological_process	0.042398	1	1	36	31	25884
GO:0015672	monovalent inorganic cation transport	biological_process	0.04336	1	3	36	564	25884
GO:0009058	biosynthetic process	biological_process	0.043705	1	13	36	5798	25884
GO:0009165	nucleotide biosynthetic process	biological_process	0.044471	1	2	36	242	25884
GO:1901293	nucleoside phosphate biosynthetic process	biological_process	0.044471	1	2	36	242	25884
GO:0005634	nucleus	cellular_component	0.044833	1	7	36	2394	25884
GO:0044281	small molecule metabolic process	biological_process	0.045602	1	5	36	1423	25884
GO:1901505	carbohydrate derivative transporter activity	molecular_function	0.047088	1	1	36	35	25884
GO:0008152	metabolic process	biological_process	0.047241	1	25	36	14041	25884
GO:0006040	amino sugar metabolic process	biological_process	0.048496	1	1	36	36	25884
GO:0042546	cell wall biogenesis	biological_process	0.051164	1	1	36	38	25884
GO:0016646	oxidoreductase activity, acting on the CH-NH group of donors, NAD or NADP as acceptor	molecular_function	0.051482	1	1	36	38	25884
GO:0016881	acid-amino acid ligase activity	molecular_function	0.053769	1	1	36	38	25884
GO:0009123	nucleoside monophosphate metabolic process	biological_process	0.055221	1	2	36	273	25884
GO:0006812	cation transport	biological_process	0.057139	1	4	36	1053	25884
GO:0050660	flavin adenine dinucleotide binding	molecular_function	0.057373	1	2	36	279	25884
GO:0030001	metal ion transport	biological_process	0.058475	1	3	36	640	25884
GO:0034660	ncRNA metabolic process	biological_process	0.058793	1	3	36	637	25884
GO:0044255	cellular lipid metabolic process	biological_process	0.062542	1	3	36	653	25884
GO:0006022	aminoglycan metabolic process	biological_process	0.063042	1	1	36	47	25884
GO:0016759	cellulose synthase activity	molecular_function	0.068105	1	1	36	49	25884
GO:0016760	cellulose synthase (UDP-forming) activity	molecular_function	0.068105	1	1	36	49	25884
GO:0005516	calmodulin binding	molecular_function	0.08028	1	1	36	59	25884
GO:0000276	mitochondrial proton-transporting ATP synthase complex, coupling factor F(o)	cellular_component	0.080897	1	1	36	60	25884
GO:0030244	cellulose biosynthetic process	biological_process	0.080966	1	1	36	59	25884
GO:0006304	DNA modification	biological_process	0.081518	1	1	36	61	25884
GO:0072528	pyrimidine-containing compound biosynthetic process	biological_process	0.083545	1	1	36	63	25884
GO:0016053	organic acid biosynthetic process	biological_process	0.086971	1	2	36	355	25884
GO:0046394	carboxylic acid biosynthetic process	biological_process	0.086971	1	2	36	355	25884
GO:0016645	oxidoreductase activity, acting on the CH-NH group of donors	molecular_function	0.087124	1	1	36	65	25884
GO:0030243	cellulose metabolic process	biological_process	0.087306	1	1	36	64	25884
GO:1901136	carbohydrate derivative catabolic process	biological_process	0.08848	1	1	36	67	25884
GO:0006869	lipid transport	biological_process	0.092671	1	1	36	70	25884
GO:0005975	carbohydrate metabolic process	biological_process	0.094722	1	4	36	1250	25884
GO:0016757	transferase activity, transferring glycosyl groups	molecular_function	0.095281	1	3	36	783	25884
GO:0043231	intracellular membrane-bounded organelle	cellular_component	0.099416	1	8	36	3450	25884
GO:0005753	mitochondrial proton-transporting ATP synthase complex	cellular_component	0.099756	1	1	36	75	25884
GO:0043227	membrane-bounded organelle	cellular_component	0.099938	1	8	36	3454	25884
GO:0010876	lipid localization	biological_process	0.10021	1	1	36	76	25884
GO:0051274	beta-glucan biosynthetic process	biological_process	0.10097	1	1	36	72	25884
GO:0072527	pyrimidine-containing compound metabolic process	biological_process	0.10117	1	1	36	77	25884
GO:0016620	oxidoreductase activity, acting on the aldehyde or oxo group of donors, NAD or NADP as acceptor	molecular_function	0.10409	1	1	36	79	25884
GO:0006396	RNA processing	biological_process	0.10656	1	3	36	820	25884
GO:0051273	beta-glucan metabolic process	biological_process	0.10718	1	1	36	77	25884
GO:0045263	proton-transporting ATP synthase complex, coupling factor F(o)	cellular_component	0.10733	1	1	36	81	25884
GO:0009117	nucleotide metabolic process	biological_process	0.10755	1	2	36	403	25884
GO:0071704	organic substance metabolic process	biological_process	0.10839	1	20	36	11342	25884
GO:0006753	nucleoside phosphate metabolic process	biological_process	0.10975	1	2	36	408	25884
GO:0009250	glucan biosynthetic process	biological_process	0.10983	1	1	36	79	25884
GO:0035251	UDP-glucosyltransferase activity	molecular_function	0.11047	1	1	36	79	25884
GO:0061630	ubiquitin protein ligase activity	molecular_function	0.11634	1	1	36	88	25884
GO:0061659	ubiquitin-like protein ligase activity	molecular_function	0.11634	1	1	36	88	25884
GO:0090407	organophosphate biosynthetic process	biological_process	0.11825	1	2	36	424	25884
GO:0016879	ligase activity, forming carbon-nitrogen bonds	molecular_function	0.12295	1	1	36	92	25884
GO:0046527	glucosyltransferase activity	molecular_function	0.12677	1	1	36	92	25884
GO:0033692	cellular polysaccharide biosynthetic process	biological_process	0.12833	1	1	36	94	25884
GO:0044238	primary metabolic process	biological_process	0.12871	1	19	36	10855	25884
GO:0006811	ion transport	biological_process	0.1301	1	4	36	1410	25884
GO:0016903	oxidoreductase activity, acting on the aldehyde or oxo group of donors	molecular_function	0.13732	1	1	36	106	25884
GO:0006486	protein glycosylation	biological_process	0.13755	1	1	36	106	25884
GO:0043413	macromolecule glycosylation	biological_process	0.13755	1	1	36	106	25884
GO:0006633	fatty acid biosynthetic process	biological_process	0.13985	1	1	36	108	25884
GO:0044283	small molecule biosynthetic process	biological_process	0.14077	1	2	36	475	25884
GO:0000271	polysaccharide biosynthetic process	biological_process	0.14193	1	1	36	105	25884
GO:0055086	nucleobase-containing small molecule metabolic process	biological_process	0.14199	1	2	36	478	25884
GO:1901360	organic cyclic compound metabolic process	biological_process	0.14511	1	11	36	5634	25884
GO:0045259	proton-transporting ATP synthase complex	cellular_component	0.14515	1	1	36	112	25884
GO:0009101	glycoprotein biosynthetic process	biological_process	0.14827	1	1	36	115	25884
GO:0009100	glycoprotein metabolic process	biological_process	0.15299	1	1	36	119	25884
GO:0016032	viral process	biological_process	0.15308	1	2	36	499	25884
GO:0001871	pattern binding	molecular_function	0.15716	1	1	36	122	25884
GO:0030247	polysaccharide binding	molecular_function	0.15716	1	1	36	122	25884
GO:0098800	inner mitochondrial membrane protein complex	cellular_component	0.15741	1	1	36	122	25884
GO:0015985	energy coupled proton transport, down electrochemical gradient	biological_process	0.15806	1	1	36	123	25884
GO:0015986	ATP synthesis coupled proton transport	biological_process	0.15806	1	1	36	123	25884
GO:0006754	ATP biosynthetic process	biological_process	0.16616	1	1	36	130	25884
GO:0006073	cellular glucan metabolic process	biological_process	0.16808	1	1	36	128	25884
GO:0044042	glucan metabolic process	biological_process	0.16808	1	1	36	128	25884
GO:0072330	monocarboxylic acid biosynthetic process	biological_process	0.16904	1	1	36	133	25884
GO:0005179	hormone activity	molecular_function	0.16969	1	1	36	129	25884
GO:1901565	organonitrogen compound catabolic process	biological_process	0.1706	1	1	36	135	25884
GO:0070085	glycosylation	biological_process	0.17287	1	1	36	136	25884
GO:0009142	nucleoside triphosphate biosynthetic process	biological_process	0.17753	1	1	36	140	25884
GO:0009145	purine nucleoside triphosphate biosynthetic process	biological_process	0.17753	1	1	36	140	25884
GO:0009201	ribonucleoside triphosphate biosynthetic process	biological_process	0.17753	1	1	36	140	25884
GO:0009206	purine ribonucleoside triphosphate biosynthetic process	biological_process	0.17753	1	1	36	140	25884
GO:0016829	lyase activity	molecular_function	0.18097	1	2	36	558	25884
GO:0006338	chromatin remodeling	biological_process	0.18198	1	1	36	144	25884
GO:0009127	purine nucleoside monophosphate biosynthetic process	biological_process	0.1825	1	1	36	144	25884
GO:0009168	purine ribonucleoside monophosphate biosynthetic process	biological_process	0.1825	1	1	36	144	25884
GO:0009156	ribonucleoside monophosphate biosynthetic process	biological_process	0.18363	1	1	36	145	25884
GO:0000228	nuclear chromosome	cellular_component	0.18528	1	1	36	146	25884
GO:0044264	cellular polysaccharide metabolic process	biological_process	0.18539	1	1	36	143	25884
GO:0044249	cellular biosynthetic process	biological_process	0.18969	1	10	36	5305	25884
GO:0044764	multi-organism cellular process	biological_process	0.19115	1	2	36	576	25884
GO:0008150	biological_process	biological_process	0.19192	1	29	36	18791	25884
GO:0044765	single-organism transport	biological_process	0.19223	1	6	36	2812	25884
GO:0044403	symbiosis, encompassing mutualism through parasitism	biological_process	0.19966	1	2	36	592	25884
GO:0044419	interspecies interaction between organisms	biological_process	0.20319	1	2	36	599	25884
GO:1902578	single-organism localization	biological_process	0.20479	1	6	36	2869	25884
GO:0033177	proton-transporting two-sector ATPase complex, proton-transporting domain	cellular_component	0.20766	1	1	36	167	25884
GO:0098798	mitochondrial protein complex	cellular_component	0.20914	1	1	36	167	25884
GO:0044455	mitochondrial membrane part	cellular_component	0.21288	1	1	36	170	25884
GO:0005743	mitochondrial inner membrane	cellular_component	0.21353	1	1	36	170	25884
GO:1901362	organic cyclic compound biosynthetic process	biological_process	0.21431	1	7	36	3530	25884
GO:0019866	organelle inner membrane	cellular_component	0.21804	1	1	36	174	25884
GO:0042451	purine nucleoside biosynthetic process	biological_process	0.21902	1	1	36	177	25884
GO:0046129	purine ribonucleoside biosynthetic process	biological_process	0.21902	1	1	36	177	25884
GO:0004540	ribonuclease activity	molecular_function	0.22221	1	1	36	171	25884
GO:0009163	nucleoside biosynthetic process	biological_process	0.22811	1	1	36	185	25884
GO:0042455	ribonucleoside biosynthetic process	biological_process	0.22811	1	1	36	185	25884
GO:0005976	polysaccharide metabolic process	biological_process	0.22901	1	1	36	182	25884
GO:1901659	glycosyl compound biosynthetic process	biological_process	0.23024	1	1	36	187	25884
GO:0003677	DNA binding	molecular_function	0.23189	1	6	36	2964	25884
GO:0009152	purine ribonucleotide biosynthetic process	biological_process	0.23224	1	1	36	189	25884
GO:1901607	alpha-amino acid biosynthetic process	biological_process	0.23312	1	1	36	190	25884
GO:0009260	ribonucleotide biosynthetic process	biological_process	0.23331	1	1	36	190	25884
GO:0046390	ribose phosphate biosynthetic process	biological_process	0.23331	1	1	36	190	25884
GO:0006164	purine nucleotide biosynthetic process	biological_process	0.23861	1	1	36	195	25884
GO:0043229	intracellular organelle	cellular_component	0.24051	1	8	36	4293	25884
GO:0008194	UDP-glycosyltransferase activity	molecular_function	0.24292	1	1	36	193	25884
GO:0016568	chromatin modification	biological_process	0.24587	1	1	36	200	25884
GO:0072522	purine-containing compound biosynthetic process	biological_process	0.25223	1	1	36	208	25884
GO:0043226	organelle	cellular_component	0.25429	1	8	36	4360	25884
GO:0051301	cell division	biological_process	0.25645	1	1	36	211	25884
GO:0008652	cellular amino acid biosynthetic process	biological_process	0.26574	1	1	36	221	25884
GO:0016788	hydrolase activity, acting on ester bonds	molecular_function	0.26887	1	3	36	1285	25884
GO:0003779	actin binding	molecular_function	0.26985	1	1	36	223	25884
GO:0006139	nucleobase-containing compound metabolic process	biological_process	0.27048	1	9	36	5080	25884
GO:0019637	organophosphate metabolic process	biological_process	0.28002	1	2	36	747	25884
GO:0051704	multi-organism process	biological_process	0.28312	1	3	36	1326	25884
GO:0022892	substrate-specific transporter activity	molecular_function	0.28637	1	3	36	1342	25884
GO:0006810	transport	biological_process	0.28946	1	7	36	3868	25884
GO:0006325	chromatin organization	biological_process	0.2947	1	1	36	248	25884
GO:0051234	establishment of localization	biological_process	0.29612	1	7	36	3897	25884
GO:0046034	ATP metabolic process	biological_process	0.29988	1	1	36	255	25884
GO:0005215	transporter activity	molecular_function	0.30045	1	4	36	1990	25884
GO:0016469	proton-transporting two-sector ATPase complex	cellular_component	0.30226	1	1	36	256	25884
GO:0005216	ion channel activity	molecular_function	0.30233	1	1	36	256	25884
GO:0022838	substrate-specific channel activity	molecular_function	0.30233	1	1	36	256	25884
GO:0015267	channel activity	molecular_function	0.3033	1	1	36	257	25884
GO:0022803	passive transmembrane transporter activity	molecular_function	0.3033	1	1	36	257	25884
GO:0030246	carbohydrate binding	molecular_function	0.30419	1	1	36	257	25884
GO:0044237	cellular metabolic process	biological_process	0.30461	1	16	36	10050	25884
GO:1902600	hydrogen ion transmembrane transport	biological_process	0.30902	1	1	36	263	25884
GO:0009144	purine nucleoside triphosphate metabolic process	biological_process	0.30947	1	1	36	265	25884
GO:0009199	ribonucleoside triphosphate metabolic process	biological_process	0.30947	1	1	36	265	25884
GO:0009205	purine ribonucleoside triphosphate metabolic process	biological_process	0.30947	1	1	36	265	25884
GO:0019028	viral capsid	cellular_component	0.31277	1	1	36	268	25884
GO:0009141	nucleoside triphosphate metabolic process	biological_process	0.3133	1	1	36	269	25884
GO:0009126	purine nucleoside monophosphate metabolic process	biological_process	0.31366	1	1	36	269	25884
GO:0009167	purine ribonucleoside monophosphate metabolic process	biological_process	0.31366	1	1	36	269	25884
GO:0008289	lipid binding	molecular_function	0.31449	1	1	36	269	25884
GO:0009161	ribonucleoside monophosphate metabolic process	biological_process	0.31462	1	1	36	270	25884
GO:1901605	alpha-amino acid metabolic process	biological_process	0.3169	1	1	36	272	25884
GO:0051179	localization	biological_process	0.31947	1	7	36	3995	25884
GO:0044424	intracellular part	cellular_component	0.33877	1	9	36	5426	25884
GO:0016874	ligase activity	molecular_function	0.34015	1	1	36	294	25884
GO:0006818	hydrogen transport	biological_process	0.34123	1	1	36	297	25884
GO:0015992	proton transport	biological_process	0.34123	1	1	36	297	25884
GO:0031966	mitochondrial membrane	cellular_component	0.34191	1	1	36	297	25884
GO:0006725	cellular aromatic compound metabolic process	biological_process	0.34605	1	9	36	5445	25884
GO:0004674	protein serine/threonine kinase activity	molecular_function	0.34635	1	1	36	298	25884
GO:0046483	heterocycle metabolic process	biological_process	0.34683	1	9	36	5448	25884
GO:0005740	mitochondrial envelope	cellular_component	0.35194	1	1	36	308	25884
GO:0044428	nuclear part	cellular_component	0.35493	1	2	36	893	25884
GO:0042278	purine nucleoside metabolic process	biological_process	0.35646	1	1	36	315	25884
GO:0046128	purine ribonucleoside metabolic process	biological_process	0.35646	1	1	36	315	25884
GO:0009405	pathogenesis	biological_process	0.35747	1	1	36	313	25884
GO:0044763	single-organism cellular process	biological_process	0.35782	1	11	36	6874	25884
GO:0009119	ribonucleoside metabolic process	biological_process	0.36667	1	1	36	326	25884
GO:0009150	purine ribonucleotide metabolic process	biological_process	0.36918	1	1	36	329	25884
GO:0009259	ribonucleotide metabolic process	biological_process	0.37006	1	1	36	330	25884
GO:0005622	intracellular	cellular_component	0.37234	1	9	36	5582	25884
GO:0003674	molecular_function	molecular_function	0.37327	1	33	36	22810	25884
GO:0044429	mitochondrial part	cellular_component	0.37346	1	1	36	332	25884
GO:0006163	purine nucleotide metabolic process	biological_process	0.37444	1	1	36	335	25884
GO:0000152	nuclear ubiquitin ligase complex	cellular_component	0.37498	1	1	36	338	25884
GO:0005680	anaphase-promoting complex	cellular_component	0.37498	1	1	36	338	25884
GO:0031461	cullin-RING ubiquitin ligase complex	cellular_component	0.37498	1	1	36	338	25884
GO:0000151	ubiquitin ligase complex	cellular_component	0.3788	1	1	36	342	25884
GO:0031967	organelle envelope	cellular_component	0.38279	1	1	36	342	25884
GO:0005576	extracellular region	cellular_component	0.3831	1	2	36	944	25884
GO:0019693	ribose phosphate metabolic process	biological_process	0.38311	1	1	36	345	25884
GO:0072521	purine-containing compound metabolic process	biological_process	0.38569	1	1	36	348	25884
GO:0009057	macromolecule catabolic process	biological_process	0.393	1	1	36	354	25884
GO:0005886	plasma membrane	cellular_component	0.39903	1	1	36	358	25884
GO:0042221	response to chemical	biological_process	0.40002	1	1	36	362	25884
GO:0022857	transmembrane transporter activity	molecular_function	0.40585	1	3	36	1644	25884
GO:0098662	inorganic cation transmembrane transport	biological_process	0.40658	1	1	36	370	25884
GO:0098655	cation transmembrane transport	biological_process	0.40741	1	1	36	371	25884
GO:0098660	inorganic ion transmembrane transport	biological_process	0.40741	1	1	36	371	25884
GO:0009116	nucleoside metabolic process	biological_process	0.40769	1	1	36	374	25884
GO:1901657	glycosyl compound metabolic process	biological_process	0.40933	1	1	36	376	25884
GO:0016070	RNA metabolic process	biological_process	0.4103	1	6	36	3678	25884
GO:0005102	receptor binding	molecular_function	0.41191	1	1	36	372	25884
GO:0015078	hydrogen ion transmembrane transporter activity	molecular_function	0.41225	1	1	36	379	25884
GO:0034654	nucleobase-containing compound biosynthetic process	biological_process	0.41278	1	5	36	3010	25884
GO:0031975	envelope	cellular_component	0.4135	1	1	36	378	25884
GO:0005694	chromosome	cellular_component	0.41365	1	1	36	378	25884
GO:0016747	transferase activity, transferring acyl groups other than amino-acyl groups	molecular_function	0.4247	1	1	36	395	25884
GO:0008236	serine-type peptidase activity	molecular_function	0.43471	1	1	36	407	25884
GO:0017171	serine hydrolase activity	molecular_function	0.43471	1	1	36	407	25884
GO:0001071	nucleic acid binding transcription factor activity	molecular_function	0.43514	1	2	36	1060	25884
GO:0003700	transcription factor activity, sequence-specific DNA binding	molecular_function	0.43514	1	2	36	1060	25884
GO:0007010	cytoskeleton organization	biological_process	0.43648	1	1	36	406	25884
GO:0006807	nitrogen compound metabolic process	biological_process	0.44492	1	10	36	6603	25884
GO:0004518	nuclease activity	molecular_function	0.45991	1	1	36	427	25884
GO:0031981	nuclear lumen	cellular_component	0.46031	1	1	36	436	25884
GO:0034220	ion transmembrane transport	biological_process	0.47128	1	1	36	452	25884
GO:0090304	nucleic acid metabolic process	biological_process	0.47221	1	7	36	4605	25884
GO:0006996	organelle organization	biological_process	0.47548	1	2	36	1132	25884
GO:0043233	organelle lumen	cellular_component	0.48104	1	1	36	464	25884
GO:0070013	intracellular organelle lumen	cellular_component	0.48104	1	1	36	464	25884
GO:0005739	mitochondrion	cellular_component	0.48227	1	1	36	468	25884
GO:0031974	membrane-enclosed lumen	cellular_component	0.48319	1	1	36	467	25884
GO:0003676	nucleic acid binding	molecular_function	0.48595	1	7	36	4653	25884
GO:0008092	cytoskeletal protein binding	molecular_function	0.48888	1	1	36	472	25884
GO:0019438	aromatic compound biosynthetic process	biological_process	0.4925	1	5	36	3290	25884
GO:0051276	chromosome organization	biological_process	0.49288	1	1	36	478	25884
GO:0015075	ion transmembrane transporter activity	molecular_function	0.4929	1	2	36	1179	25884
GO:0005623	cell	cellular_component	0.49641	1	9	36	6143	25884
GO:0044464	cell part	cellular_component	0.49641	1	9	36	6143	25884
GO:0016746	transferase activity, transferring acyl groups	molecular_function	0.50293	1	1	36	499	25884
GO:0006260	DNA replication	biological_process	0.50664	1	1	36	502	25884
GO:0018130	heterocycle biosynthetic process	biological_process	0.50684	1	5	36	3341	25884
GO:0006520	cellular amino acid metabolic process	biological_process	0.50785	1	1	36	504	25884
GO:0004842	ubiquitin-protein transferase activity	molecular_function	0.5178	1	1	36	515	25884
GO:0019787	ubiquitin-like protein transferase activity	molecular_function	0.5178	1	1	36	515	25884
GO:0043565	sequence-specific DNA binding	molecular_function	0.52196	1	1	36	526	25884
GO:0022891	substrate-specific transmembrane transporter activity	molecular_function	0.52206	1	2	36	1244	25884
GO:0034641	cellular nitrogen compound metabolic process	biological_process	0.52394	1	9	36	6260	25884
GO:0046983	protein dimerization activity	molecular_function	0.53441	1	1	36	544	25884
GO:0007049	cell cycle	biological_process	0.54156	1	1	36	553	25884
GO:0015077	monovalent inorganic cation transmembrane transporter activity	molecular_function	0.55025	1	1	36	568	25884
GO:0044446	intracellular organelle part	cellular_component	0.55113	1	3	36	2039	25884
GO:0016758	transferase activity, transferring hexosyl groups	molecular_function	0.55159	1	1	36	566	25884
GO:0008168	methyltransferase activity	molecular_function	0.55616	1	1	36	577	25884
GO:0044422	organelle part	cellular_component	0.56033	1	3	36	2066	25884
GO:1990234	transferase complex	cellular_component	0.56055	1	1	36	583	25884
GO:0006259	DNA metabolic process	biological_process	0.56707	1	2	36	1334	25884
GO:0016741	transferase activity, transferring one-carbon groups	molecular_function	0.57033	1	1	36	600	25884
GO:0055085	transmembrane transport	biological_process	0.57236	1	2	36	1358	25884
GO:0044260	cellular macromolecule metabolic process	biological_process	0.58085	1	11	36	7961	25884
GO:0043170	macromolecule metabolic process	biological_process	0.59547	1	12	36	8759	25884
GO:1901575	organic substance catabolic process	biological_process	0.59689	1	1	36	644	25884
GO:0005575	cellular_component	cellular_component	0.59705	1	15	36	10944	25884
GO:0010467	gene expression	biological_process	0.59987	1	6	36	4429	25884
GO:0004553	hydrolase activity, hydrolyzing O-glycosyl compounds	molecular_function	0.60296	1	1	36	658	25884
GO:0016021	integral component of membrane	cellular_component	0.61285	1	4	36	2992	25884
GO:0071944	cell periphery	cellular_component	0.6187	1	1	36	677	25884
GO:0044248	cellular catabolic process	biological_process	0.61925	1	1	36	684	25884
GO:0031224	intrinsic component of membrane	cellular_component	0.6223	1	4	36	3026	25884
GO:0043933	macromolecular complex subunit organization	biological_process	0.6253	1	1	36	691	25884
GO:0016798	hydrolase activity, acting on glycosyl bonds	molecular_function	0.62719	1	1	36	702	25884
GO:0006355	regulation of transcription, DNA-templated	biological_process	0.63454	1	3	36	2301	25884
GO:1903506	regulation of nucleic acid-templated transcription	biological_process	0.63454	1	3	36	2301	25884
GO:2001141	regulation of RNA biosynthetic process	biological_process	0.63665	1	3	36	2308	25884
GO:0044425	membrane part	cellular_component	0.63704	1	5	36	3831	25884
GO:0051252	regulation of RNA metabolic process	biological_process	0.63724	1	3	36	2310	25884
GO:1901564	organonitrogen compound metabolic process	biological_process	0.63952	1	3	36	2329	25884
GO:0019219	regulation of nucleobase-containing compound metabolic process	biological_process	0.64454	1	3	36	2334	25884
GO:0031090	organelle membrane	cellular_component	0.6561	1	1	36	748	25884
GO:0016740	transferase activity	molecular_function	0.66213	1	7	36	5433	25884
GO:0097367	carbohydrate derivative binding	molecular_function	0.66982	1	5	36	3930	25884
GO:0009987	cellular process	biological_process	0.67585	1	18	36	13526	25884
GO:2000112	regulation of cellular macromolecule biosynthetic process	biological_process	0.67805	1	3	36	2450	25884
GO:0009889	regulation of biosynthetic process	biological_process	0.67971	1	3	36	2456	25884
GO:0010556	regulation of macromolecule biosynthetic process	biological_process	0.67971	1	3	36	2456	25884
GO:0031326	regulation of cellular biosynthetic process	biological_process	0.67971	1	3	36	2456	25884
GO:1902494	catalytic complex	cellular_component	0.68038	1	1	36	807	25884
GO:0051171	regulation of nitrogen compound metabolic process	biological_process	0.6822	1	3	36	2465	25884
GO:0010468	regulation of gene expression	biological_process	0.68758	1	3	36	2485	25884
GO:0016787	hydrolase activity	molecular_function	0.68849	1	6	36	4804	25884
GO:0022890	inorganic cation transmembrane transporter activity	molecular_function	0.69419	1	1	36	837	25884
GO:0044085	cellular component biogenesis	biological_process	0.69471	1	1	36	835	25884
GO:0006796	phosphate-containing compound metabolic process	biological_process	0.70445	1	3	36	2542	25884
GO:1901566	organonitrogen compound biosynthetic process	biological_process	0.7045	1	2	36	1736	25884
GO:0006793	phosphorus metabolic process	biological_process	0.70548	1	3	36	2546	25884
GO:0080090	regulation of primary metabolic process	biological_process	0.71109	1	3	36	2572	25884
GO:0031323	regulation of cellular metabolic process	biological_process	0.71351	1	3	36	2582	25884
GO:0060255	regulation of macromolecule metabolic process	biological_process	0.71444	1	3	36	2586	25884
GO:0034645	cellular macromolecule biosynthetic process	biological_process	0.71448	1	5	36	4177	25884
GO:0044271	cellular nitrogen compound biosynthetic process	biological_process	0.7172	1	5	36	4197	25884
GO:0009056	catabolic process	biological_process	0.71751	1	1	36	892	25884
GO:0009059	macromolecule biosynthetic process	biological_process	0.72651	1	5	36	4235	25884
GO:0008324	cation transmembrane transporter activity	molecular_function	0.72863	1	1	36	920	25884
GO:0019222	regulation of metabolic process	biological_process	0.74563	1	3	36	2712	25884
GO:0098796	membrane protein complex	cellular_component	0.74564	1	1	36	956	25884
GO:0006351	transcription, DNA-templated	biological_process	0.74676	1	3	36	2718	25884
GO:0097659	nucleic acid-templated transcription	biological_process	0.74676	1	3	36	2718	25884
GO:0016043	cellular component organization	biological_process	0.74871	1	2	36	1871	25884
GO:0005198	structural molecule activity	molecular_function	0.75214	1	1	36	982	25884
GO:0032774	RNA biosynthetic process	biological_process	0.75683	1	3	36	2762	25884
GO:0043412	macromolecule modification	biological_process	0.76255	1	3	36	2781	25884
GO:0006508	proteolysis	biological_process	0.76591	1	1	36	1020	25884
GO:0070011	peptidase activity, acting on L-amino acid peptides	molecular_function	0.76763	1	1	36	1027	25884
GO:0005488	binding	molecular_function	0.76849	1	20	36	15484	25884
GO:0046872	metal ion binding	molecular_function	0.78478	1	4	36	3735	25884
GO:0043168	anion binding	molecular_function	0.78656	1	5	36	4512	25884
GO:0000166	nucleotide binding	molecular_function	0.7879	1	5	36	4516	25884
GO:1901265	nucleoside phosphate binding	molecular_function	0.7879	1	5	36	4516	25884
GO:0043169	cation binding	molecular_function	0.79085	1	4	36	3768	25884
GO:0071840	cellular component organization or biogenesis	biological_process	0.79193	1	2	36	2044	25884
GO:0008233	peptidase activity	molecular_function	0.79401	1	1	36	1109	25884
GO:0036094	small molecule binding	molecular_function	0.80778	1	5	36	4637	25884
GO:0043232	intracellular non-membrane-bounded organelle	cellular_component	0.82623	1	1	36	1226	25884
GO:1901363	heterocyclic compound binding	molecular_function	0.83298	1	10	36	8738	25884
GO:0097159	organic cyclic compound binding	molecular_function	0.8331	1	10	36	8739	25884
GO:0033036	macromolecule localization	biological_process	0.83436	1	1	36	1252	25884
GO:0043228	non-membrane-bounded organelle	cellular_component	0.83489	1	1	36	1261	25884
GO:0043234	protein complex	cellular_component	0.86653	1	2	36	2433	25884
GO:0071702	organic substance transport	biological_process	0.87328	1	1	36	1435	25884
GO:0016818	hydrolase activity, acting on acid anhydrides, in phosphorus-containing anhydrides	molecular_function	0.87616	1	1	36	1433	25884
GO:0006464	cellular protein modification process	biological_process	0.87721	1	2	36	2499	25884
GO:0036211	protein modification process	biological_process	0.87721	1	2	36	2499	25884
GO:0016020	membrane	cellular_component	0.87799	1	6	36	6031	25884
GO:0005737	cytoplasm	cellular_component	0.88301	1	2	36	2550	25884
GO:0005524	ATP binding	molecular_function	0.88718	1	3	36	3485	25884
GO:0016817	hydrolase activity, acting on acid anhydrides	molecular_function	0.89553	1	1	36	1547	25884
GO:0032559	adenyl ribonucleotide binding	molecular_function	0.89976	1	3	36	3591	25884
GO:0043167	ion binding	molecular_function	0.90187	1	8	36	7865	25884
GO:0030554	adenyl nucleotide binding	molecular_function	0.90373	1	3	36	3628	25884
GO:0035639	purine ribonucleoside triphosphate binding	molecular_function	0.9147	1	3	36	3742	25884
GO:0008270	zinc ion binding	molecular_function	0.918	1	1	36	1726	25884
GO:0006468	protein phosphorylation	biological_process	0.91991	1	1	36	1739	25884
GO:0001883	purine nucleoside binding	molecular_function	0.92343	1	3	36	3835	25884
GO:0032549	ribonucleoside binding	molecular_function	0.92343	1	3	36	3835	25884
GO:0032550	purine ribonucleoside binding	molecular_function	0.92343	1	3	36	3835	25884
GO:0032555	purine ribonucleotide binding	molecular_function	0.92386	1	3	36	3840	25884
GO:0001882	nucleoside binding	molecular_function	0.92414	1	3	36	3843	25884
GO:0032553	ribonucleotide binding	molecular_function	0.92694	1	3	36	3877	25884
GO:0017076	purine nucleotide binding	molecular_function	0.92742	1	3	36	3882	25884
GO:0004672	protein kinase activity	molecular_function	0.93532	1	1	36	1874	25884
GO:0016310	phosphorylation	biological_process	0.93727	1	1	36	1902	25884
GO:0032991	macromolecular complex	cellular_component	0.94366	1	2	36	3138	25884
GO:0050794	regulation of cellular process	biological_process	0.94463	1	3	36	4160	25884
GO:0044444	cytoplasmic part	cellular_component	0.94473	1	1	36	1994	25884
GO:0050789	regulation of biological process	biological_process	0.95568	1	3	36	4347	25884
GO:0016773	phosphotransferase activity, alcohol group as acceptor	molecular_function	0.95843	1	1	36	2161	25884
GO:0016301	kinase activity	molecular_function	0.96492	1	1	36	2270	25884
GO:0065007	biological regulation	biological_process	0.96586	1	3	36	4562	25884
GO:0019538	protein metabolic process	biological_process	0.96743	1	3	36	4603	25884
GO:0046914	transition metal ion binding	molecular_function	0.97194	1	1	36	2438	25884
GO:0044267	cellular protein metabolic process	biological_process	0.97657	1	2	36	3794	25884
GO:0005515	protein binding	molecular_function	0.97805	1	5	36	6777	25884
GO:0016772	transferase activity, transferring phosphorus-containing groups	molecular_function	0.98752	1	1	36	2930	25884
GO:0050896	response to stimulus	biological_process	0.9879	1	1	36	2969	25884

## Sheet: lanceolate vs broad-ovate.GO
GO_accession	Description	Term_type	Over_represented_pValue	Corrected_pValue	DEG_item	DEG_list	Bg_item	Bg_list
GO:0071554	cell wall organization or biogenesis	biological_process	1.4227e-06	0.0065899	14	439	168	25884
GO:0030599	pectinesterase activity	molecular_function	4.6336e-06	0.0071542	10	439	91	25884
GO:0042545	cell wall modification	biological_process	4.6336e-06	0.0071542	10	439	91	25884
GO:0006631	fatty acid metabolic process	biological_process	1.0359e-05	0.0087426	15	439	226	25884
GO:0006629	lipid metabolic process	biological_process	1.1087e-05	0.0087426	40	439	1106	25884
GO:0071555	cell wall organization	biological_process	1.1635e-05	0.0087426	11	439	124	25884
GO:0045229	external encapsulating structure organization	biological_process	1.3212e-05	0.0087426	11	439	126	25884
GO:0052689	carboxylic ester hydrolase activity	molecular_function	2.6696e-05	0.015457	14	439	218	25884
GO:0016616	oxidoreductase activity, acting on the CH-OH group of donors, NAD or NADP as acceptor	molecular_function	3.0154e-05	0.015519	20	439	403	25884
GO:0004315	3-oxoacyl-[acyl-carrier-protein] synthase activity	molecular_function	4.6107e-05	0.021357	6	439	37	25884
GO:0004312	fatty acid synthase activity	molecular_function	7.2153e-05	0.030383	6	439	40	25884
GO:0005618	cell wall	cellular_component	8.2174e-05	0.031221	11	439	155	25884
GO:0020037	heme binding	molecular_function	8.7623e-05	0.031221	23	439	546	25884
GO:0016614	oxidoreductase activity, acting on CH-OH group of donors	molecular_function	0.00010521	0.034151	20	439	441	25884
GO:0046906	tetrapyrrole binding	molecular_function	0.00011464	0.034151	23	439	556	25884
GO:0008610	lipid biosynthetic process	biological_process	0.00011797	0.034151	24	439	590	25884
GO:0055114	oxidation-reduction process	biological_process	0.0001751	0.04771	67	439	2500	25884
GO:0044255	cellular lipid metabolic process	biological_process	0.00023495	0.060461	25	439	653	25884
GO:0009627	systemic acquired resistance	biological_process	0.00032989	0.072765	3	439	10	25884
GO:0009814	defense response, incompatible interaction	biological_process	0.00032989	0.072765	3	439	10	25884
GO:0010112	regulation of systemic acquired resistance	biological_process	0.00032989	0.072765	3	439	10	25884
GO:0030312	external encapsulating structure	cellular_component	0.00045288	0.090485	12	439	221	25884
GO:0006855	drug transmembrane transport	biological_process	0.00046898	0.090485	7	439	78	25884
GO:0015893	drug transport	biological_process	0.00046898	0.090485	7	439	78	25884
GO:0015238	drug transmembrane transporter activity	molecular_function	0.0005079	0.090485	7	439	79	25884
GO:0090484	drug transporter activity	molecular_function	0.0005079	0.090485	7	439	79	25884
GO:0035251	UDP-glucosyltransferase activity	molecular_function	0.0005472	0.09323	7	439	79	25884
GO:0006633	fatty acid biosynthetic process	biological_process	0.00056357	0.09323	8	439	108	25884
GO:0042493	response to drug	biological_process	0.00059114	0.09442	7	439	81	25884
GO:0003854	3-beta-hydroxy-delta5-steroid dehydrogenase activity	molecular_function	0.00069633	0.10079	10	439	169	25884
GO:0016229	steroid dehydrogenase activity	molecular_function	0.00069633	0.10079	10	439	169	25884
GO:0033764	steroid dehydrogenase activity, acting on the CH-OH group of donors, NAD or NADP as acceptor	molecular_function	0.00069633	0.10079	10	439	169	25884
GO:0050776	regulation of immune response	biological_process	0.0007506	0.10536	4	439	26	25884
GO:0016788	hydrolase activity, acting on ester bonds	molecular_function	0.00082406	0.11227	38	439	1285	25884
GO:0032787	monocarboxylic acid metabolic process	biological_process	0.00099986	0.13232	15	439	343	25884
GO:0006694	steroid biosynthetic process	biological_process	0.0010725	0.13799	10	439	179	25884
GO:0045088	regulation of innate immune response	biological_process	0.0011743	0.14342	3	439	14	25884
GO:0032101	regulation of response to external stimulus	biological_process	0.0011843	0.14342	4	439	29	25884
GO:0008202	steroid metabolic process	biological_process	0.0012076	0.14342	10	439	182	25884
GO:0046527	glucosyltransferase activity	molecular_function	0.0013586	0.1539	7	439	92	25884
GO:0016835	carbon-oxygen lyase activity	molecular_function	0.0013622	0.1539	11	439	218	25884
GO:0016491	oxidoreductase activity	molecular_function	0.0017581	0.19389	65	439	2647	25884
GO:0016759	cellulose synthase activity	molecular_function	0.0018838	0.19831	5	439	49	25884
GO:0016760	cellulose synthase (UDP-forming) activity	molecular_function	0.0018838	0.19831	5	439	49	25884
GO:0072330	monocarboxylic acid biosynthetic process	biological_process	0.0020786	0.21396	8	439	133	25884
GO:0045087	innate immune response	biological_process	0.0022448	0.22605	3	439	17	25884
GO:0016634	oxidoreductase activity, acting on the CH-CH group of donors, oxygen as acceptor	molecular_function	0.0026695	0.26309	3	439	16	25884
GO:0006955	immune response	biological_process	0.0031034	0.29947	7	439	114	25884
GO:0016705	oxidoreductase activity, acting on paired donors, with incorporation or reduction of molecular oxygen	molecular_function	0.0034031	0.3217	19	439	539	25884
GO:0002376	immune system process	biological_process	0.0038073	0.35271	8	439	149	25884
GO:0044710	single-organism metabolic process	biological_process	0.0039559	0.3553	114	439	5257	25884
GO:0016747	transferase activity, transferring acyl groups other than amino-acyl groups	molecular_function	0.0039887	0.3553	15	439	395	25884
GO:0030244	cellulose biosynthetic process	biological_process	0.0041193	0.36001	5	439	59	25884
GO:0005777	peroxisome	cellular_component	0.0042967	0.36186	4	439	38	25884
GO:0042579	microbody	cellular_component	0.0042967	0.36186	4	439	38	25884
GO:0019068	virion assembly	biological_process	0.0045206	0.36882	4	439	40	25884
GO:0002831	regulation of response to biotic stimulus	biological_process	0.0045386	0.36882	3	439	21	25884
GO:0004857	enzyme inhibitor activity	molecular_function	0.0048886	0.39041	11	439	282	25884
GO:0051287	NAD binding	molecular_function	0.0052278	0.41043	10	439	218	25884
GO:0002682	regulation of immune system process	biological_process	0.0058075	0.44445	4	439	43	25884
GO:0030243	cellulose metabolic process	biological_process	0.0058531	0.44445	5	439	64	25884
GO:0016746	transferase activity, transferring acyl groups	molecular_function	0.0067655	0.50545	17	439	499	25884
GO:0016051	carbohydrate biosynthetic process	biological_process	0.0072922	0.52982	10	439	229	25884
GO:0015291	secondary active transmembrane transporter activity	molecular_function	0.0073205	0.52982	9	439	193	25884
GO:0003824	catalytic activity	molecular_function	0.0077966	0.55171	250	439	12972	25884
GO:0031347	regulation of defense response	biological_process	0.0078612	0.55171	3	439	25	25884
GO:0016559	peroxisome fission	biological_process	0.0090025	0.62238	2	439	9	25884
GO:0008152	metabolic process	biological_process	0.009273	0.62932	265	439	14041	25884
GO:0051274	beta-glucan biosynthetic process	biological_process	0.0093746	0.62932	5	439	72	25884
GO:0003857	3-hydroxyacyl-CoA dehydrogenase activity	molecular_function	0.010031	0.66375	5	439	76	25884
GO:0008716	D-alanine-D-alanine ligase activity	molecular_function	0.010745	0.70101	2	439	9	25884
GO:0015297	antiporter activity	molecular_function	0.011099	0.70465	7	439	136	25884
GO:0005506	iron ion binding	molecular_function	0.011105	0.70465	16	439	486	25884
GO:0016798	hydrolase activity, acting on glycosyl bonds	molecular_function	0.011647	0.72905	21	439	702	25884
GO:0010333	terpene synthase activity	molecular_function	0.012135	0.73519	4	439	52	25884
GO:0005975	carbohydrate metabolic process	biological_process	0.012195	0.73519	33	439	1250	25884
GO:0051273	beta-glucan metabolic process	biological_process	0.012365	0.73519	5	439	77	25884
GO:0044262	cellular carbohydrate metabolic process	biological_process	0.01238	0.73519	9	439	212	25884
GO:0044711	single-organism biosynthetic process	biological_process	0.013119	0.76919	38	439	1509	25884
GO:0009250	glucan biosynthetic process	biological_process	0.013648	0.79022	5	439	79	25884
GO:0003989	acetyl-CoA carboxylase activity	molecular_function	0.014466	0.80733	2	439	11	25884
GO:0016421	CoA carboxylase activity	molecular_function	0.014466	0.80733	2	439	11	25884
GO:0016885	ligase activity, forming carbon-carbon bonds	molecular_function	0.014466	0.80733	2	439	11	25884
GO:0008171	O-methyltransferase activity	molecular_function	0.014777	0.81484	6	439	116	25884
GO:0009311	oligosaccharide metabolic process	biological_process	0.015588	0.84947	6	439	114	25884
GO:0009877	nodulation	biological_process	0.016031	0.86344	4	439	58	25884
GO:0016838	carbon-oxygen lyase activity, acting on phosphates	molecular_function	0.017691	0.86995	4	439	58	25884
GO:0010340	carboxyl-O-methyltransferase activity	molecular_function	0.018019	0.86995	4	439	58	25884
GO:0051998	protein carboxyl O-methyltransferase activity	molecular_function	0.018019	0.86995	4	439	58	25884
GO:0002685	regulation of leukocyte migration	biological_process	0.018211	0.86995	1	439	1	25884
GO:0050853	B cell receptor signaling pathway	biological_process	0.018211	0.86995	1	439	1	25884
GO:0050854	regulation of antigen receptor-mediated signaling pathway	biological_process	0.018211	0.86995	1	439	1	25884
GO:0050855	regulation of B cell receptor signaling pathway	biological_process	0.018211	0.86995	1	439	1	25884
GO:0050900	leukocyte migration	biological_process	0.018211	0.86995	1	439	1	25884
GO:0072676	lymphocyte migration	biological_process	0.018211	0.86995	1	439	1	25884
GO:2000401	regulation of lymphocyte migration	biological_process	0.018211	0.86995	1	439	1	25884
GO:0004511	tyrosine 3-monooxygenase activity	molecular_function	0.018218	0.86995	1	439	1	25884
GO:0003997	acyl-CoA oxidase activity	molecular_function	0.018745	0.88598	2	439	12	25884
GO:0042221	response to chemical	biological_process	0.019046	0.89112	12	439	362	25884
GO:0005516	calmodulin binding	molecular_function	0.019687	0.91191	4	439	59	25884
GO:0019887	protein kinase regulator activity	molecular_function	0.021075	0.95958	3	439	36	25884
GO:0006635	fatty acid beta-oxidation	biological_process	0.021949	0.95958	2	439	13	25884
GO:0009062	fatty acid catabolic process	biological_process	0.021949	0.95958	2	439	13	25884
GO:0019395	fatty acid oxidation	biological_process	0.021949	0.95958	2	439	13	25884
GO:0034440	lipid oxidation	biological_process	0.021949	0.95958	2	439	13	25884
GO:0008150	biological_process	biological_process	0.021959	0.95958	339	439	18791	25884
GO:0080134	regulation of response to stress	biological_process	0.022958	0.97255	3	439	37	25884
GO:0001071	nucleic acid binding transcription factor activity	molecular_function	0.023821	0.97255	27	439	1060	25884
GO:0003700	transcription factor activity, sequence-specific DNA binding	molecular_function	0.023821	0.97255	27	439	1060	25884
GO:0003674	molecular_function	molecular_function	0.02395	0.97255	402	439	22810	25884
GO:0006073	cellular glucan metabolic process	biological_process	0.023998	0.97255	6	439	128	25884
GO:0044042	glucan metabolic process	biological_process	0.023998	0.97255	6	439	128	25884
GO:0009312	oligosaccharide biosynthetic process	biological_process	0.024041	0.97255	5	439	93	25884
GO:0005310	dicarboxylic acid transmembrane transporter activity	molecular_function	0.024211	0.97255	2	439	14	25884
GO:0048870	cell motility	biological_process	0.025397	0.97255	5	439	98	25884
GO:0051674	localization of cell	biological_process	0.025397	0.97255	5	439	98	25884
GO:0033692	cellular polysaccharide biosynthetic process	biological_process	0.026122	0.97255	5	439	94	25884
GO:0016836	hydro-lyase activity	molecular_function	0.026828	0.97255	6	439	134	25884
GO:0016538	cyclin-dependent protein serine/threonine kinase regulator activity	molecular_function	0.026996	0.97255	2	439	16	25884
GO:0016533	cyclin-dependent protein kinase 5 holoenzyme complex	cellular_component	0.027142	0.97255	1	439	2	25884
GO:0016534	cyclin-dependent protein kinase 5 activator activity	molecular_function	0.027142	0.97255	1	439	2	25884
GO:0019209	kinase activator activity	molecular_function	0.027142	0.97255	1	439	2	25884
GO:0030295	protein kinase activator activity	molecular_function	0.027142	0.97255	1	439	2	25884
GO:0043539	protein serine/threonine kinase activator activity	molecular_function	0.027142	0.97255	1	439	2	25884
GO:0016157	sucrose synthase activity	molecular_function	0.028492	0.97255	2	439	15	25884
GO:0000735	removal of nonhomologous ends	biological_process	0.028555	0.97255	1	439	2	25884
GO:0000736	double-strand break repair via single-strand annealing, removal of nonhomologous ends	biological_process	0.028555	0.97255	1	439	2	25884
GO:0006312	mitotic recombination	biological_process	0.028555	0.97255	1	439	2	25884
GO:0007533	mating type switching	biological_process	0.028555	0.97255	1	439	2	25884
GO:0007534	gene conversion at mating-type locus	biological_process	0.028555	0.97255	1	439	2	25884
GO:0022413	reproductive process in single-celled organism	biological_process	0.028555	0.97255	1	439	2	25884
GO:0035822	gene conversion	biological_process	0.028555	0.97255	1	439	2	25884
GO:0045002	double-strand break repair via single-strand annealing	biological_process	0.028555	0.97255	1	439	2	25884
GO:0070336	flap-structured DNA binding	molecular_function	0.028555	0.97255	1	439	2	25884
GO:0044242	cellular lipid catabolic process	biological_process	0.028726	0.97255	2	439	15	25884
GO:0042546	cell wall biogenesis	biological_process	0.028828	0.97255	3	439	38	25884
GO:0005544	calcium-dependent phospholipid binding	molecular_function	0.028959	0.97255	2	439	16	25884
GO:0072329	monocarboxylic acid catabolic process	biological_process	0.028975	0.97255	2	439	15	25884
GO:0030151	molybdenum ion binding	molecular_function	0.029496	0.97719	2	439	16	25884
GO:0034637	cellular carbohydrate biosynthetic process	biological_process	0.029535	0.97719	6	439	131	25884
GO:0030258	lipid modification	biological_process	0.032075	1	4	439	68	25884
GO:0050662	coenzyme binding	molecular_function	0.032771	1	22	439	829	25884
GO:0005343	organic acid:sodium symporter activity	molecular_function	0.033549	1	2	439	17	25884
GO:0031532	actin cytoskeleton reorganization	biological_process	0.036105	1	1	439	2	25884
GO:0090630	activation of GTPase activity	biological_process	0.036105	1	1	439	2	25884
GO:0016714	oxidoreductase activity, acting on paired donors, with incorporation or reduction of molecular oxygen, reduced pteridine as one donor, and incorporation of one atom of oxygen	molecular_function	0.036105	1	1	439	2	25884
GO:0004799	thymidylate synthase activity	molecular_function	0.036105	1	1	439	2	25884
GO:0006801	superoxide metabolic process	biological_process	0.037235	1	2	439	19	25884
GO:0072593	reactive oxygen species metabolic process	biological_process	0.037235	1	2	439	19	25884
GO:0044264	cellular polysaccharide metabolic process	biological_process	0.038068	1	6	439	143	25884
GO:0005779	integral component of peroxisomal membrane	cellular_component	0.038096	1	2	439	18	25884
GO:0031231	intrinsic component of peroxisomal membrane	cellular_component	0.038096	1	2	439	18	25884
GO:0043565	sequence-specific DNA binding	molecular_function	0.038598	1	15	439	526	25884
GO:0000271	polysaccharide biosynthetic process	biological_process	0.0386	1	5	439	105	25884
GO:0098772	molecular function regulator	molecular_function	0.039	1	17	439	638	25884
GO:0004553	hydrolase activity, hydrolyzing O-glycosyl compounds	molecular_function	0.039873	1	18	439	658	25884
GO:0005985	sucrose metabolic process	biological_process	0.040312	1	2	439	18	25884
GO:0022804	active transmembrane transporter activity	molecular_function	0.040943	1	12	439	386	25884
GO:0015296	anion:cation symporter activity	molecular_function	0.041704	1	2	439	19	25884
GO:0019104	DNA N-glycosylase activity	molecular_function	0.041872	1	2	439	19	25884
GO:0005778	peroxisomal membrane	cellular_component	0.042141	1	2	439	19	25884
GO:0031903	microbody membrane	cellular_component	0.042141	1	2	439	19	25884
GO:0044438	microbody part	cellular_component	0.042141	1	2	439	19	25884
GO:0044439	peroxisomal part	cellular_component	0.042141	1	2	439	19	25884
GO:0043900	regulation of multi-organism process	biological_process	0.043742	1	3	439	47	25884
GO:0044723	single-organism carbohydrate metabolic process	biological_process	0.044524	1	15	439	528	25884
GO:0019207	kinase regulator activity	molecular_function	0.046116	1	3	439	49	25884
GO:0003785	actin monomer binding	molecular_function	0.046142	1	1	439	3	25884
GO:0016053	organic acid biosynthetic process	biological_process	0.046852	1	11	439	355	25884
GO:0046394	carboxylic acid biosynthetic process	biological_process	0.046852	1	11	439	355	25884
GO:0009055	electron carrier activity	molecular_function	0.046973	1	10	439	348	25884
GO:0004714	transmembrane receptor protein tyrosine kinase activity	molecular_function	0.048208	1	1	439	3	25884
GO:0004719	protein-L-isoaspartate (D-aspartate) O-methyltransferase activity	molecular_function	0.048616	1	3	439	47	25884
GO:0030234	enzyme regulator activity	molecular_function	0.048753	1	14	439	519	25884
GO:0004126	cytidine deaminase activity	molecular_function	0.051371	1	1	439	3	25884
GO:0006216	cytidine catabolic process	biological_process	0.051371	1	1	439	3	25884
GO:0009164	nucleoside catabolic process	biological_process	0.051371	1	1	439	3	25884
GO:0009972	cytidine deamination	biological_process	0.051371	1	1	439	3	25884
GO:0042454	ribonucleoside catabolic process	biological_process	0.051371	1	1	439	3	25884
GO:0046087	cytidine metabolic process	biological_process	0.051371	1	1	439	3	25884
GO:0046133	pyrimidine ribonucleoside catabolic process	biological_process	0.051371	1	1	439	3	25884
GO:0046135	pyrimidine nucleoside catabolic process	biological_process	0.051371	1	1	439	3	25884
GO:0072529	pyrimidine-containing compound catabolic process	biological_process	0.051371	1	1	439	3	25884
GO:1901658	glycosyl compound catabolic process	biological_process	0.051371	1	1	439	3	25884
GO:0009249	protein lipoylation	biological_process	0.052506	1	1	439	3	25884
GO:0018065	protein-cofactor linkage	biological_process	0.052506	1	1	439	3	25884
GO:0030908	protein splicing	biological_process	0.053049	1	1	439	3	25884
GO:0006545	glycine biosynthetic process	biological_process	0.053163	1	1	439	3	25884
GO:0002429	immune response-activating cell surface receptor signaling pathway	biological_process	0.053315	1	1	439	3	25884
GO:0002757	immune response-activating signal transduction	biological_process	0.053315	1	1	439	3	25884
GO:0002764	immune response-regulating signaling pathway	biological_process	0.053315	1	1	439	3	25884
GO:0002768	immune response-regulating cell surface receptor signaling pathway	biological_process	0.053315	1	1	439	3	25884
GO:0050851	antigen receptor-mediated signaling pathway	biological_process	0.053315	1	1	439	3	25884
GO:0043547	positive regulation of GTPase activity	biological_process	0.053527	1	1	439	3	25884
GO:0000186	activation of MAPKK activity	biological_process	0.053603	1	1	439	3	25884
GO:0001678	cellular glucose homeostasis	biological_process	0.053603	1	1	439	3	25884
GO:0008343	adult feeding behavior	biological_process	0.053603	1	1	439	3	25884
GO:0030534	adult behavior	biological_process	0.053603	1	1	439	3	25884
GO:0032094	response to food	biological_process	0.053603	1	1	439	3	25884
GO:0032095	regulation of response to food	biological_process	0.053603	1	1	439	3	25884
GO:0032096	negative regulation of response to food	biological_process	0.053603	1	1	439	3	25884
GO:0032098	regulation of appetite	biological_process	0.053603	1	1	439	3	25884
GO:0032099	negative regulation of appetite	biological_process	0.053603	1	1	439	3	25884
GO:0032104	regulation of response to extracellular stimulus	biological_process	0.053603	1	1	439	3	25884
GO:0032105	negative regulation of response to extracellular stimulus	biological_process	0.053603	1	1	439	3	25884
GO:0032107	regulation of response to nutrient levels	biological_process	0.053603	1	1	439	3	25884
GO:0032108	negative regulation of response to nutrient levels	biological_process	0.053603	1	1	439	3	25884
GO:0032147	activation of protein kinase activity	biological_process	0.053603	1	1	439	3	25884
GO:0033500	carbohydrate homeostasis	biological_process	0.053603	1	1	439	3	25884
GO:0033674	positive regulation of kinase activity	biological_process	0.053603	1	1	439	3	25884
GO:0042593	glucose homeostasis	biological_process	0.053603	1	1	439	3	25884
GO:0044708	single-organism behavior	biological_process	0.053603	1	1	439	3	25884
GO:0045860	positive regulation of protein kinase activity	biological_process	0.053603	1	1	439	3	25884
GO:0051347	positive regulation of transferase activity	biological_process	0.053603	1	1	439	3	25884
GO:0006231	dTMP biosynthetic process	biological_process	0.053666	1	1	439	3	25884
GO:0042083	5,10-methylenetetrahydrofolate-dependent methyltransferase activity	molecular_function	0.053666	1	1	439	3	25884
GO:0046073	dTMP metabolic process	biological_process	0.053666	1	1	439	3	25884
GO:0005275	amine transmembrane transporter activity	molecular_function	0.053666	1	1	439	3	25884
GO:0015101	organic cation transmembrane transporter activity	molecular_function	0.053666	1	1	439	3	25884
GO:0015665	alcohol transmembrane transporter activity	molecular_function	0.053666	1	1	439	3	25884
GO:0015695	organic cation transport	biological_process	0.053666	1	1	439	3	25884
GO:0015837	amine transport	biological_process	0.053666	1	1	439	3	25884
GO:0034228	ethanolamine transmembrane transporter activity	molecular_function	0.053666	1	1	439	3	25884
GO:0034229	ethanolamine transport	biological_process	0.053666	1	1	439	3	25884
GO:0009539	photosystem II reaction center	cellular_component	0.054314	1	3	439	54	25884
GO:0008194	UDP-glycosyltransferase activity	molecular_function	0.054337	1	7	439	193	25884
GO:0015370	solute:sodium symporter activity	molecular_function	0.055245	1	2	439	22	25884
GO:0007031	peroxisome organization	biological_process	0.05538	1	2	439	22	25884
GO:0006835	dicarboxylic acid transport	biological_process	0.056793	1	3	439	50	25884
GO:0007530	sex determination	biological_process	0.057283	1	1	439	4	25884
GO:0007531	mating type determination	biological_process	0.057283	1	1	439	4	25884
GO:0045165	cell fate commitment	biological_process	0.057283	1	1	439	4	25884
GO:0004623	phospholipase A2 activity	molecular_function	0.058226	1	1	439	4	25884
GO:0008236	serine-type peptidase activity	molecular_function	0.058358	1	12	439	407	25884
GO:0017171	serine hydrolase activity	molecular_function	0.058358	1	12	439	407	25884
GO:0004683	calmodulin-dependent protein kinase activity	molecular_function	0.061097	1	1	439	4	25884
GO:0044036	cell wall macromolecule metabolic process	biological_process	0.061579	1	2	439	25	25884
GO:0016153	urocanate hydratase activity	molecular_function	0.061709	1	1	439	4	25884
GO:0031514	motile cilium	cellular_component	0.061872	1	3	439	53	25884
GO:0005143	interleukin-12 receptor binding	molecular_function	0.06225	1	1	439	4	25884
GO:0006664	glycolipid metabolic process	biological_process	0.062784	1	6	439	162	25884
GO:0008009	chemokine activity	molecular_function	0.064013	1	1	439	4	25884
GO:0042379	chemokine receptor binding	molecular_function	0.064013	1	1	439	4	25884
GO:0018196	peptidyl-asparagine modification	biological_process	0.064228	1	1	439	4	25884
GO:0018279	protein N-linked glycosylation via asparagine	biological_process	0.064228	1	1	439	4	25884
GO:0006778	porphyrin-containing compound metabolic process	biological_process	0.064934	1	6	439	163	25884
GO:0005313	L-glutamate transmembrane transporter activity	molecular_function	0.066344	1	1	439	4	25884
GO:0015172	acidic amino acid transmembrane transporter activity	molecular_function	0.066344	1	1	439	4	25884
GO:0015501	glutamate:sodium symporter activity	molecular_function	0.066344	1	1	439	4	25884
GO:0015800	acidic amino acid transport	biological_process	0.066344	1	1	439	4	25884
GO:0015807	L-amino acid transport	biological_process	0.066344	1	1	439	4	25884
GO:0015813	L-glutamate transport	biological_process	0.066344	1	1	439	4	25884
GO:0004656	procollagen-proline 4-dioxygenase activity	molecular_function	0.066576	1	1	439	4	25884
GO:0019798	procollagen-proline dioxygenase activity	molecular_function	0.066576	1	1	439	4	25884
GO:0031543	peptidyl-proline dioxygenase activity	molecular_function	0.066576	1	1	439	4	25884
GO:0031545	peptidyl-proline 4-dioxygenase activity	molecular_function	0.066576	1	1	439	4	25884
GO:0009237	siderophore metabolic process	biological_process	0.067821	1	1	439	4	25884
GO:0015343	siderophore transmembrane transporter activity	molecular_function	0.067821	1	1	439	4	25884
GO:0015603	iron chelate transmembrane transporter activity	molecular_function	0.067821	1	1	439	4	25884
GO:0019290	siderophore biosynthetic process	biological_process	0.067821	1	1	439	4	25884
GO:0042927	siderophore transporter activity	molecular_function	0.067821	1	1	439	4	25884
GO:0030354	melanin-concentrating hormone activity	molecular_function	0.068205	1	1	439	4	25884
GO:0004109	coproporphyrinogen oxidase activity	molecular_function	0.069221	1	1	439	4	25884
GO:0000154	rRNA modification	biological_process	0.07005	1	2	439	25	25884
GO:0031167	rRNA methylation	biological_process	0.07005	1	2	439	25	25884
GO:0004620	phospholipase activity	molecular_function	0.070665	1	2	439	25	25884
GO:0009129	pyrimidine nucleoside monophosphate metabolic process	biological_process	0.070909	1	1	439	4	25884
GO:0009130	pyrimidine nucleoside monophosphate biosynthetic process	biological_process	0.070909	1	1	439	4	25884
GO:0009157	deoxyribonucleoside monophosphate biosynthetic process	biological_process	0.070909	1	1	439	4	25884
GO:0009162	deoxyribonucleoside monophosphate metabolic process	biological_process	0.070909	1	1	439	4	25884
GO:0009176	pyrimidine deoxyribonucleoside monophosphate metabolic process	biological_process	0.070909	1	1	439	4	25884
GO:0009177	pyrimidine deoxyribonucleoside monophosphate biosynthetic process	biological_process	0.070909	1	1	439	4	25884
GO:0009221	pyrimidine deoxyribonucleotide biosynthetic process	biological_process	0.070909	1	1	439	4	25884
GO:0009263	deoxyribonucleotide biosynthetic process	biological_process	0.070909	1	1	439	4	25884
GO:0009265	2'-deoxyribonucleotide biosynthetic process	biological_process	0.070909	1	1	439	4	25884
GO:0046385	deoxyribose phosphate biosynthetic process	biological_process	0.070909	1	1	439	4	25884
GO:0005984	disaccharide metabolic process	biological_process	0.072267	1	3	439	54	25884
GO:0048583	regulation of response to stimulus	biological_process	0.076712	1	5	439	132	25884
GO:0005929	cilium	cellular_component	0.077496	1	3	439	58	25884
GO:1901565	organonitrogen compound catabolic process	biological_process	0.079328	1	5	439	135	25884
GO:0006505	GPI anchor metabolic process	biological_process	0.079456	1	5	439	132	25884
GO:0004853	uroporphyrinogen decarboxylase activity	molecular_function	0.0816	1	1	439	5	25884
GO:0044038	cell wall macromolecule biosynthetic process	biological_process	0.08168	1	1	439	5	25884
GO:0070589	cellular component macromolecule biosynthetic process	biological_process	0.08168	1	1	439	5	25884
GO:0016799	hydrolase activity, hydrolyzing N-glycosyl compounds	molecular_function	0.081848	1	2	439	28	25884
GO:0008272	sulfate transport	biological_process	0.082519	1	2	439	27	25884
GO:0015116	sulfate transmembrane transporter activity	molecular_function	0.082519	1	2	439	27	25884
GO:1903509	liposaccharide metabolic process	biological_process	0.084219	1	6	439	175	25884
GO:0015996	chlorophyll catabolic process	biological_process	0.084567	1	3	439	61	25884
GO:0047746	chlorophyllase activity	molecular_function	0.084567	1	3	439	61	25884
GO:0048037	cofactor binding	molecular_function	0.087305	1	23	439	977	25884
GO:0017153	sodium:dicarboxylate symporter activity	molecular_function	0.087369	1	1	439	5	25884
GO:0046149	pigment catabolic process	biological_process	0.087834	1	3	439	62	25884
GO:1901618	organic hydroxy compound transmembrane transporter activity	molecular_function	0.087838	1	1	439	5	25884
GO:1901682	sulfur compound transmembrane transporter activity	molecular_function	0.087998	1	2	439	28	25884
GO:0006643	membrane lipid metabolic process	biological_process	0.088187	1	6	439	177	25884
GO:0006480	N-terminal protein amino acid methylation	biological_process	0.088656	1	2	439	29	25884
GO:0031365	N-terminal protein amino acid modification	biological_process	0.088656	1	2	439	29	25884
GO:0006355	regulation of transcription, DNA-templated	biological_process	0.090595	1	48	439	2301	25884
GO:1903506	regulation of nucleic acid-templated transcription	biological_process	0.090595	1	48	439	2301	25884
GO:0046992	oxidoreductase activity, acting on X-H and Y-H to form an X-Y bond	molecular_function	0.091698	1	1	439	6	25884
GO:0050485	oxidoreductase activity, acting on X-H and Y-H to form an X-Y bond, with a disulfide as acceptor	molecular_function	0.091698	1	1	439	6	25884
GO:0072348	sulfur compound transport	biological_process	0.09357	1	2	439	29	25884
GO:0000702	oxidized base lesion DNA N-glycosylase activity	molecular_function	0.093625	1	1	439	6	25884
GO:0008534	oxidized purine nucleobase lesion DNA N-glycosylase activity	molecular_function	0.093625	1	1	439	6	25884
GO:0004197	cysteine-type endopeptidase activity	molecular_function	0.093832	1	5	439	139	25884
GO:2001141	regulation of RNA biosynthetic process	biological_process	0.094109	1	48	439	2308	25884
GO:0009405	pathogenesis	biological_process	0.094499	1	9	439	313	25884
GO:0043085	positive regulation of catalytic activity	biological_process	0.094835	1	2	439	31	25884
GO:0007167	enzyme linked receptor protein signaling pathway	biological_process	0.094966	1	1	439	6	25884
GO:0007169	transmembrane receptor protein tyrosine kinase signaling pathway	biological_process	0.094966	1	1	439	6	25884
GO:0051252	regulation of RNA metabolic process	biological_process	0.095138	1	48	439	2310	25884
GO:0003972	RNA ligase (ATP) activity	molecular_function	0.095571	1	1	439	6	25884
GO:0016757	transferase activity, transferring glycosyl groups	molecular_function	0.096422	1	19	439	783	25884
GO:0046488	phosphatidylinositol metabolic process	biological_process	0.097288	1	6	439	181	25884
GO:0005976	polysaccharide metabolic process	biological_process	0.098503	1	6	439	182	25884
GO:0008685	2-C-methyl-D-erythritol 2,4-cyclodiphosphate synthase activity	molecular_function	0.099006	1	1	439	6	25884
GO:0044699	single-organism process	biological_process	0.10088	1	184	439	9947	25884
GO:0006787	porphyrin-containing compound catabolic process	biological_process	0.10098	1	3	439	66	25884
GO:0033015	tetrapyrrole catabolic process	biological_process	0.10098	1	3	439	66	25884
GO:0098542	defense response to other organism	biological_process	0.10232	1	5	439	148	25884
GO:0016829	lyase activity	molecular_function	0.10299	1	14	439	558	25884
GO:0004146	dihydrofolate reductase activity	molecular_function	0.10311	1	1	439	6	25884
GO:0016645	oxidoreductase activity, acting on the CH-NH group of donors	molecular_function	0.10374	1	3	439	65	25884
GO:0006544	glycine metabolic process	biological_process	0.10391	1	1	439	6	25884
GO:0070588	calcium ion transmembrane transport	biological_process	0.10446	1	1	439	6	25884
GO:0051187	cofactor catabolic process	biological_process	0.10463	1	3	439	67	25884
GO:0042025	host cell nucleus	cellular_component	0.10509	1	3	439	67	25884
GO:0016042	lipid catabolic process	biological_process	0.1055	1	3	439	65	25884
GO:0015179	L-amino acid transmembrane transporter activity	molecular_function	0.10555	1	1	439	7	25884
GO:1901136	carbohydrate derivative catabolic process	biological_process	0.10618	1	3	439	67	25884
GO:0005861	troponin complex	cellular_component	0.1063	1	1	439	7	25884
GO:0005865	striated muscle thin filament	cellular_component	0.1063	1	1	439	7	25884
GO:0030016	myofibril	cellular_component	0.1063	1	1	439	7	25884
GO:0030017	sarcomere	cellular_component	0.1063	1	1	439	7	25884
GO:0036379	myofilament	cellular_component	0.1063	1	1	439	7	25884
GO:0043292	contractile fiber	cellular_component	0.1063	1	1	439	7	25884
GO:0044449	contractile fiber part	cellular_component	0.1063	1	1	439	7	25884
GO:0008452	RNA ligase activity	molecular_function	0.10688	1	1	439	7	25884
GO:0019219	regulation of nucleobase-containing compound metabolic process	biological_process	0.10743	1	48	439	2334	25884
GO:0006644	phospholipid metabolic process	biological_process	0.11309	1	7	439	233	25884
GO:0006650	glycerophospholipid metabolic process	biological_process	0.11401	1	6	439	189	25884
GO:0016903	oxidoreductase activity, acting on the aldehyde or oxo group of donors	molecular_function	0.11555	1	4	439	106	25884
GO:0009070	serine family amino acid biosynthetic process	biological_process	0.11613	1	1	439	7	25884
GO:0044093	positive regulation of molecular function	biological_process	0.11731	1	2	439	35	25884
GO:0042126	nitrate metabolic process	biological_process	0.11893	1	1	439	7	25884
GO:0042128	nitrate assimilation	biological_process	0.11893	1	1	439	7	25884
GO:2001057	reactive nitrogen species metabolic process	biological_process	0.11893	1	1	439	7	25884
GO:0009427	bacterial-type flagellum basal body, distal rod, L ring	cellular_component	0.11957	1	1	439	8	25884
GO:0000149	SNARE binding	molecular_function	0.11963	1	1	439	8	25884
GO:0019905	syntaxin binding	molecular_function	0.11963	1	1	439	8	25884
GO:0002253	activation of immune response	biological_process	0.11993	1	1	439	7	25884
GO:0033647	host intracellular organelle	cellular_component	0.12016	1	3	439	71	25884
GO:0033648	host intracellular membrane-bounded organelle	cellular_component	0.12016	1	3	439	71	25884
GO:0008373	sialyltransferase activity	molecular_function	0.12021	1	1	439	7	25884
GO:0004664	prephenate dehydratase activity	molecular_function	0.12047	1	1	439	7	25884
GO:0009094	L-phenylalanine biosynthetic process	biological_process	0.12047	1	1	439	7	25884
GO:1902223	erythrose 4-phosphate/phosphoenolpyruvate family amino acid biosynthetic process	biological_process	0.12047	1	1	439	7	25884
GO:0016886	ligase activity, forming phosphoric ester bonds	molecular_function	0.12109	1	2	439	35	25884
GO:0006508	proteolysis	biological_process	0.12351	1	23	439	1020	25884
GO:0008276	protein methyltransferase activity	molecular_function	0.12432	1	4	439	110	25884
GO:0016758	transferase activity, transferring hexosyl groups	molecular_function	0.12471	1	14	439	566	25884
GO:0071944	cell periphery	cellular_component	0.1253	1	16	439	677	25884
GO:0046700	heterocycle catabolic process	biological_process	0.12745	1	5	439	155	25884
GO:0006302	double-strand break repair	biological_process	0.12814	1	2	439	37	25884
GO:0048584	positive regulation of response to stimulus	biological_process	0.13005	1	2	439	36	25884
GO:0015994	chlorophyll metabolic process	biological_process	0.13026	1	3	439	74	25884
GO:0002684	positive regulation of immune system process	biological_process	0.13104	1	1	439	8	25884
GO:0050778	positive regulation of immune response	biological_process	0.13104	1	1	439	8	25884
GO:0019072	viral genome packaging	biological_process	0.13123	1	1	439	8	25884
GO:0034593	phosphatidylinositol bisphosphate phosphatase activity	molecular_function	0.13235	1	1	439	8	25884
GO:0034596	phosphatidylinositol phosphate 4-phosphatase activity	molecular_function	0.13235	1	1	439	8	25884
GO:0034597	phosphatidylinositol-4,5-bisphosphate 4-phosphatase activity	molecular_function	0.13235	1	1	439	8	25884
GO:0046839	phospholipid dephosphorylation	biological_process	0.13235	1	1	439	8	25884
GO:0046856	phosphatidylinositol dephosphorylation	biological_process	0.13235	1	1	439	8	25884
GO:0052866	phosphatidylinositol phosphate phosphatase activity	molecular_function	0.13235	1	1	439	8	25884
GO:0009219	pyrimidine deoxyribonucleotide metabolic process	biological_process	0.13261	1	1	439	8	25884
GO:0009394	2'-deoxyribonucleotide metabolic process	biological_process	0.13261	1	1	439	8	25884
GO:0019692	deoxyribose phosphate metabolic process	biological_process	0.13261	1	1	439	8	25884
GO:1901361	organic cyclic compound catabolic process	biological_process	0.13278	1	5	439	157	25884
GO:0009426	bacterial-type flagellum basal body, distal rod	cellular_component	0.13562	1	1	439	9	25884
GO:0030545	receptor regulator activity	molecular_function	0.13578	1	1	439	8	25884
GO:0030547	receptor inhibitor activity	molecular_function	0.13578	1	1	439	8	25884
GO:0030548	acetylcholine receptor regulator activity	molecular_function	0.13578	1	1	439	8	25884
GO:0030550	acetylcholine receptor inhibitor activity	molecular_function	0.13578	1	1	439	8	25884
GO:0000313	organellar ribosome	cellular_component	0.13627	1	1	439	9	25884
GO:0005761	mitochondrial ribosome	cellular_component	0.13627	1	1	439	9	25884
GO:0043414	macromolecule methylation	biological_process	0.13761	1	5	439	157	25884
GO:0050840	extracellular matrix binding	molecular_function	0.13762	1	1	439	10	25884
GO:0016881	acid-amino acid ligase activity	molecular_function	0.13813	1	2	439	38	25884
GO:0042158	lipoprotein biosynthetic process	biological_process	0.13821	1	3	439	74	25884
GO:0044270	cellular nitrogen compound catabolic process	biological_process	0.13824	1	5	439	159	25884
GO:0046486	glycerolipid metabolic process	biological_process	0.13847	1	6	439	200	25884
GO:0042995	cell projection	cellular_component	0.13871	1	4	439	117	25884
GO:0009341	beta-galactosidase complex	cellular_component	0.13898	1	2	439	36	25884
GO:0033646	host intracellular part	cellular_component	0.14046	1	3	439	76	25884
GO:0043656	intracellular region of host	cellular_component	0.14046	1	3	439	76	25884
GO:0016646	oxidoreductase activity, acting on the CH-NH group of donors, NAD or NADP as acceptor	molecular_function	0.14084	1	2	439	38	25884
GO:0019439	aromatic compound catabolic process	biological_process	0.14415	1	5	439	161	25884
GO:0008158	hedgehog receptor activity	molecular_function	0.14602	1	1	439	9	25884
GO:0034464	BBSome	cellular_component	0.14644	1	1	439	9	25884
GO:0006836	neurotransmitter transport	biological_process	0.14646	1	1	439	9	25884
GO:0015293	symporter activity	molecular_function	0.14711	1	2	439	39	25884
GO:0015294	solute:cation symporter activity	molecular_function	0.14711	1	2	439	39	25884
GO:0051301	cell division	biological_process	0.14815	1	6	439	211	25884
GO:0009262	deoxyribonucleotide metabolic process	biological_process	0.1484	1	1	439	9	25884
GO:0018144	RNA-protein covalent cross-linking	biological_process	0.14846	1	1	439	9	25884
GO:0051345	positive regulation of hydrolase activity	biological_process	0.14896	1	1	439	10	25884
GO:0043087	regulation of GTPase activity	biological_process	0.14936	1	1	439	9	25884
GO:0006558	L-phenylalanine metabolic process	biological_process	0.1521	1	1	439	9	25884
GO:1902221	erythrose 4-phosphate/phosphoenolpyruvate family amino acid metabolic process	biological_process	0.1521	1	1	439	9	25884
GO:0040011	locomotion	biological_process	0.15233	1	6	439	213	25884
GO:0015850	organic hydroxy compound transport	biological_process	0.15573	1	1	439	10	25884
GO:0016620	oxidoreductase activity, acting on the aldehyde or oxo group of donors, NAD or NADP as acceptor	molecular_function	0.15678	1	3	439	79	25884
GO:0051704	multi-organism process	biological_process	0.15841	1	28	439	1326	25884
GO:0044380	protein localization to cytoskeleton	biological_process	0.15902	1	1	439	10	25884
GO:0071988	protein localization to spindle pole body	biological_process	0.15902	1	1	439	10	25884
GO:0072698	protein localization to microtubule cytoskeleton	biological_process	0.15902	1	1	439	10	25884
GO:0008234	cysteine-type peptidase activity	molecular_function	0.16006	1	6	439	211	25884
GO:0060429	epithelium development	biological_process	0.16258	1	2	439	42	25884
GO:0043169	cation binding	molecular_function	0.16345	1	72	439	3768	25884
GO:0043207	response to external biotic stimulus	biological_process	0.16361	1	5	439	173	25884
GO:0051707	response to other organism	biological_process	0.16361	1	5	439	173	25884
GO:0004089	carbonate dehydratase activity	molecular_function	0.16385	1	1	439	11	25884
GO:0004861	cyclin-dependent protein serine/threonine kinase inhibitor activity	molecular_function	0.16469	1	1	439	11	25884
GO:0007008	outer mitochondrial membrane organization	biological_process	0.16629	1	1	439	11	25884
GO:0045040	protein import into mitochondrial outer membrane	biological_process	0.16629	1	1	439	11	25884
GO:0090151	establishment of protein localization to mitochondrial membrane	biological_process	0.16629	1	1	439	11	25884
GO:0004565	beta-galactosidase activity	molecular_function	0.16667	1	2	439	41	25884
GO:0004764	shikimate 3-dehydrogenase (NADP+) activity	molecular_function	0.16699	1	1	439	10	25884
GO:0006813	potassium ion transport	biological_process	0.16742	1	5	439	166	25884
GO:0044702	single organism reproductive process	biological_process	0.16743	1	3	439	82	25884
GO:0000165	MAPK cascade	biological_process	0.1677	1	1	439	10	25884
GO:0023014	signal transduction by protein phosphorylation	biological_process	0.1677	1	1	439	10	25884
GO:0043408	regulation of MAPK cascade	biological_process	0.1677	1	1	439	10	25884
GO:0043410	positive regulation of MAPK cascade	biological_process	0.1677	1	1	439	10	25884
GO:0003880	protein C-terminal carboxyl O-methyltransferase activity	molecular_function	0.16937	1	1	439	11	25884
GO:0004671	protein C-terminal S-isoprenylcysteine carboxyl O-methyltransferase activity	molecular_function	0.16937	1	1	439	11	25884
GO:0006481	C-terminal protein methylation	biological_process	0.16937	1	1	439	11	25884
GO:0018410	C-terminal protein amino acid modification	biological_process	0.16937	1	1	439	11	25884
GO:0043687	post-translational protein modification	biological_process	0.16937	1	1	439	11	25884
GO:0004713	protein tyrosine kinase activity	molecular_function	0.1712	1	1	439	11	25884
GO:0000160	phosphorelay signal transduction system	biological_process	0.17179	1	4	439	129	25884
GO:0006364	rRNA processing	biological_process	0.17212	1	4	439	128	25884
GO:0016072	rRNA metabolic process	biological_process	0.17212	1	4	439	128	25884
GO:0019199	transmembrane receptor protein kinase activity	molecular_function	0.17401	1	1	439	11	25884
GO:0018143	nucleic acid-protein covalent cross-linking	biological_process	0.17597	1	1	439	11	25884
GO:0010927	cellular component assembly involved in morphogenesis	biological_process	0.17627	1	1	439	11	25884
GO:0042384	cilium assembly	biological_process	0.17627	1	1	439	11	25884
GO:0060271	cilium morphogenesis	biological_process	0.17627	1	1	439	11	25884
GO:0004478	methionine adenosyltransferase activity	molecular_function	0.17645	1	1	439	11	25884
GO:0006556	S-adenosylmethionine biosynthetic process	biological_process	0.17645	1	1	439	11	25884
GO:0046500	S-adenosylmethionine metabolic process	biological_process	0.17645	1	1	439	11	25884
GO:0000287	magnesium ion binding	molecular_function	0.1765	1	5	439	173	25884
GO:0016477	cell migration	biological_process	0.17709	1	1	439	11	25884
GO:0030334	regulation of cell migration	biological_process	0.17709	1	1	439	11	25884
GO:0051270	regulation of cellular component movement	biological_process	0.17709	1	1	439	11	25884
GO:2000145	regulation of cell motility	biological_process	0.17709	1	1	439	11	25884
GO:0046872	metal ion binding	molecular_function	0.17716	1	71	439	3735	25884
GO:1901576	organic substance biosynthetic process	biological_process	0.17773	1	102	439	5545	25884
GO:0007267	cell-cell signaling	biological_process	0.17856	1	1	439	11	25884
GO:0007268	synaptic transmission	biological_process	0.17856	1	1	439	11	25884
GO:0019239	deaminase activity	molecular_function	0.17865	1	1	439	11	25884
GO:0003906	DNA-(apurinic or apyrimidinic site) lyase activity	molecular_function	0.17893	1	1	439	12	25884
GO:0009523	photosystem II	cellular_component	0.17918	1	4	439	139	25884
GO:0000726	non-recombinational repair	biological_process	0.17927	1	1	439	12	25884
GO:0019184	nonribosomal peptide biosynthetic process	biological_process	0.17982	1	1	439	11	25884
GO:0032102	negative regulation of response to external stimulus	biological_process	0.18001	1	1	439	11	25884
GO:0007631	feeding behavior	biological_process	0.18089	1	1	439	11	25884
GO:0046131	pyrimidine ribonucleoside metabolic process	biological_process	0.18253	1	1	439	13	25884
GO:0005283	sodium:amino acid symporter activity	molecular_function	0.183	1	1	439	12	25884
GO:0005416	cation:amino acid symporter activity	molecular_function	0.183	1	1	439	12	25884
GO:0032259	methylation	biological_process	0.18398	1	5	439	174	25884
GO:0016787	hydrolase activity	molecular_function	0.18404	1	91	439	4804	25884
GO:0005085	guanyl-nucleotide exchange factor activity	molecular_function	0.18477	1	2	439	44	25884
GO:0000003	reproduction	biological_process	0.18504	1	7	439	273	25884
GO:2000112	regulation of cellular macromolecule biosynthetic process	biological_process	0.18746	1	48	439	2450	25884
GO:0003993	acid phosphatase activity	molecular_function	0.18791	1	2	439	45	25884
GO:0009889	regulation of biosynthetic process	biological_process	0.19217	1	48	439	2456	25884
GO:0010556	regulation of macromolecule biosynthetic process	biological_process	0.19217	1	48	439	2456	25884
GO:0031326	regulation of cellular biosynthetic process	biological_process	0.19217	1	48	439	2456	25884
GO:0006979	response to oxidative stress	biological_process	0.19315	1	4	439	139	25884
GO:0016298	lipase activity	molecular_function	0.19386	1	2	439	46	25884
GO:0008725	DNA-3-methyladenine glycosylase activity	molecular_function	0.19496	1	1	439	12	25884
GO:0043733	DNA-3-methylbase glycosylase activity	molecular_function	0.19496	1	1	439	12	25884
GO:0001664	G-protein coupled receptor binding	molecular_function	0.19635	1	1	439	13	25884
GO:0000394	RNA splicing, via endonucleolytic cleavage and ligation	biological_process	0.19646	1	1	439	13	25884
GO:0006388	tRNA splicing, via endonucleolytic cleavage and ligation	biological_process	0.19646	1	1	439	13	25884
GO:0043436	oxoacid metabolic process	biological_process	0.19752	1	19	439	877	25884
GO:0009607	response to biotic stimulus	biological_process	0.19904	1	6	439	244	25884
GO:0051171	regulation of nitrogen compound metabolic process	biological_process	0.19935	1	48	439	2465	25884
GO:0006082	organic acid metabolic process	biological_process	0.19986	1	19	439	879	25884
GO:0044283	small molecule biosynthetic process	biological_process	0.20046	1	11	439	475	25884
GO:0044782	cilium organization	biological_process	0.20208	1	1	439	13	25884
GO:0030291	protein serine/threonine kinase inhibitor activity	molecular_function	0.20236	1	1	439	14	25884
GO:0004601	peroxidase activity	molecular_function	0.20659	1	4	439	140	25884
GO:0003905	alkylbase DNA N-glycosylase activity	molecular_function	0.20747	1	1	439	13	25884
GO:0030694	bacterial-type flagellum basal body, rod	cellular_component	0.20839	1	1	439	14	25884
GO:0044238	primary metabolic process	biological_process	0.20864	1	195	439	10855	25884
GO:0007050	cell cycle arrest	biological_process	0.20908	1	1	439	14	25884
GO:0004097	catechol oxidase activity	molecular_function	0.20955	1	1	439	13	25884
GO:0016054	organic acid catabolic process	biological_process	0.20956	1	2	439	49	25884
GO:0046395	carboxylic acid catabolic process	biological_process	0.20956	1	2	439	49	25884
GO:0003855	3-dehydroquinate dehydratase activity	molecular_function	0.21171	1	1	439	13	25884
GO:0015925	galactosidase activity	molecular_function	0.21196	1	2	439	48	25884
GO:0008233	peptidase activity	molecular_function	0.21335	1	23	439	1109	25884
GO:0008915	lipid-A-disaccharide synthase activity	molecular_function	0.21369	1	1	439	14	25884
GO:0010468	regulation of gene expression	biological_process	0.21647	1	48	439	2485	25884
GO:0015926	glucosidase activity	molecular_function	0.21663	1	1	439	14	25884
GO:0006479	protein methylation	biological_process	0.21737	1	3	439	92	25884
GO:0008213	protein alkylation	biological_process	0.21737	1	3	439	92	25884
GO:0033013	tetrapyrrole metabolic process	biological_process	0.21901	1	6	439	235	25884
GO:0007166	cell surface receptor signaling pathway	biological_process	0.22025	1	3	439	95	25884
GO:0008544	epidermis development	biological_process	0.22118	1	1	439	14	25884
GO:0009425	bacterial-type flagellum basal body	cellular_component	0.22282	1	1	439	15	25884
GO:0040012	regulation of locomotion	biological_process	0.22418	1	1	439	15	25884
GO:0071941	nitrogen cycle metabolic process	biological_process	0.22457	1	1	439	14	25884
GO:0009832	plant-type cell wall biogenesis	biological_process	0.22462	1	1	439	14	25884
GO:0010215	cellulose microfibril organization	biological_process	0.22462	1	1	439	14	25884
GO:0070726	cell wall assembly	biological_process	0.22462	1	1	439	14	25884
GO:0071668	plant-type cell wall assembly	biological_process	0.22462	1	1	439	14	25884
GO:0004435	phosphatidylinositol phospholipase C activity	molecular_function	0.22517	1	1	439	14	25884
GO:0004629	phospholipase C activity	molecular_function	0.22517	1	1	439	14	25884
GO:0009733	response to auxin	biological_process	0.22521	1	2	439	67	25884
GO:0009058	biosynthetic process	biological_process	0.22542	1	105	439	5798	25884
GO:0044712	single-organism catabolic process	biological_process	0.22639	1	7	439	289	25884
GO:0016872	intramolecular lyase activity	molecular_function	0.22681	1	1	439	15	25884
GO:0009267	cellular response to starvation	biological_process	0.22796	1	1	439	18	25884
GO:0031667	response to nutrient levels	biological_process	0.22796	1	1	439	18	25884
GO:0031669	cellular response to nutrient levels	biological_process	0.22796	1	1	439	18	25884
GO:0042594	response to starvation	biological_process	0.22796	1	1	439	18	25884
GO:0007155	cell adhesion	biological_process	0.22932	1	4	439	141	25884
GO:0005507	copper ion binding	molecular_function	0.23328	1	4	439	141	25884
GO:0009095	aromatic amino acid family biosynthetic process, prephenate pathway	biological_process	0.23339	1	1	439	15	25884
GO:0006779	porphyrin-containing compound biosynthetic process	biological_process	0.23449	1	3	439	95	25884
GO:0003006	developmental process involved in reproduction	biological_process	0.23514	1	2	439	55	25884
GO:0030198	extracellular matrix organization	biological_process	0.23875	1	1	439	15	25884
GO:0043062	extracellular structure organization	biological_process	0.23875	1	1	439	15	25884
GO:0009069	serine family amino acid metabolic process	biological_process	0.24126	1	1	439	16	25884
GO:0080090	regulation of primary metabolic process	biological_process	0.24159	1	49	439	2572	25884
GO:0071704	organic substance metabolic process	biological_process	0.24751	1	202	439	11342	25884
GO:0070011	peptidase activity, acting on L-amino acid peptides	molecular_function	0.2478	1	21	439	1027	25884
GO:0031323	regulation of cellular metabolic process	biological_process	0.24811	1	49	439	2582	25884
GO:0019953	sexual reproduction	biological_process	0.24862	1	3	439	100	25884
GO:0019752	carboxylic acid metabolic process	biological_process	0.24882	1	18	439	861	25884
GO:0004568	chitinase activity	molecular_function	0.24897	1	1	439	18	25884
GO:0009247	glycolipid biosynthetic process	biological_process	0.25059	1	3	439	100	25884
GO:0046467	membrane lipid biosynthetic process	biological_process	0.25059	1	3	439	100	25884
GO:0008053	mitochondrial fusion	biological_process	0.25072	1	1	439	18	25884
GO:0080019	fatty-acyl-CoA reductase (alcohol-forming) activity	molecular_function	0.25121	1	1	439	17	25884
GO:0060255	regulation of macromolecule metabolic process	biological_process	0.25396	1	49	439	2586	25884
GO:0006468	protein phosphorylation	biological_process	0.25408	1	35	439	1739	25884
GO:0016684	oxidoreductase activity, acting on peroxide as acceptor	molecular_function	0.25477	1	4	439	153	25884
GO:0044282	small molecule catabolic process	biological_process	0.25508	1	2	439	56	25884
GO:0071840	cellular component organization or biogenesis	biological_process	0.25885	1	39	439	2044	25884
GO:0016998	cell wall macromolecule catabolic process	biological_process	0.26299	1	1	439	19	25884
GO:0022610	biological adhesion	biological_process	0.26304	1	4	439	150	25884
GO:0008509	anion transmembrane transporter activity	molecular_function	0.26354	1	4	439	149	25884
GO:0019882	antigen processing and presentation	biological_process	0.26384	1	1	439	18	25884
GO:0005126	cytokine receptor binding	molecular_function	0.26721	1	2	439	60	25884
GO:1901362	organic cyclic compound biosynthetic process	biological_process	0.26751	1	65	439	3530	25884
GO:0033643	host cell part	cellular_component	0.26962	1	3	439	105	25884
GO:0031012	extracellular matrix	cellular_component	0.27245	1	4	439	162	25884
GO:0005184	neuropeptide hormone activity	molecular_function	0.27455	1	1	439	18	25884
GO:0006032	chitin catabolic process	biological_process	0.27473	1	1	439	20	25884
GO:0046348	amino sugar catabolic process	biological_process	0.27473	1	1	439	20	25884
GO:1901072	glucosamine-containing compound catabolic process	biological_process	0.27473	1	1	439	20	25884
GO:0006213	pyrimidine nucleoside metabolic process	biological_process	0.27544	1	1	439	20	25884
GO:0051302	regulation of cell division	biological_process	0.27574	1	2	439	60	25884
GO:0008107	galactoside 2-alpha-L-fucosyltransferase activity	molecular_function	0.27683	1	1	439	18	25884
GO:0031127	alpha-(1,2)-fucosyltransferase activity	molecular_function	0.27683	1	1	439	18	25884
GO:0016843	amine-lyase activity	molecular_function	0.27685	1	1	439	19	25884
GO:0016844	strictosidine synthase activity	molecular_function	0.27685	1	1	439	19	25884
GO:0032505	reproduction of a single-celled organism	biological_process	0.27717	1	3	439	109	25884
GO:0048284	organelle fusion	biological_process	0.27775	1	1	439	20	25884
GO:0008661	1-deoxy-D-xylulose-5-phosphate synthase activity	molecular_function	0.27914	1	1	439	18	25884
GO:0016744	transferase activity, transferring aldehyde or ketonic groups	molecular_function	0.27914	1	1	439	18	25884
GO:0018995	host	cellular_component	0.27941	1	3	439	107	25884
GO:0043657	host cell	cellular_component	0.27941	1	3	439	107	25884
GO:0044215	other organism	cellular_component	0.27941	1	3	439	107	25884
GO:0044216	other organism cell	cellular_component	0.27941	1	3	439	107	25884
GO:0044217	other organism part	cellular_component	0.27941	1	3	439	107	25884
GO:0006487	protein N-linked glycosylation	biological_process	0.28274	1	1	439	19	25884
GO:0009888	tissue development	biological_process	0.283	1	2	439	61	25884
GO:0034470	ncRNA processing	biological_process	0.28337	1	11	439	516	25884
GO:0007618	mating	biological_process	0.28742	1	1	439	20	25884
GO:0006221	pyrimidine nucleotide biosynthetic process	biological_process	0.28828	1	1	439	21	25884
GO:0043549	regulation of kinase activity	biological_process	0.2883	1	1	439	20	25884
GO:0045859	regulation of protein kinase activity	biological_process	0.2883	1	1	439	20	25884
GO:0006464	cellular protein modification process	biological_process	0.28932	1	48	439	2499	25884
GO:0036211	protein modification process	biological_process	0.28932	1	48	439	2499	25884
GO:0001934	positive regulation of protein phosphorylation	biological_process	0.29105	1	1	439	20	25884
GO:0042327	positive regulation of phosphorylation	biological_process	0.29105	1	1	439	20	25884
GO:0048646	anatomical structure formation involved in morphogenesis	biological_process	0.29182	1	2	439	62	25884
GO:0044550	secondary metabolite biosynthetic process	biological_process	0.29217	1	1	439	20	25884
GO:0004860	protein kinase inhibitor activity	molecular_function	0.29321	1	1	439	21	25884
GO:0019210	kinase inhibitor activity	molecular_function	0.29321	1	1	439	21	25884
GO:0016278	lysine N-methyltransferase activity	molecular_function	0.29425	1	2	439	62	25884
GO:0016279	protein-lysine N-methyltransferase activity	molecular_function	0.29425	1	2	439	62	25884
GO:0018024	histone-lysine N-methyltransferase activity	molecular_function	0.29425	1	2	439	62	25884
GO:0042054	histone methyltransferase activity	molecular_function	0.29425	1	2	439	62	25884
GO:0004520	endodeoxyribonuclease activity	molecular_function	0.29436	1	2	439	62	25884
GO:0003873	6-phosphofructo-2-kinase activity	molecular_function	0.29494	1	1	439	22	25884
GO:0006000	fructose metabolic process	biological_process	0.29494	1	1	439	22	25884
GO:0051188	cofactor biosynthetic process	biological_process	0.29532	1	7	439	310	25884
GO:0003910	DNA ligase (ATP) activity	molecular_function	0.29717	1	1	439	20	25884
GO:0007006	mitochondrial membrane organization	biological_process	0.2989	1	1	439	21	25884
GO:0019069	viral capsid assembly	biological_process	0.29903	1	1	439	21	25884
GO:0016679	oxidoreductase activity, acting on diphenols and related substances as donors	molecular_function	0.30089	1	2	439	65	25884
GO:0016049	cell growth	biological_process	0.30166	1	1	439	20	25884
GO:0007276	gamete generation	biological_process	0.30349	1	2	439	64	25884
GO:0001510	RNA methylation	biological_process	0.30477	1	2	439	64	25884
GO:0006413	translational initiation	biological_process	0.30482	1	2	439	69	25884
GO:0016624	oxidoreductase activity, acting on the aldehyde or oxo group of donors, disulfide as acceptor	molecular_function	0.30706	1	1	439	20	25884
GO:0051186	cofactor metabolic process	biological_process	0.30755	1	10	439	475	25884
GO:0030474	spindle pole body duplication	biological_process	0.30785	1	1	439	21	25884
GO:0051300	spindle pole body organization	biological_process	0.30785	1	1	439	21	25884
GO:0005125	cytokine activity	molecular_function	0.30811	1	1	439	22	25884
GO:0015849	organic acid transport	biological_process	0.31114	1	4	439	163	25884
GO:0046942	carboxylic acid transport	biological_process	0.31114	1	4	439	163	25884
GO:0006030	chitin metabolic process	biological_process	0.31282	1	1	439	23	25884
GO:1901071	glucosamine-containing compound metabolic process	biological_process	0.31282	1	1	439	23	25884
GO:0006026	aminoglycan catabolic process	biological_process	0.31368	1	1	439	23	25884
GO:0031225	anchored component of membrane	cellular_component	0.31372	1	1	439	21	25884
GO:0000155	phosphorelay sensor kinase activity	molecular_function	0.31474	1	2	439	64	25884
GO:0015711	organic anion transport	biological_process	0.31482	1	4	439	164	25884
GO:0009653	anatomical structure morphogenesis	biological_process	0.31552	1	4	439	165	25884
GO:0004526	ribonuclease P activity	molecular_function	0.31621	1	1	439	23	25884
GO:0019222	regulation of metabolic process	biological_process	0.31633	1	50	439	2712	25884
GO:0005337	nucleoside transmembrane transporter activity	molecular_function	0.31649	1	1	439	22	25884
GO:0006928	movement of cell or subcellular component	biological_process	0.31659	1	5	439	215	25884
GO:0009605	response to external stimulus	biological_process	0.31729	1	6	439	277	25884
GO:0005730	nucleolus	cellular_component	0.31777	1	1	439	22	25884
GO:0042254	ribosome biogenesis	biological_process	0.31785	1	4	439	170	25884
GO:0003995	acyl-CoA dehydrogenase activity	molecular_function	0.31947	1	1	439	21	25884
GO:0044461	bacterial-type flagellum part	cellular_component	0.32085	1	1	439	23	25884
GO:0048585	negative regulation of response to stimulus	biological_process	0.32305	1	1	439	22	25884
GO:0016849	phosphorus-oxygen lyase activity	molecular_function	0.32408	1	1	439	23	25884
GO:0016840	carbon-nitrogen lyase activity	molecular_function	0.32409	1	1	439	23	25884
GO:0000921	septin ring assembly	biological_process	0.32476	1	1	439	22	25884
GO:0005940	septin ring	cellular_component	0.32476	1	1	439	22	25884
GO:0031106	septin ring organization	biological_process	0.32476	1	1	439	22	25884
GO:0032156	septin cytoskeleton	cellular_component	0.32476	1	1	439	22	25884
GO:0032185	septin cytoskeleton organization	biological_process	0.32476	1	1	439	22	25884
GO:0009878	nodule morphogenesis	biological_process	0.32528	1	1	439	25	25884
GO:0009886	post-embryonic morphogenesis	biological_process	0.32528	1	1	439	25	25884
GO:0044111	development involved in symbiotic interaction	biological_process	0.32528	1	1	439	25	25884
GO:0009245	lipid A biosynthetic process	biological_process	0.32547	1	1	439	23	25884
GO:0046493	lipid A metabolic process	biological_process	0.32547	1	1	439	23	25884
GO:1901269	lipooligosaccharide metabolic process	biological_process	0.32547	1	1	439	23	25884
GO:1901271	lipooligosaccharide biosynthetic process	biological_process	0.32547	1	1	439	23	25884
GO:1902533	positive regulation of intracellular signal transduction	biological_process	0.32575	1	1	439	22	25884
GO:0005759	mitochondrial matrix	cellular_component	0.32676	1	1	439	24	25884
GO:0000808	origin recognition complex	cellular_component	0.32692	1	1	439	24	25884
GO:0015081	sodium ion transmembrane transporter activity	molecular_function	0.32786	1	2	439	68	25884
GO:0006816	calcium ion transport	biological_process	0.32917	1	1	439	23	25884
GO:0044403	symbiosis, encompassing mutualism through parasitism	biological_process	0.32973	1	12	439	592	25884
GO:0004616	phosphogluconate dehydrogenase (decarboxylating) activity	molecular_function	0.33101	1	2	439	67	25884
GO:0015103	inorganic anion transmembrane transporter activity	molecular_function	0.33191	1	2	439	68	25884
GO:0000184	nuclear-transcribed mRNA catabolic process, nonsense-mediated decay	biological_process	0.33236	1	1	439	23	25884
GO:0009725	response to hormone	biological_process	0.33255	1	3	439	130	25884
GO:0042398	cellular modified amino acid biosynthetic process	biological_process	0.33271	1	2	439	68	25884
GO:0033179	proton-transporting V-type ATPase, V0 domain	cellular_component	0.33298	1	2	439	72	25884
GO:0006220	pyrimidine nucleotide metabolic process	biological_process	0.33558	1	1	439	25	25884
GO:0070851	growth factor receptor binding	molecular_function	0.33863	1	1	439	25	25884
GO:0044085	cellular component biogenesis	biological_process	0.33888	1	16	439	835	25884
GO:0006820	anion transport	biological_process	0.33924	1	6	439	277	25884
GO:0030436	asexual sporulation	biological_process	0.33927	1	1	439	24	25884
GO:0042157	lipoprotein metabolic process	biological_process	0.34151	1	3	439	122	25884
GO:0016814	hydrolase activity, acting on carbon-nitrogen (but not peptide) bonds, in cyclic amidines	molecular_function	0.34241	1	1	439	24	25884
GO:0004672	protein kinase activity	molecular_function	0.34416	1	36	439	1874	25884
GO:0044419	interspecies interaction between organisms	biological_process	0.34454	1	12	439	599	25884
GO:0008654	phospholipid biosynthetic process	biological_process	0.34494	1	3	439	120	25884
GO:0009664	plant-type cell wall organization	biological_process	0.34524	1	1	439	25	25884
GO:0071669	plant-type cell wall organization or biogenesis	biological_process	0.34524	1	1	439	25	25884
GO:0004549	tRNA-specific ribonuclease activity	molecular_function	0.34814	1	1	439	26	25884
GO:0016755	transferase activity, transferring amino-acyl groups	molecular_function	0.34875	1	1	439	25	25884
GO:2001070	starch binding	molecular_function	0.34897	1	1	439	25	25884
GO:0006497	protein lipidation	biological_process	0.35029	1	2	439	71	25884
GO:0006506	GPI anchor biosynthetic process	biological_process	0.35029	1	2	439	71	25884
GO:0006661	phosphatidylinositol biosynthetic process	biological_process	0.35029	1	2	439	71	25884
GO:0008417	fucosyltransferase activity	molecular_function	0.35212	1	1	439	24	25884
GO:0001503	ossification	biological_process	0.35435	1	1	439	25	25884
GO:0030029	actin filament-based process	biological_process	0.35926	1	2	439	73	25884
GO:0030036	actin cytoskeleton organization	biological_process	0.35926	1	2	439	73	25884
GO:1990542	mitochondrial transmembrane transport	biological_process	0.36256	1	1	439	26	25884
GO:0010562	positive regulation of phosphorus metabolic process	biological_process	0.36466	1	1	439	26	25884
GO:0031401	positive regulation of protein modification process	biological_process	0.36466	1	1	439	26	25884
GO:0045937	positive regulation of phosphate metabolic process	biological_process	0.36466	1	1	439	26	25884
GO:0005509	calcium ion binding	molecular_function	0.36664	1	8	439	408	25884
GO:0009521	photosystem	cellular_component	0.36779	1	4	439	196	25884
GO:0009073	aromatic amino acid family biosynthetic process	biological_process	0.36827	1	1	439	26	25884
GO:0016310	phosphorylation	biological_process	0.36979	1	36	439	1902	25884
GO:0009791	post-embryonic development	biological_process	0.36995	1	1	439	29	25884
GO:0005342	organic acid transmembrane transporter activity	molecular_function	0.37208	1	2	439	74	25884
GO:0046943	carboxylic acid transmembrane transporter activity	molecular_function	0.37208	1	2	439	74	25884
GO:0009719	response to endogenous stimulus	biological_process	0.37212	1	3	439	138	25884
GO:0004488	methylenetetrahydrofolate dehydrogenase (NADP+) activity	molecular_function	0.37265	1	1	439	27	25884
GO:0044801	single-organism membrane fusion	biological_process	0.3727	1	1	439	28	25884
GO:0072527	pyrimidine-containing compound metabolic process	biological_process	0.37299	1	2	439	77	25884
GO:0016682	oxidoreductase activity, acting on diphenols and related substances as donors, oxygen as acceptor	molecular_function	0.37413	1	1	439	26	25884
GO:0008483	transaminase activity	molecular_function	0.37551	1	1	439	27	25884
GO:0048609	multicellular organismal reproductive process	biological_process	0.37664	1	2	439	76	25884
GO:0010496	intercellular transport	biological_process	0.37672	1	1	439	29	25884
GO:0044000	movement in host	biological_process	0.37672	1	1	439	29	25884
GO:0046739	transport of virus in multicellular host	biological_process	0.37672	1	1	439	29	25884
GO:0046740	transport of virus in host, cell to cell	biological_process	0.37672	1	1	439	29	25884
GO:0051814	movement in other organism involved in symbiotic interaction	biological_process	0.37672	1	1	439	29	25884
GO:1902586	multi-organism intercellular transport	biological_process	0.37672	1	1	439	29	25884
GO:0046677	response to antibiotic	biological_process	0.3781	1	1	439	27	25884
GO:0044463	cell projection part	cellular_component	0.37981	1	1	439	28	25884
GO:0048856	anatomical structure development	biological_process	0.37983	1	5	439	236	25884
GO:0002064	epithelial cell development	biological_process	0.38043	1	1	439	28	25884
GO:0002065	columnar/cuboidal epithelial cell differentiation	biological_process	0.38043	1	1	439	28	25884
GO:0002066	columnar/cuboidal epithelial cell development	biological_process	0.38043	1	1	439	28	25884
GO:0005213	structural constituent of chorion	molecular_function	0.38043	1	1	439	28	25884
GO:0007292	female gamete generation	biological_process	0.38043	1	1	439	28	25884
GO:0007304	chorion-containing eggshell formation	biological_process	0.38043	1	1	439	28	25884
GO:0030703	eggshell formation	biological_process	0.38043	1	1	439	28	25884
GO:0030707	ovarian follicle cell development	biological_process	0.38043	1	1	439	28	25884
GO:0030855	epithelial cell differentiation	biological_process	0.38043	1	1	439	28	25884
GO:0048477	oogenesis	biological_process	0.38043	1	1	439	28	25884
GO:0019954	asexual reproduction	biological_process	0.38134	1	3	439	131	25884
GO:0045502	dynein binding	molecular_function	0.38173	1	2	439	77	25884
GO:0005262	calcium channel activity	molecular_function	0.38256	1	1	439	30	25884
GO:0046474	glycerophospholipid biosynthetic process	biological_process	0.38284	1	2	439	76	25884
GO:0016043	cellular component organization	biological_process	0.38362	1	34	439	1871	25884
GO:0008757	S-adenosylmethionine-dependent methyltransferase activity	molecular_function	0.38476	1	4	439	181	25884
GO:0022613	ribonucleoprotein complex biogenesis	biological_process	0.38543	1	4	439	187	25884
GO:0005057	receptor signaling protein activity	molecular_function	0.38635	1	2	439	76	25884
GO:0004519	endonuclease activity	molecular_function	0.38639	1	5	439	239	25884
GO:0004536	deoxyribonuclease activity	molecular_function	0.38687	1	3	439	129	25884
GO:0016769	transferase activity, transferring nitrogenous groups	molecular_function	0.3869	1	1	439	28	25884
GO:0015074	DNA integration	biological_process	0.38926	1	3	439	128	25884
GO:0009967	positive regulation of signal transduction	biological_process	0.38953	1	1	439	28	25884
GO:0010647	positive regulation of cell communication	biological_process	0.38953	1	1	439	28	25884
GO:0023056	positive regulation of signaling	biological_process	0.38953	1	1	439	28	25884
GO:0003909	DNA ligase activity	molecular_function	0.38971	1	1	439	28	25884
GO:0005179	hormone activity	molecular_function	0.39017	1	3	439	129	25884
GO:0030259	lipid glycosylation	biological_process	0.3937	1	1	439	28	25884
GO:0015085	calcium ion transmembrane transporter activity	molecular_function	0.39383	1	1	439	31	25884
GO:0005088	Ras guanyl-nucleotide exchange factor activity	molecular_function	0.39474	1	1	439	28	25884
GO:0005089	Rho guanyl-nucleotide exchange factor activity	molecular_function	0.39474	1	1	439	28	25884
GO:0016627	oxidoreductase activity, acting on the CH-CH group of donors	molecular_function	0.39519	1	4	439	183	25884
GO:0008514	organic anion transmembrane transporter activity	molecular_function	0.39727	1	2	439	78	25884
GO:0016706	oxidoreductase activity, acting on paired donors, with incorporation or reduction of molecular oxygen, 2-oxoglutarate as one donor, and incorporation of one atom each of oxygen into both donors	molecular_function	0.39758	1	1	439	30	25884
GO:0032774	RNA biosynthetic process	biological_process	0.40135	1	49	439	2762	25884
GO:0031224	intrinsic component of membrane	cellular_component	0.40246	1	54	439	3026	25884
GO:0022857	transmembrane transporter activity	molecular_function	0.40519	1	30	439	1644	25884
GO:0051539	4 iron, 4 sulfur cluster binding	molecular_function	0.40561	1	1	439	29	25884
GO:0034655	nucleobase-containing compound catabolic process	biological_process	0.40657	1	2	439	80	25884
GO:0005215	transporter activity	molecular_function	0.40668	1	36	439	1990	25884
GO:0045735	nutrient reservoir activity	molecular_function	0.4078	1	2	439	91	25884
GO:0019773	proteasome core complex, alpha-subunit complex	cellular_component	0.40798	1	1	439	32	25884
GO:0003918	DNA topoisomerase type II (ATP-hydrolyzing) activity	molecular_function	0.40817	1	1	439	29	25884
GO:0061505	DNA topoisomerase II activity	molecular_function	0.40817	1	1	439	29	25884
GO:0015932	nucleobase-containing compound transmembrane transporter activity	molecular_function	0.40875	1	1	439	30	25884
GO:0071103	DNA conformation change	biological_process	0.40913	1	3	439	135	25884
GO:0005578	proteinaceous extracellular matrix	cellular_component	0.41007	1	3	439	142	25884
GO:0000956	nuclear-transcribed mRNA catabolic process	biological_process	0.41027	1	1	439	30	25884
GO:0031023	microtubule organizing center organization	biological_process	0.41041	1	1	439	30	25884
GO:0008121	ubiquinol-cytochrome-c reductase activity	molecular_function	0.41081	1	1	439	32	25884
GO:0016681	oxidoreductase activity, acting on diphenols and related substances as donors, cytochrome as acceptor	molecular_function	0.41081	1	1	439	32	25884
GO:0071973	bacterial-type flagellum-dependent cell motility	biological_process	0.41083	1	1	439	32	25884
GO:0006351	transcription, DNA-templated	biological_process	0.41432	1	48	439	2718	25884
GO:0097659	nucleic acid-templated transcription	biological_process	0.41432	1	48	439	2718	25884
GO:0051607	defense response to virus	biological_process	0.41647	1	1	439	31	25884
GO:0006777	Mo-molybdopterin cofactor biosynthetic process	biological_process	0.41755	1	1	439	31	25884
GO:0019720	Mo-molybdopterin cofactor metabolic process	biological_process	0.41755	1	1	439	31	25884
GO:0044743	intracellular protein transmembrane import	biological_process	0.4178	1	1	439	31	25884
GO:0065002	intracellular protein transmembrane transport	biological_process	0.4178	1	1	439	31	25884
GO:0005992	trehalose biosynthetic process	biological_process	0.41881	1	1	439	30	25884
GO:0019058	viral life cycle	biological_process	0.41984	1	6	439	297	25884
GO:0005576	extracellular region	cellular_component	0.42017	1	17	439	944	25884
GO:0009636	response to toxic substance	biological_process	0.42018	1	1	439	31	25884
GO:0030031	cell projection assembly	biological_process	0.42219	1	1	439	31	25884
GO:0040007	growth	biological_process	0.4231	1	1	439	31	25884
GO:0002252	immune effector process	biological_process	0.42354	1	1	439	32	25884
GO:0055085	transmembrane transport	biological_process	0.42419	1	25	439	1358	25884
GO:0016021	integral component of membrane	cellular_component	0.42508	1	53	439	2992	25884
GO:0032504	multicellular organism reproduction	biological_process	0.4256	1	2	439	84	25884
GO:0044766	multi-organism transport	biological_process	0.42824	1	1	439	34	25884
GO:0046794	transport of virus	biological_process	0.42824	1	1	439	34	25884
GO:1902579	multi-organism localization	biological_process	0.42824	1	1	439	34	25884
GO:0048869	cellular developmental process	biological_process	0.4289	1	4	439	193	25884
GO:0070085	glycosylation	biological_process	0.43008	1	3	439	136	25884
GO:0051338	regulation of transferase activity	biological_process	0.43048	1	1	439	33	25884
GO:0051336	regulation of hydrolase activity	biological_process	0.43094	1	1	439	36	25884
GO:0015696	ammonium transport	biological_process	0.43381	1	1	439	32	25884
GO:0000902	cell morphogenesis	biological_process	0.43384	1	2	439	83	25884
GO:0032989	cellular component morphogenesis	biological_process	0.43384	1	2	439	83	25884
GO:0005874	microtubule	cellular_component	0.43616	1	1	439	35	25884
GO:0005876	spindle microtubule	cellular_component	0.43616	1	1	439	35	25884
GO:0032990	cell part morphogenesis	biological_process	0.43772	1	1	439	33	25884
GO:0048858	cell projection morphogenesis	biological_process	0.43772	1	1	439	33	25884
GO:0046351	disaccharide biosynthetic process	biological_process	0.43967	1	1	439	32	25884
GO:0006072	glycerol-3-phosphate metabolic process	biological_process	0.44177	1	1	439	33	25884
GO:0046168	glycerol-3-phosphate catabolic process	biological_process	0.44177	1	1	439	33	25884
GO:0007610	behavior	biological_process	0.44233	1	1	439	34	25884
GO:0009307	DNA restriction-modification system	biological_process	0.44297	1	1	439	33	25884
GO:0044355	clearance of foreign intracellular DNA	biological_process	0.44297	1	1	439	33	25884
GO:0008519	ammonium transmembrane transporter activity	molecular_function	0.44413	1	1	439	33	25884
GO:0009036	Type II site-specific deoxyribonuclease activity	molecular_function	0.44446	1	1	439	33	25884
GO:0015666	restriction endodeoxyribonuclease activity	molecular_function	0.44446	1	1	439	33	25884
GO:0008443	phosphofructokinase activity	molecular_function	0.44453	1	1	439	35	25884
GO:1901505	carbohydrate derivative transporter activity	molecular_function	0.44468	1	1	439	35	25884
GO:0010604	positive regulation of macromolecule metabolic process	biological_process	0.44515	1	2	439	87	25884
GO:0006796	phosphate-containing compound metabolic process	biological_process	0.44725	1	46	439	2542	25884
GO:0004518	nuclease activity	molecular_function	0.44779	1	8	439	427	25884
GO:0009396	folic acid-containing compound biosynthetic process	biological_process	0.44847	1	1	439	34	25884
GO:0006323	DNA packaging	biological_process	0.44919	1	2	439	89	25884
GO:0045017	glycerolipid biosynthetic process	biological_process	0.45006	1	2	439	87	25884
GO:0006793	phosphorus metabolic process	biological_process	0.45157	1	46	439	2546	25884
GO:0008170	N-methyltransferase activity	molecular_function	0.45159	1	2	439	87	25884
GO:0000049	tRNA binding	molecular_function	0.4525	1	1	439	34	25884
GO:0030976	thiamine pyrophosphate binding	molecular_function	0.45252	1	1	439	34	25884
GO:0006040	amino sugar metabolic process	biological_process	0.45362	1	1	439	36	25884
GO:0019200	carbohydrate kinase activity	molecular_function	0.45466	1	1	439	36	25884
GO:0004673	protein histidine kinase activity	molecular_function	0.45646	1	2	439	88	25884
GO:0016775	phosphotransferase activity, nitrogenous group as acceptor	molecular_function	0.45646	1	2	439	88	25884
GO:0001539	cilium or flagellum-dependent cell motility	biological_process	0.45677	1	1	439	37	25884
GO:0097588	archaeal or bacterial-type flagellum-dependent cell motility	biological_process	0.45677	1	1	439	37	25884
GO:0007049	cell cycle	biological_process	0.45696	1	10	439	553	25884
GO:0009966	regulation of signal transduction	biological_process	0.45728	1	2	439	88	25884
GO:0010033	response to organic substance	biological_process	0.4583	1	3	439	156	25884
GO:0034357	photosynthetic membrane	cellular_component	0.45936	1	4	439	220	25884
GO:0005543	phospholipid binding	molecular_function	0.45938	1	2	439	89	25884
GO:0007283	spermatogenesis	biological_process	0.46157	1	1	439	35	25884
GO:0048232	male gamete generation	biological_process	0.46157	1	1	439	35	25884
GO:0019538	protein metabolic process	biological_process	0.46303	1	80	439	4603	25884
GO:0043412	macromolecule modification	biological_process	0.46583	1	50	439	2781	25884
GO:0001932	regulation of protein phosphorylation	biological_process	0.46696	1	1	439	37	25884
GO:0009987	cellular process	biological_process	0.467	1	232	439	13526	25884
GO:0045786	negative regulation of cell cycle	biological_process	0.46766	1	1	439	37	25884
GO:0006626	protein targeting to mitochondrion	biological_process	0.46903	1	1	439	37	25884
GO:0015743	malate transport	biological_process	0.46975	1	1	439	36	25884
GO:0042802	identical protein binding	molecular_function	0.47212	1	3	439	147	25884
GO:0032270	positive regulation of cellular protein metabolic process	biological_process	0.47288	1	1	439	38	25884
GO:0051247	positive regulation of protein metabolic process	biological_process	0.47288	1	1	439	38	25884
GO:0042600	chorion	cellular_component	0.47355	1	1	439	38	25884
GO:0006284	base-excision repair	biological_process	0.47364	1	1	439	36	25884
GO:0007281	germ cell development	biological_process	0.47376	1	1	439	38	25884
GO:0042325	regulation of phosphorylation	biological_process	0.47397	1	1	439	38	25884
GO:0019083	viral transcription	biological_process	0.47589	1	1	439	37	25884
GO:0022414	reproductive process	biological_process	0.47741	1	5	439	259	25884
GO:0007015	actin filament organization	biological_process	0.47745	1	1	439	38	25884
GO:0016879	ligase activity, forming carbon-nitrogen bonds	molecular_function	0.48034	1	2	439	92	25884
GO:0006865	amino acid transport	biological_process	0.4814	1	2	439	92	25884
GO:0010646	regulation of cell communication	biological_process	0.48628	1	2	439	93	25884
GO:0032324	molybdopterin cofactor biosynthetic process	biological_process	0.48631	1	1	439	38	25884
GO:0043545	molybdopterin cofactor metabolic process	biological_process	0.48631	1	1	439	38	25884
GO:0005991	trehalose metabolic process	biological_process	0.48787	1	1	439	37	25884
GO:0044248	cellular catabolic process	biological_process	0.48885	1	12	439	684	25884
GO:0006575	cellular modified amino acid metabolic process	biological_process	0.48926	1	2	439	95	25884
GO:0052646	alditol phosphate metabolic process	biological_process	0.49057	1	1	439	38	25884
GO:0042440	pigment metabolic process	biological_process	0.49125	1	4	439	207	25884
GO:0023051	regulation of signaling	biological_process	0.49213	1	2	439	94	25884
GO:0006952	defense response	biological_process	0.4935	1	6	439	343	25884
GO:0004497	monooxygenase activity	molecular_function	0.49439	1	2	439	93	25884
GO:0006260	DNA replication	biological_process	0.49442	1	9	439	502	25884
GO:0005742	mitochondrial outer membrane translocase complex	cellular_component	0.49454	1	1	439	40	25884
GO:0016209	antioxidant activity	molecular_function	0.49539	1	4	439	220	25884
GO:0043934	sporulation	biological_process	0.49577	1	1	439	39	25884
GO:1902531	regulation of intracellular signal transduction	biological_process	0.4965	1	1	439	38	25884
GO:0000786	nucleosome	cellular_component	0.49668	1	1	439	40	25884
GO:0071806	protein transmembrane transport	biological_process	0.49871	1	1	439	40	25884
GO:0004499	N,N-dimethylaniline monooxygenase activity	molecular_function	0.5022	1	1	439	39	25884
GO:0051189	prosthetic group metabolic process	biological_process	0.50297	1	1	439	40	25884
GO:0000774	adenyl-nucleotide exchange factor activity	molecular_function	0.50431	1	1	439	40	25884
GO:0015740	C4-dicarboxylate transport	biological_process	0.50506	1	1	439	40	25884
GO:0055082	cellular chemical homeostasis	biological_process	0.50592	1	1	439	43	25884
GO:0019748	secondary metabolic process	biological_process	0.50697	1	1	439	40	25884
GO:0016567	protein ubiquitination	biological_process	0.50771	1	3	439	152	25884
GO:0007005	mitochondrion organization	biological_process	0.5083	1	2	439	102	25884
GO:0006334	nucleosome assembly	biological_process	0.50849	1	1	439	42	25884
GO:0031497	chromatin assembly	biological_process	0.50849	1	1	439	42	25884
GO:0034728	nucleosome organization	biological_process	0.50849	1	1	439	42	25884
GO:0003684	damaged DNA binding	molecular_function	0.50935	1	1	439	40	25884
GO:0006760	folic acid-containing compound metabolic process	biological_process	0.51041	1	1	439	41	25884
GO:0070585	protein localization to mitochondrion	biological_process	0.51067	1	1	439	42	25884
GO:0072655	establishment of protein localization to mitochondrion	biological_process	0.51067	1	1	439	42	25884
GO:0016762	xyloglucan:xyloglucosyl transferase activity	molecular_function	0.5111	1	1	439	44	25884
GO:0048046	apoplast	cellular_component	0.5111	1	1	439	44	25884
GO:0008146	sulfotransferase activity	molecular_function	0.51176	1	1	439	42	25884
GO:0031300	intrinsic component of organelle membrane	cellular_component	0.51394	1	2	439	99	25884
GO:0031301	integral component of organelle membrane	cellular_component	0.51394	1	2	439	99	25884
GO:0003697	single-stranded DNA binding	molecular_function	0.51417	1	1	439	43	25884
GO:0016740	transferase activity	molecular_function	0.51515	1	95	439	5433	25884
GO:0015698	inorganic anion transport	biological_process	0.5153	1	2	439	102	25884
GO:0009893	positive regulation of metabolic process	biological_process	0.51695	1	3	439	160	25884
GO:0045892	negative regulation of transcription, DNA-templated	biological_process	0.51714	1	1	439	42	25884
GO:0051253	negative regulation of RNA metabolic process	biological_process	0.51714	1	1	439	42	25884
GO:1902679	negative regulation of RNA biosynthetic process	biological_process	0.51714	1	1	439	42	25884
GO:1903507	negative regulation of nucleic acid-templated transcription	biological_process	0.51714	1	1	439	42	25884
GO:0032879	regulation of localization	biological_process	0.51975	1	1	439	41	25884
GO:0032993	protein-DNA complex	cellular_component	0.52019	1	1	439	43	25884
GO:0016893	endonuclease activity, active with either ribo- or deoxyribonucleic acids and producing 5'-phosphomonoesters	molecular_function	0.5234	1	3	439	159	25884
GO:0044815	DNA packaging complex	cellular_component	0.52374	1	1	439	43	25884
GO:0019438	aromatic compound biosynthetic process	biological_process	0.52411	1	56	439	3290	25884
GO:0032446	protein modification by small protein conjugation	biological_process	0.52413	1	3	439	156	25884
GO:0031683	G-protein beta/gamma-subunit complex binding	molecular_function	0.52439	1	2	439	103	25884
GO:0042559	pteridine-containing compound biosynthetic process	biological_process	0.52455	1	1	439	43	25884
GO:0046434	organophosphate catabolic process	biological_process	0.52461	1	1	439	42	25884
GO:0050790	regulation of catalytic activity	biological_process	0.5304	1	2	439	107	25884
GO:0009288	bacterial-type flagellum	cellular_component	0.5307	1	1	439	45	25884
GO:0016791	phosphatase activity	molecular_function	0.53081	1	5	439	277	25884
GO:0034654	nucleobase-containing compound biosynthetic process	biological_process	0.53362	1	51	439	3010	25884
GO:0008168	methyltransferase activity	molecular_function	0.53394	1	10	439	577	25884
GO:0005839	proteasome core complex	cellular_component	0.53425	1	1	439	47	25884
GO:0019013	viral nucleocapsid	cellular_component	0.53692	1	1	439	45	25884
GO:0019031	viral envelope	cellular_component	0.53752	1	4	439	224	25884
GO:0036338	viral membrane	cellular_component	0.53752	1	4	439	224	25884
GO:0009991	response to extracellular stimulus	biological_process	0.5378	1	1	439	47	25884
GO:0031668	cellular response to extracellular stimulus	biological_process	0.5378	1	1	439	47	25884
GO:0071496	cellular response to external stimulus	biological_process	0.5378	1	1	439	47	25884
GO:0043093	FtsZ-dependent cytokinesis	biological_process	0.54031	1	2	439	107	25884
GO:0098799	outer mitochondrial membrane protein complex	cellular_component	0.54092	1	1	439	46	25884
GO:0033014	tetrapyrrole biosynthetic process	biological_process	0.54109	1	3	439	164	25884
GO:0022412	cellular process involved in reproduction in multicellular organism	biological_process	0.54298	1	1	439	46	25884
GO:0044249	cellular biosynthetic process	biological_process	0.54417	1	89	439	5305	25884
GO:0003677	DNA binding	molecular_function	0.5442	1	50	439	2964	25884
GO:0008608	attachment of spindle microtubules to kinetochore	biological_process	0.54628	1	1	439	46	25884
GO:0006022	aminoglycan metabolic process	biological_process	0.54747	1	1	439	47	25884
GO:0035556	intracellular signal transduction	biological_process	0.54758	1	9	439	533	25884
GO:0006333	chromatin assembly or disassembly	biological_process	0.54935	1	1	439	47	25884
GO:1901575	organic substance catabolic process	biological_process	0.55157	1	11	439	644	25884
GO:0006839	mitochondrial transport	biological_process	0.55191	1	1	439	48	25884
GO:0018193	peptidyl-amino acid modification	biological_process	0.55225	1	2	439	109	25884
GO:0019012	virion	cellular_component	0.55235	1	9	439	528	25884
GO:0019684	photosynthesis, light reaction	biological_process	0.5524	1	1	439	49	25884
GO:0016773	phosphotransferase activity, alcohol group as acceptor	molecular_function	0.55249	1	38	439	2161	25884
GO:0034660	ncRNA metabolic process	biological_process	0.55414	1	11	439	637	25884
GO:0006265	DNA topological change	biological_process	0.55426	1	1	439	46	25884
GO:0019220	regulation of phosphate metabolic process	biological_process	0.55627	1	1	439	48	25884
GO:0051174	regulation of phosphorus metabolic process	biological_process	0.55627	1	1	439	48	25884
GO:0007010	cytoskeleton organization	biological_process	0.55652	1	7	439	406	25884
GO:0006486	protein glycosylation	biological_process	0.55838	1	2	439	106	25884
GO:0043413	macromolecule glycosylation	biological_process	0.55838	1	2	439	106	25884
GO:0016888	endodeoxyribonuclease activity, producing 5'-phosphomonoesters	molecular_function	0.55993	1	1	439	46	25884
GO:0004540	ribonuclease activity	molecular_function	0.56066	1	3	439	171	25884
GO:0042803	protein homodimerization activity	molecular_function	0.56152	1	2	439	109	25884
GO:0038023	signaling receptor activity	molecular_function	0.56338	1	5	439	285	25884
GO:0006289	nucleotide-excision repair	biological_process	0.56408	1	1	439	47	25884
GO:0034453	microtubule anchoring	biological_process	0.56527	1	1	439	49	25884
GO:0000785	chromatin	cellular_component	0.56612	1	1	439	49	25884
GO:0008033	tRNA processing	biological_process	0.56687	1	7	439	408	25884
GO:0009615	response to virus	biological_process	0.57334	1	1	439	50	25884
GO:0005198	structural molecule activity	molecular_function	0.57476	1	15	439	982	25884
GO:0000281	mitotic cytokinesis	biological_process	0.5753	1	2	439	114	25884
GO:0000917	barrier septum assembly	biological_process	0.5753	1	2	439	114	25884
GO:0032506	cytokinetic process	biological_process	0.5753	1	2	439	114	25884
GO:0061640	cytoskeleton-dependent cytokinesis	biological_process	0.5753	1	2	439	114	25884
GO:0090529	cell septum assembly	biological_process	0.5753	1	2	439	114	25884
GO:1902410	mitotic cytokinetic process	biological_process	0.5753	1	2	439	114	25884
GO:0008083	growth factor activity	molecular_function	0.57723	1	1	439	54	25884
GO:0004871	signal transducer activity	molecular_function	0.57922	1	8	439	480	25884
GO:0045934	negative regulation of nucleobase-containing compound metabolic process	biological_process	0.57956	1	1	439	50	25884
GO:0016782	transferase activity, transferring sulfur-containing groups	molecular_function	0.58166	1	1	439	51	25884
GO:0016891	endoribonuclease activity, producing 5'-phosphomonoesters	molecular_function	0.58268	1	2	439	113	25884
GO:0042578	phosphoric ester hydrolase activity	molecular_function	0.58269	1	6	439	354	25884
GO:0005882	intermediate filament	cellular_component	0.58272	1	1	439	49	25884
GO:0045111	intermediate filament cytoskeleton	cellular_component	0.58272	1	1	439	49	25884
GO:0016741	transferase activity, transferring one-carbon groups	molecular_function	0.58415	1	10	439	600	25884
GO:0042558	pteridine-containing compound metabolic process	biological_process	0.5852	1	1	439	51	25884
GO:0048518	positive regulation of biological process	biological_process	0.58722	1	4	439	239	25884
GO:0006721	terpenoid metabolic process	biological_process	0.58911	1	2	439	110	25884
GO:0016114	terpenoid biosynthetic process	biological_process	0.58911	1	2	439	110	25884
GO:0046914	transition metal ion binding	molecular_function	0.59106	1	41	439	2438	25884
GO:0045893	positive regulation of transcription, DNA-templated	biological_process	0.59189	1	1	439	50	25884
GO:0045935	positive regulation of nucleobase-containing compound metabolic process	biological_process	0.59189	1	1	439	50	25884
GO:0051254	positive regulation of RNA metabolic process	biological_process	0.59189	1	1	439	50	25884
GO:1902680	positive regulation of RNA biosynthetic process	biological_process	0.59189	1	1	439	50	25884
GO:1903508	positive regulation of nucleic acid-templated transcription	biological_process	0.59189	1	1	439	50	25884
GO:0003916	DNA topoisomerase activity	molecular_function	0.59383	1	1	439	51	25884
GO:0033176	proton-transporting V-type ATPase complex	cellular_component	0.59778	1	2	439	117	25884
GO:0019842	vitamin binding	molecular_function	0.5998	1	1	439	52	25884
GO:0009890	negative regulation of biosynthetic process	biological_process	0.60015	1	1	439	53	25884
GO:0010558	negative regulation of macromolecule biosynthetic process	biological_process	0.60015	1	1	439	53	25884
GO:0031327	negative regulation of cellular biosynthetic process	biological_process	0.60015	1	1	439	53	25884
GO:0051172	negative regulation of nitrogen compound metabolic process	biological_process	0.60015	1	1	439	53	25884
GO:2000113	negative regulation of cellular macromolecule biosynthetic process	biological_process	0.60015	1	1	439	53	25884
GO:0044421	extracellular region part	cellular_component	0.60062	1	4	439	253	25884
GO:0009101	glycoprotein biosynthetic process	biological_process	0.60246	1	2	439	115	25884
GO:0009072	aromatic amino acid family metabolic process	biological_process	0.60412	1	1	439	53	25884
GO:0005815	microtubule organizing center	cellular_component	0.60493	1	1	439	55	25884
GO:0015979	photosynthesis	biological_process	0.60698	1	4	439	264	25884
GO:0000990	transcription factor activity, core RNA polymerase binding	molecular_function	0.60723	1	1	439	53	25884
GO:0000996	core DNA-dependent RNA polymerase binding promoter specificity activity	molecular_function	0.60723	1	1	439	53	25884
GO:0016987	sigma factor activity	molecular_function	0.60723	1	1	439	53	25884
GO:0016301	kinase activity	molecular_function	0.61015	1	39	439	2270	25884
GO:0004888	transmembrane signaling receptor activity	molecular_function	0.61057	1	3	439	179	25884
GO:0005381	iron ion transmembrane transporter activity	molecular_function	0.61102	1	2	439	119	25884
GO:0065009	regulation of molecular function	biological_process	0.61171	1	2	439	123	25884
GO:0005741	mitochondrial outer membrane	cellular_component	0.61246	1	2	439	124	25884
GO:0031968	organelle outer membrane	cellular_component	0.61246	1	2	439	124	25884
GO:0048878	chemical homeostasis	biological_process	0.61313	1	1	439	57	25884
GO:0044703	multi-organism reproductive process	biological_process	0.61825	1	4	439	242	25884
GO:0017038	protein import	biological_process	0.61996	1	2	439	121	25884
GO:0009100	glycoprotein metabolic process	biological_process	0.62022	1	2	439	119	25884
GO:0033365	protein localization to organelle	biological_process	0.62069	1	4	439	248	25884
GO:0009579	thylakoid	cellular_component	0.62241	1	4	439	269	25884
GO:0044436	thylakoid part	cellular_component	0.62241	1	4	439	269	25884
GO:0004872	receptor activity	molecular_function	0.62328	1	5	439	307	25884
GO:0009891	positive regulation of biosynthetic process	biological_process	0.62342	1	1	439	55	25884
GO:0010557	positive regulation of macromolecule biosynthetic process	biological_process	0.62342	1	1	439	55	25884
GO:0010628	positive regulation of gene expression	biological_process	0.62342	1	1	439	55	25884
GO:0031328	positive regulation of cellular biosynthetic process	biological_process	0.62342	1	1	439	55	25884
GO:0051173	positive regulation of nitrogen compound metabolic process	biological_process	0.62342	1	1	439	55	25884
GO:0016070	RNA metabolic process	biological_process	0.62512	1	61	439	3678	25884
GO:0060089	molecular transducer activity	molecular_function	0.62624	1	8	439	502	25884
GO:0009059	macromolecule biosynthetic process	biological_process	0.6271	1	69	439	4235	25884
GO:0034645	cellular macromolecule biosynthetic process	biological_process	0.62787	1	68	439	4177	25884
GO:0018130	heterocycle biosynthetic process	biological_process	0.6285	1	55	439	3341	25884
GO:0052126	movement in host environment	biological_process	0.63575	1	1	439	59	25884
GO:0052192	movement in environment of other organism involved in symbiotic interaction	biological_process	0.63575	1	1	439	59	25884
GO:0030001	metal ion transport	biological_process	0.63658	1	10	439	640	25884
GO:0001871	pattern binding	molecular_function	0.63682	1	2	439	122	25884
GO:0030247	polysaccharide binding	molecular_function	0.63682	1	2	439	122	25884
GO:0007186	G-protein coupled receptor signaling pathway	biological_process	0.63786	1	4	439	258	25884
GO:0016032	viral process	biological_process	0.63802	1	8	439	499	25884
GO:0031399	regulation of protein modification process	biological_process	0.64027	1	1	439	60	25884
GO:0048519	negative regulation of biological process	biological_process	0.64041	1	3	439	192	25884
GO:0098805	whole membrane	cellular_component	0.64142	1	5	439	316	25884
GO:0050896	response to stimulus	biological_process	0.6416	1	48	439	2969	25884
GO:0019080	viral gene expression	biological_process	0.64171	1	1	439	58	25884
GO:1901135	carbohydrate derivative metabolic process	biological_process	0.64255	1	13	439	818	25884
GO:0070925	organelle assembly	biological_process	0.64277	1	2	439	130	25884
GO:0016709	oxidoreductase activity, acting on paired donors, with incorporation or reduction of molecular oxygen, NAD(P)H as one donor, and incorporation of one atom of oxygen	molecular_function	0.64582	1	1	439	58	25884
GO:0048285	organelle fission	biological_process	0.64732	1	2	439	130	25884
GO:0000502	proteasome complex	cellular_component	0.64797	1	1	439	63	25884
GO:1901607	alpha-amino acid biosynthetic process	biological_process	0.64974	1	3	439	190	25884
GO:0006402	mRNA catabolic process	biological_process	0.65148	1	1	439	60	25884
GO:0004521	endoribonuclease activity	molecular_function	0.65159	1	2	439	130	25884
GO:0061025	membrane fusion	biological_process	0.6525	1	1	439	61	25884
GO:0072528	pyrimidine-containing compound biosynthetic process	biological_process	0.6559	1	1	439	63	25884
GO:0015171	amino acid transmembrane transporter activity	molecular_function	0.65806	1	1	439	61	25884
GO:0009108	coenzyme biosynthetic process	biological_process	0.65881	1	3	439	195	25884
GO:0006304	DNA modification	biological_process	0.65897	1	1	439	61	25884
GO:0030154	cell differentiation	biological_process	0.65972	1	2	439	132	25884
GO:0009056	catabolic process	biological_process	0.6599	1	14	439	892	25884
GO:0050794	regulation of cellular process	biological_process	0.66075	1	68	439	4160	25884
GO:0019354	siroheme biosynthetic process	biological_process	0.66093	1	1	439	60	25884
GO:0043115	precorrin-2 dehydrogenase activity	molecular_function	0.66093	1	1	439	60	25884
GO:0046156	siroheme metabolic process	biological_process	0.66093	1	1	439	60	25884
GO:0010629	negative regulation of gene expression	biological_process	0.66404	1	1	439	62	25884
GO:0048468	cell development	biological_process	0.66426	1	1	439	64	25884
GO:0016702	oxidoreductase activity, acting on single donors with incorporation of molecular oxygen, incorporation of two atoms of oxygen	molecular_function	0.66504	1	1	439	64	25884
GO:0030030	cell projection organization	biological_process	0.66505	1	1	439	63	25884
GO:0050789	regulation of biological process	biological_process	0.66593	1	71	439	4347	25884
GO:0032502	developmental process	biological_process	0.66861	1	7	439	459	25884
GO:0006401	RNA catabolic process	biological_process	0.66934	1	1	439	63	25884
GO:0008094	DNA-dependent ATPase activity	molecular_function	0.6697	1	1	439	62	25884
GO:0051087	chaperone binding	molecular_function	0.67014	1	1	439	64	25884
GO:1901681	sulfur compound binding	molecular_function	0.67018	1	1	439	63	25884
GO:0008081	phosphoric diester hydrolase activity	molecular_function	0.67144	1	1	439	64	25884
GO:0022607	cellular component assembly	biological_process	0.67145	1	10	439	655	25884
GO:0019028	viral capsid	cellular_component	0.67216	1	4	439	268	25884
GO:0008408	3'-5' exonuclease activity	molecular_function	0.67342	1	1	439	65	25884
GO:0000226	microtubule cytoskeleton organization	biological_process	0.67485	1	2	439	136	25884
GO:0060590	ATPase regulator activity	molecular_function	0.675	1	1	439	67	25884
GO:0016311	dephosphorylation	biological_process	0.6796	1	1	439	65	25884
GO:0000778	condensed nuclear chromosome kinetochore	cellular_component	0.68195	1	1	439	66	25884
GO:0000780	condensed nuclear chromosome, centromeric region	cellular_component	0.68195	1	1	439	66	25884
GO:0000942	condensed nuclear chromosome outer kinetochore	cellular_component	0.68195	1	1	439	66	25884
GO:0042729	DASH complex	cellular_component	0.68195	1	1	439	66	25884
GO:0044802	single-organism membrane organization	biological_process	0.68236	1	3	439	205	25884
GO:0008289	lipid binding	molecular_function	0.68262	1	4	439	269	25884
GO:0015988	energy coupled proton transmembrane transport, against electrochemical gradient	biological_process	0.68729	1	2	439	140	25884
GO:0015991	ATP hydrolysis coupled proton transport	biological_process	0.68729	1	2	439	140	25884
GO:0004529	exodeoxyribonuclease activity	molecular_function	0.68764	1	1	439	67	25884
GO:0008855	exodeoxyribonuclease VII activity	molecular_function	0.68764	1	1	439	67	25884
GO:0016895	exodeoxyribonuclease activity, producing 5'-phosphomonoesters	molecular_function	0.68764	1	1	439	67	25884
GO:0031325	positive regulation of cellular metabolic process	biological_process	0.68957	1	2	439	139	25884
GO:0004175	endopeptidase activity	molecular_function	0.69113	1	11	439	714	25884
GO:1901137	carbohydrate derivative biosynthetic process	biological_process	0.69666	1	7	439	470	25884
GO:0046983	protein dimerization activity	molecular_function	0.69835	1	8	439	544	25884
GO:0044033	multi-organism metabolic process	biological_process	0.70099	1	1	439	68	25884
GO:0048523	negative regulation of cellular process	biological_process	0.70217	1	2	439	142	25884
GO:0000910	cytokinesis	biological_process	0.70728	1	2	439	145	25884
GO:0004527	exonuclease activity	molecular_function	0.70783	1	2	439	143	25884
GO:0043170	macromolecule metabolic process	biological_process	0.70791	1	145	439	8759	25884
GO:0019725	cellular homeostasis	biological_process	0.70808	1	3	439	231	25884
GO:0006338	chromatin remodeling	biological_process	0.70823	1	2	439	144	25884
GO:0003924	GTPase activity	molecular_function	0.70934	1	8	439	532	25884
GO:0031324	negative regulation of cellular metabolic process	biological_process	0.70988	1	1	439	72	25884
GO:0006783	heme biosynthetic process	biological_process	0.71108	1	1	439	69	25884
GO:0044272	sulfur compound biosynthetic process	biological_process	0.7118	1	1	439	71	25884
GO:0000228	nuclear chromosome	cellular_component	0.71231	1	2	439	146	25884
GO:0008374	O-acyltransferase activity	molecular_function	0.71261	1	1	439	71	25884
GO:1901360	organic cyclic compound metabolic process	biological_process	0.71299	1	92	439	5634	25884
GO:0046915	transition metal ion transmembrane transporter activity	molecular_function	0.71513	1	2	439	146	25884
GO:0044237	cellular metabolic process	biological_process	0.71739	1	166	439	10050	25884
GO:0070647	protein modification by small protein conjugation or removal	biological_process	0.71746	1	3	439	208	25884
GO:0044767	single-organism developmental process	biological_process	0.71762	1	6	439	418	25884
GO:0006720	isoprenoid metabolic process	biological_process	0.71839	1	2	439	141	25884
GO:0008299	isoprenoid biosynthetic process	biological_process	0.71839	1	2	439	141	25884
GO:0051082	unfolded protein binding	molecular_function	0.72055	1	2	439	153	25884
GO:0015629	actin cytoskeleton	cellular_component	0.72148	1	1	439	73	25884
GO:0008134	transcription factor binding	molecular_function	0.72173	1	3	439	211	25884
GO:1902589	single-organism organelle organization	biological_process	0.72469	1	7	439	485	25884
GO:0090150	establishment of protein localization to membrane	biological_process	0.7249	1	2	439	148	25884
GO:0003333	amino acid transmembrane transport	biological_process	0.72692	1	1	439	72	25884
GO:1903825	organic acid transmembrane transport	biological_process	0.72692	1	1	439	72	25884
GO:0043566	structure-specific DNA binding	molecular_function	0.72952	1	2	439	150	25884
GO:0072594	establishment of protein localization to organelle	biological_process	0.73146	1	3	439	219	25884
GO:0098656	anion transmembrane transport	biological_process	0.73191	1	1	439	73	25884
GO:0050660	flavin adenine dinucleotide binding	molecular_function	0.73191	1	4	439	279	25884
GO:0072657	protein localization to membrane	biological_process	0.73257	1	2	439	151	25884
GO:0042168	heme metabolic process	biological_process	0.7344	1	1	439	74	25884
GO:0003774	motor activity	molecular_function	0.73642	1	2	439	146	25884
GO:0006270	DNA replication initiation	biological_process	0.73761	1	1	439	77	25884
GO:0044423	virion part	cellular_component	0.73783	1	7	439	490	25884
GO:0070838	divalent metal ion transport	biological_process	0.73825	1	2	439	151	25884
GO:0004252	serine-type endopeptidase activity	molecular_function	0.74319	1	3	439	217	25884
GO:0003779	actin binding	molecular_function	0.7437	1	3	439	223	25884
GO:0022402	cell cycle process	biological_process	0.74465	1	5	439	364	25884
GO:0042626	ATPase activity, coupled to transmembrane movement of substances	molecular_function	0.74516	1	2	439	151	25884
GO:0043492	ATPase activity, coupled to movement of substances	molecular_function	0.74516	1	2	439	151	25884
GO:0006606	protein import into nucleus	biological_process	0.74527	1	1	439	79	25884
GO:0034504	protein localization to nucleus	biological_process	0.74527	1	1	439	79	25884
GO:0044744	protein targeting to nucleus	biological_process	0.74527	1	1	439	79	25884
GO:0051170	nuclear import	biological_process	0.74527	1	1	439	79	25884
GO:1902593	single-organism nuclear import	biological_process	0.74527	1	1	439	79	25884
GO:0008652	cellular amino acid biosynthetic process	biological_process	0.74691	1	3	439	221	25884
GO:0019318	hexose metabolic process	biological_process	0.74748	1	1	439	81	25884
GO:0015672	monovalent inorganic cation transport	biological_process	0.75334	1	8	439	564	25884
GO:0072511	divalent inorganic cation transport	biological_process	0.75388	1	2	439	156	25884
GO:0004930	G-protein coupled receptor activity	molecular_function	0.75399	1	1	439	80	25884
GO:0004866	endopeptidase inhibitor activity	molecular_function	0.75756	1	1	439	98	25884
GO:0061135	endopeptidase regulator activity	molecular_function	0.75756	1	1	439	98	25884
GO:0005102	receptor binding	molecular_function	0.75824	1	5	439	372	25884
GO:0033177	proton-transporting two-sector ATPase complex, proton-transporting domain	cellular_component	0.76138	1	2	439	167	25884
GO:0016874	ligase activity	molecular_function	0.76298	1	4	439	294	25884
GO:0051536	iron-sulfur cluster binding	molecular_function	0.76312	1	2	439	162	25884
GO:0051540	metal cluster binding	molecular_function	0.76312	1	2	439	162	25884
GO:0050661	NADP binding	molecular_function	0.76413	1	1	439	81	25884
GO:0044763	single-organism cellular process	biological_process	0.7649	1	112	439	6874	25884
GO:0005840	ribosome	cellular_component	0.76644	1	7	439	590	25884
GO:0072509	divalent inorganic cation transmembrane transporter activity	molecular_function	0.7692	1	2	439	163	25884
GO:0007264	small GTPase mediated signal transduction	biological_process	0.77081	1	3	439	241	25884
GO:0003743	translation initiation factor activity	molecular_function	0.77132	1	1	439	89	25884
GO:0000940	condensed chromosome outer kinetochore	cellular_component	0.77276	1	1	439	87	25884
GO:0016810	hydrolase activity, acting on carbon-nitrogen (but not peptide) bonds	molecular_function	0.77598	1	1	439	86	25884
GO:0000794	condensed nuclear chromosome	cellular_component	0.77667	1	1	439	87	25884
GO:0000777	condensed chromosome kinetochore	cellular_component	0.77688	1	1	439	88	25884
GO:0000779	condensed chromosome, centromeric region	cellular_component	0.77688	1	1	439	88	25884
GO:0016485	protein processing	biological_process	0.78211	1	1	439	89	25884
GO:0051604	protein maturation	biological_process	0.78211	1	1	439	89	25884
GO:0005996	monosaccharide metabolic process	biological_process	0.78361	1	1	439	90	25884
GO:0046873	metal ion transmembrane transporter activity	molecular_function	0.78401	1	6	439	449	25884
GO:0044764	multi-organism cellular process	biological_process	0.78404	1	8	439	576	25884
GO:0061024	membrane organization	biological_process	0.78774	1	3	439	242	25884
GO:0010605	negative regulation of macromolecule metabolic process	biological_process	0.78782	1	1	439	89	25884
GO:0098813	nuclear chromosome segregation	biological_process	0.78944	1	1	439	90	25884
GO:0012507	ER to Golgi transport vesicle membrane	cellular_component	0.7897	1	1	439	87	25884
GO:0030127	COPII vesicle coat	cellular_component	0.7897	1	1	439	87	25884
GO:0030134	ER to Golgi transport vesicle	cellular_component	0.7897	1	1	439	87	25884
GO:0044425	membrane part	cellular_component	0.78977	1	60	439	3831	25884
GO:0030414	peptidase inhibitor activity	molecular_function	0.78999	1	1	439	106	25884
GO:0061134	peptidase regulator activity	molecular_function	0.78999	1	1	439	106	25884
GO:0015630	microtubule cytoskeleton	cellular_component	0.79033	1	2	439	175	25884
GO:0051213	dioxygenase activity	molecular_function	0.79173	1	1	439	92	25884
GO:0006614	SRP-dependent cotranslational protein targeting to membrane	biological_process	0.79221	1	1	439	89	25884
GO:0045047	protein targeting to ER	biological_process	0.79221	1	1	439	89	25884
GO:0072599	establishment of protein localization to endoplasmic reticulum	biological_process	0.79221	1	1	439	89	25884
GO:0016597	amino acid binding	molecular_function	0.79375	1	1	439	90	25884
GO:0045454	cell redox homeostasis	biological_process	0.7956	1	2	439	188	25884
GO:0006914	autophagy	biological_process	0.79574	1	3	439	254	25884
GO:0006325	chromatin organization	biological_process	0.79596	1	3	439	248	25884
GO:0003968	RNA-directed RNA polymerase activity	molecular_function	0.79763	1	1	439	90	25884
GO:0044281	small molecule metabolic process	biological_process	0.79828	1	21	439	1423	25884
GO:0016796	exonuclease activity, active with either ribo- or deoxyribonucleic acids and producing 5'-phosphomonoesters	molecular_function	0.7993	1	1	439	92	25884
GO:0031406	carboxylic acid binding	molecular_function	0.80097	1	1	439	92	25884
GO:0043177	organic acid binding	molecular_function	0.80097	1	1	439	92	25884
GO:0015035	protein disulfide oxidoreductase activity	molecular_function	0.801	1	1	439	104	25884
GO:0015036	disulfide oxidoreductase activity	molecular_function	0.801	1	1	439	104	25884
GO:0042623	ATPase activity, coupled	molecular_function	0.802	1	3	439	242	25884
GO:0009617	response to bacterium	biological_process	0.80427	1	1	439	96	25884
GO:0042742	defense response to bacterium	biological_process	0.80427	1	1	439	96	25884
GO:0003777	microtubule motor activity	molecular_function	0.80617	1	1	439	90	25884
GO:0007017	microtubule-based process	biological_process	0.80731	1	3	439	251	25884
GO:0006605	protein targeting	biological_process	0.80736	1	3	439	251	25884
GO:0015399	primary active transmembrane transporter activity	molecular_function	0.80969	1	2	439	173	25884
GO:0015405	P-P-bond-hydrolysis-driven transmembrane transporter activity	molecular_function	0.80969	1	2	439	173	25884
GO:0071705	nitrogen compound transport	biological_process	0.81164	1	3	439	252	25884
GO:0065007	biological regulation	biological_process	0.81387	1	71	439	4562	25884
GO:0006996	organelle organization	biological_process	0.81663	1	16	439	1132	25884
GO:0006613	cotranslational protein targeting to membrane	biological_process	0.81836	1	1	439	97	25884
GO:0016701	oxidoreductase activity, acting on single donors with incorporation of molecular oxygen	molecular_function	0.81875	1	1	439	98	25884
GO:0006888	ER to Golgi vesicle-mediated transport	biological_process	0.81954	1	1	439	97	25884
GO:0008047	enzyme activator activity	molecular_function	0.81966	1	1	439	97	25884
GO:0044448	cell cortex part	cellular_component	0.8206	1	1	439	96	25884
GO:0006399	tRNA metabolic process	biological_process	0.82097	1	7	439	529	25884
GO:0009892	negative regulation of metabolic process	biological_process	0.8217	1	1	439	101	25884
GO:0007018	microtubule-based movement	biological_process	0.82186	1	1	439	95	25884
GO:0016628	oxidoreductase activity, acting on the CH-CH group of donors, NAD or NADP as acceptor	molecular_function	0.82684	1	1	439	99	25884
GO:0019637	organophosphate metabolic process	biological_process	0.82696	1	10	439	747	25884
GO:1902580	single-organism cellular localization	biological_process	0.82778	1	3	439	261	25884
GO:0006612	protein targeting to membrane	biological_process	0.82814	1	1	439	100	25884
GO:0006811	ion transport	biological_process	0.82815	1	20	439	1410	25884
GO:0006261	DNA-dependent DNA replication	biological_process	0.82868	1	1	439	101	25884
GO:0001076	transcription factor activity, RNA polymerase II transcription factor binding	molecular_function	0.82885	1	1	439	104	25884
GO:0001104	RNA polymerase II transcription cofactor activity	molecular_function	0.82885	1	1	439	104	25884
GO:0070972	protein localization to endoplasmic reticulum	biological_process	0.83028	1	1	439	101	25884
GO:0006913	nucleocytoplasmic transport	biological_process	0.83116	1	1	439	103	25884
GO:0051169	nuclear transport	biological_process	0.83116	1	1	439	103	25884
GO:0005819	spindle	cellular_component	0.83247	1	1	439	104	25884
GO:0000278	mitotic cell cycle	biological_process	0.83608	1	2	439	191	25884
GO:1903047	mitotic cell cycle process	biological_process	0.83608	1	2	439	191	25884
GO:0030246	carbohydrate binding	molecular_function	0.83725	1	3	439	257	25884
GO:0016592	mediator complex	cellular_component	0.83767	1	1	439	107	25884
GO:0044267	cellular protein metabolic process	biological_process	0.83767	1	58	439	3794	25884
GO:0016482	cytoplasmic transport	biological_process	0.84243	1	4	439	340	25884
GO:0005615	extracellular space	cellular_component	0.84482	1	1	439	111	25884
GO:0006396	RNA processing	biological_process	0.84538	1	11	439	820	25884
GO:0044271	cellular nitrogen compound biosynthetic process	biological_process	0.84565	1	63	439	4197	25884
GO:0005887	integral component of plasma membrane	cellular_component	0.84616	1	1	439	108	25884
GO:0016020	membrane	cellular_component	0.84719	1	95	439	6031	25884
GO:0015093	ferrous iron transmembrane transporter activity	molecular_function	0.84722	1	1	439	108	25884
GO:0015684	ferrous iron transport	biological_process	0.84722	1	1	439	108	25884
GO:0005938	cell cortex	cellular_component	0.84746	1	1	439	106	25884
GO:0098588	bounding membrane of organelle	cellular_component	0.84905	1	7	439	560	25884
GO:0042592	homeostatic process	biological_process	0.8501	1	3	439	292	25884
GO:0090407	organophosphate biosynthetic process	biological_process	0.85215	1	5	439	424	25884
GO:0030658	transport vesicle membrane	cellular_component	0.85267	1	1	439	107	25884
GO:0065004	protein-DNA complex assembly	biological_process	0.85336	1	1	439	112	25884
GO:0071824	protein-DNA complex subunit organization	biological_process	0.85336	1	1	439	112	25884
GO:0008380	RNA splicing	biological_process	0.85422	1	1	439	111	25884
GO:0005261	cation channel activity	molecular_function	0.85457	1	1	439	113	25884
GO:1901605	alpha-amino acid metabolic process	biological_process	0.85482	1	3	439	272	25884
GO:0090304	nucleic acid metabolic process	biological_process	0.85493	1	71	439	4605	25884
GO:0031226	intrinsic component of plasma membrane	cellular_component	0.8563	1	1	439	112	25884
GO:0044765	single-organism transport	biological_process	0.85642	1	42	439	2812	25884
GO:0098519	nucleotide phosphatase activity, acting on free nucleotides	molecular_function	0.85683	1	1	439	109	25884
GO:0006357	regulation of transcription from RNA polymerase II promoter	biological_process	0.8576	1	1	439	114	25884
GO:0043167	ion binding	molecular_function	0.85789	1	127	439	7865	25884
GO:0016568	chromatin modification	biological_process	0.85895	1	2	439	200	25884
GO:0000793	condensed chromosome	cellular_component	0.85936	1	1	439	115	25884
GO:0051726	regulation of cell cycle	biological_process	0.85989	1	1	439	117	25884
GO:0044700	single organism signaling	biological_process	0.86084	1	19	439	1387	25884
GO:0016765	transferase activity, transferring alkyl or aryl (other than methyl) groups	molecular_function	0.86101	1	1	439	114	25884
GO:0023052	signaling	biological_process	0.86167	1	19	439	1388	25884
GO:1901363	heterocyclic compound binding	molecular_function	0.86343	1	141	439	8738	25884
GO:0097159	organic cyclic compound binding	molecular_function	0.86372	1	141	439	8739	25884
GO:0030133	transport vesicle	cellular_component	0.86502	1	1	439	113	25884
GO:0048522	positive regulation of cellular process	biological_process	0.86827	1	2	439	205	25884
GO:0006826	iron ion transport	biological_process	0.87011	1	1	439	117	25884
GO:0044454	nuclear chromosome part	cellular_component	0.87075	1	1	439	119	25884
GO:0003735	structural constituent of ribosome	molecular_function	0.87166	1	6	439	594	25884
GO:0010467	gene expression	biological_process	0.87375	1	66	439	4429	25884
GO:0044430	cytoskeletal part	cellular_component	0.87613	1	3	439	292	25884
GO:0030170	pyridoxal phosphate binding	molecular_function	0.87843	1	1	439	119	25884
GO:0015631	tubulin binding	molecular_function	0.87959	1	2	439	210	25884
GO:0005789	endoplasmic reticulum membrane	cellular_component	0.88346	1	2	439	216	25884
GO:0044427	chromosomal part	cellular_component	0.88574	1	3	439	300	25884
GO:1902578	single-organism localization	biological_process	0.88632	1	42	439	2869	25884
GO:0007059	chromosome segregation	biological_process	0.88746	1	1	439	127	25884
GO:0034220	ion transmembrane transport	biological_process	0.88775	1	5	439	452	25884
GO:0005694	chromosome	cellular_component	0.88783	1	4	439	378	25884
GO:0016772	transferase activity, transferring phosphorus-containing groups	molecular_function	0.88981	1	44	439	2930	25884
GO:0006732	coenzyme metabolic process	biological_process	0.89101	1	3	439	298	25884
GO:0030120	vesicle coat	cellular_component	0.89132	1	1	439	124	25884
GO:0030135	coated vesicle	cellular_component	0.89132	1	1	439	124	25884
GO:0030659	cytoplasmic vesicle membrane	cellular_component	0.89132	1	1	439	124	25884
GO:0030662	coated vesicle membrane	cellular_component	0.89132	1	1	439	124	25884
GO:0032403	protein complex binding	molecular_function	0.89186	1	3	439	301	25884
GO:0000988	transcription factor activity, protein binding	molecular_function	0.89309	1	2	439	222	25884
GO:0042175	nuclear outer membrane-endoplasmic reticulum membrane network	cellular_component	0.89318	1	2	439	222	25884
GO:0043233	organelle lumen	cellular_component	0.89345	1	5	439	464	25884
GO:0070013	intracellular organelle lumen	cellular_component	0.89345	1	5	439	464	25884
GO:0016820	hydrolase activity, acting on acid anhydrides, catalyzing transmembrane movement of substances	molecular_function	0.89346	1	2	439	214	25884
GO:0031974	membrane-enclosed lumen	cellular_component	0.89594	1	5	439	467	25884
GO:0006725	cellular aromatic compound metabolic process	biological_process	0.89641	1	83	439	5445	25884
GO:0019867	outer membrane	cellular_component	0.89702	1	2	439	227	25884
GO:0004674	protein serine/threonine kinase activity	molecular_function	0.89774	1	3	439	298	25884
GO:0007165	signal transduction	biological_process	0.89899	1	18	439	1376	25884
GO:0044432	endoplasmic reticulum part	cellular_component	0.89961	1	2	439	227	25884
GO:0012506	vesicle membrane	cellular_component	0.90085	1	1	439	129	25884
GO:0005794	Golgi apparatus	cellular_component	0.90124	1	1	439	131	25884
GO:0071949	FAD binding	molecular_function	0.90204	1	1	439	129	25884
GO:0005856	cytoskeleton	cellular_component	0.90332	1	3	439	312	25884
GO:0000776	kinetochore	cellular_component	0.90385	1	1	439	136	25884
GO:0044260	cellular macromolecule metabolic process	biological_process	0.90408	1	124	439	7961	25884
GO:0022890	inorganic cation transmembrane transporter activity	molecular_function	0.90426	1	10	439	837	25884
GO:0005525	GTP binding	molecular_function	0.90624	1	8	439	679	25884
GO:0016831	carboxy-lyase activity	molecular_function	0.90633	1	1	439	135	25884
GO:0005524	ATP binding	molecular_function	0.90638	1	53	439	3485	25884
GO:0004222	metalloendopeptidase activity	molecular_function	0.9064	1	1	439	137	25884
GO:0043228	non-membrane-bounded organelle	cellular_component	0.90652	1	15	439	1261	25884
GO:0016667	oxidoreductase activity, acting on a sulfur group of donors	molecular_function	0.90694	1	1	439	149	25884
GO:0006812	cation transport	biological_process	0.90807	1	13	439	1053	25884
GO:0060589	nucleoside-triphosphatase regulator activity	molecular_function	0.91044	1	1	439	139	25884
GO:0032561	guanyl ribonucleotide binding	molecular_function	0.91193	1	8	439	686	25884
GO:0008135	translation factor activity, RNA binding	molecular_function	0.9128	1	1	439	146	25884
GO:0008092	cytoskeletal protein binding	molecular_function	0.91319	1	5	439	472	25884
GO:0051179	localization	biological_process	0.9141	1	59	439	3995	25884
GO:0044433	cytoplasmic vesicle part	cellular_component	0.91466	1	1	439	138	25884
GO:0051276	chromosome organization	biological_process	0.91515	1	5	439	478	25884
GO:0044429	mitochondrial part	cellular_component	0.91638	1	3	439	332	25884
GO:0019001	guanyl nucleotide binding	molecular_function	0.91666	1	8	439	692	25884
GO:0046483	heterocycle metabolic process	biological_process	0.91769	1	82	439	5448	25884
GO:0009124	nucleoside monophosphate biosynthetic process	biological_process	0.91805	1	1	439	148	25884
GO:0006950	response to stress	biological_process	0.91851	1	17	439	1356	25884
GO:0015077	monovalent inorganic cation transmembrane transporter activity	molecular_function	0.91969	1	6	439	568	25884
GO:0046148	pigment biosynthetic process	biological_process	0.92087	1	1	439	141	25884
GO:0005634	nucleus	cellular_component	0.92115	1	33	439	2394	25884
GO:0036094	small molecule binding	molecular_function	0.92472	1	71	439	4637	25884
GO:0005783	endoplasmic reticulum	cellular_component	0.92524	1	3	439	334	25884
GO:0000166	nucleotide binding	molecular_function	0.92556	1	69	439	4516	25884
GO:1901265	nucleoside phosphate binding	molecular_function	0.92556	1	69	439	4516	25884
GO:0009856	pollination	biological_process	0.92568	1	1	439	144	25884
GO:0009875	pollen-pistil interaction	biological_process	0.92568	1	1	439	144	25884
GO:0048544	recognition of pollen	biological_process	0.92568	1	1	439	144	25884
GO:0043232	intracellular non-membrane-bounded organelle	cellular_component	0.92582	1	14	439	1226	25884
GO:0000041	transition metal ion transport	biological_process	0.92596	1	1	439	152	25884
GO:0006790	sulfur compound metabolic process	biological_process	0.92698	1	1	439	148	25884
GO:0006259	DNA metabolic process	biological_process	0.92744	1	17	439	1334	25884
GO:0008037	cell recognition	biological_process	0.92956	1	1	439	147	25884
GO:0016469	proton-transporting two-sector ATPase complex	cellular_component	0.92997	1	2	439	256	25884
GO:0016023	cytoplasmic membrane-bounded vesicle	cellular_component	0.93053	1	1	439	150	25884
GO:0006810	transport	biological_process	0.93335	1	56	439	3868	25884
GO:0007154	cell communication	biological_process	0.93485	1	20	439	1576	25884
GO:0006139	nucleobase-containing compound metabolic process	biological_process	0.9353	1	75	439	5080	25884
GO:1902600	hydrogen ion transmembrane transport	biological_process	0.93631	1	2	439	263	25884
GO:0031988	membrane-bounded vesicle	cellular_component	0.93663	1	1	439	155	25884
GO:0031981	nuclear lumen	cellular_component	0.93789	1	4	439	436	25884
GO:0008237	metallopeptidase activity	molecular_function	0.93882	1	1	439	161	25884
GO:0005216	ion channel activity	molecular_function	0.93924	1	2	439	256	25884
GO:0022838	substrate-specific channel activity	molecular_function	0.93924	1	2	439	256	25884
GO:0044706	multi-multicellular organism process	biological_process	0.93938	1	1	439	156	25884
GO:0015267	channel activity	molecular_function	0.94011	1	2	439	257	25884
GO:0022803	passive transmembrane transporter activity	molecular_function	0.94011	1	2	439	257	25884
GO:0051234	establishment of localization	biological_process	0.94118	1	56	439	3897	25884
GO:0044265	cellular macromolecule catabolic process	biological_process	0.9413	1	2	439	264	25884
GO:0098798	mitochondrial protein complex	cellular_component	0.94214	1	1	439	167	25884
GO:0032559	adenyl ribonucleotide binding	molecular_function	0.94217	1	53	439	3591	25884
GO:0022891	substrate-specific transmembrane transporter activity	molecular_function	0.94242	1	15	439	1244	25884
GO:0009057	macromolecule catabolic process	biological_process	0.94343	1	3	439	354	25884
GO:0003712	transcription cofactor activity	molecular_function	0.94386	1	1	439	168	25884
GO:0004842	ubiquitin-protein transferase activity	molecular_function	0.94414	1	5	439	515	25884
GO:0019787	ubiquitin-like protein transferase activity	molecular_function	0.94414	1	5	439	515	25884
GO:0000989	transcription factor activity, transcription factor binding	molecular_function	0.94478	1	1	439	170	25884
GO:0015075	ion transmembrane transporter activity	molecular_function	0.94492	1	14	439	1179	25884
GO:0044455	mitochondrial membrane part	cellular_component	0.94521	1	1	439	170	25884
GO:0031410	cytoplasmic vesicle	cellular_component	0.94546	1	1	439	164	25884
GO:0005886	plasma membrane	cellular_component	0.94646	1	3	439	358	25884
GO:0030529	ribonucleoprotein complex	cellular_component	0.94698	1	7	439	763	25884
GO:0006511	ubiquitin-dependent protein catabolic process	biological_process	0.947	1	1	439	170	25884
GO:0035639	purine ribonucleoside triphosphate binding	molecular_function	0.94738	1	55	439	3742	25884
GO:0019941	modification-dependent protein catabolic process	biological_process	0.94876	1	1	439	172	25884
GO:0043632	modification-dependent macromolecule catabolic process	biological_process	0.94876	1	1	439	172	25884
GO:0042451	purine nucleoside biosynthetic process	biological_process	0.94933	1	1	439	177	25884
GO:0046129	purine ribonucleoside biosynthetic process	biological_process	0.94933	1	1	439	177	25884
GO:0031982	vesicle	cellular_component	0.95025	1	1	439	169	25884
GO:0071822	protein complex subunit organization	biological_process	0.95035	1	4	439	454	25884
GO:0098662	inorganic cation transmembrane transport	biological_process	0.95126	1	3	439	370	25884
GO:0030554	adenyl nucleotide binding	molecular_function	0.95136	1	53	439	3628	25884
GO:0051701	interaction with host	biological_process	0.95151	1	1	439	173	25884
GO:0098655	cation transmembrane transport	biological_process	0.9519	1	3	439	371	25884
GO:0098660	inorganic ion transmembrane transport	biological_process	0.95192	1	3	439	371	25884
GO:0008324	cation transmembrane transporter activity	molecular_function	0.95256	1	10	439	920	25884
GO:0015078	hydrogen ion transmembrane transporter activity	molecular_function	0.95292	1	3	439	379	25884
GO:0008017	microtubule binding	molecular_function	0.95301	1	1	439	175	25884
GO:0009163	nucleoside biosynthetic process	biological_process	0.9556	1	1	439	185	25884
GO:0042455	ribonucleoside biosynthetic process	biological_process	0.9556	1	1	439	185	25884
GO:1901659	glycosyl compound biosynthetic process	biological_process	0.95702	1	1	439	187	25884
GO:0000775	chromosome, centromeric region	cellular_component	0.95845	1	1	439	185	25884
GO:0009451	RNA modification	biological_process	0.95957	1	2	439	283	25884
GO:0031966	mitochondrial membrane	cellular_component	0.96002	1	2	439	297	25884
GO:0005575	cellular_component	cellular_component	0.96073	1	168	439	10944	25884
GO:0044257	cellular protein catabolic process	biological_process	0.96085	1	1	439	189	25884
GO:0051603	proteolysis involved in cellular protein catabolic process	biological_process	0.96085	1	1	439	189	25884
GO:0006818	hydrogen transport	biological_process	0.96145	1	2	439	297	25884
GO:0015992	proton transport	biological_process	0.96145	1	2	439	297	25884
GO:0016830	carbon-carbon lyase activity	molecular_function	0.96162	1	1	439	186	25884
GO:0006310	DNA recombination	biological_process	0.96194	1	3	439	378	25884
GO:0043604	amide biosynthetic process	biological_process	0.96312	1	10	439	1018	25884
GO:0006352	DNA-templated transcription, initiation	biological_process	0.96482	1	1	439	204	25884
GO:0004190	aspartic-type endopeptidase activity	molecular_function	0.96488	1	1	439	194	25884
GO:0070001	aspartic-type peptidase activity	molecular_function	0.96488	1	1	439	194	25884
GO:0032501	multicellular organismal process	biological_process	0.96489	1	6	439	639	25884
GO:0098687	chromosomal region	cellular_component	0.96497	1	1	439	195	25884
GO:0006457	protein folding	biological_process	0.96535	1	1	439	204	25884
GO:0005740	mitochondrial envelope	cellular_component	0.96562	1	2	439	308	25884
GO:0006461	protein complex assembly	biological_process	0.96604	1	3	439	398	25884
GO:0070271	protein complex biogenesis	biological_process	0.96651	1	3	439	399	25884
GO:0001883	purine nucleoside binding	molecular_function	0.96685	1	55	439	3835	25884
GO:0032549	ribonucleoside binding	molecular_function	0.96685	1	55	439	3835	25884
GO:0032550	purine ribonucleoside binding	molecular_function	0.96685	1	55	439	3835	25884
GO:0006366	transcription from RNA polymerase II promoter	biological_process	0.96705	1	1	439	200	25884
GO:0034062	RNA polymerase activity	molecular_function	0.96719	1	2	439	306	25884
GO:0032555	purine ribonucleotide binding	molecular_function	0.96769	1	55	439	3840	25884
GO:0001882	nucleoside binding	molecular_function	0.96802	1	55	439	3843	25884
GO:0005515	protein binding	molecular_function	0.96851	1	101	439	6777	25884
GO:0044877	macromolecular complex binding	molecular_function	0.96895	1	3	439	401	25884
GO:0016853	isomerase activity	molecular_function	0.96923	1	2	439	309	25884
GO:0043043	peptide biosynthetic process	biological_process	0.97044	1	9	439	968	25884
GO:0072522	purine-containing compound biosynthetic process	biological_process	0.97049	1	1	439	208	25884
GO:0022892	substrate-specific transporter activity	molecular_function	0.97266	1	15	439	1342	25884
GO:0032553	ribonucleotide binding	molecular_function	0.97296	1	55	439	3877	25884
GO:0031090	organelle membrane	cellular_component	0.97331	1	7	439	748	25884
GO:0044459	plasma membrane part	cellular_component	0.9738	1	1	439	211	25884
GO:0017076	purine nucleotide binding	molecular_function	0.97393	1	55	439	3882	25884
GO:0003899	DNA-directed RNA polymerase activity	molecular_function	0.97409	1	1	439	216	25884
GO:0044707	single-multicellular organism process	biological_process	0.97414	1	3	439	418	25884
GO:0009119	ribonucleoside metabolic process	biological_process	0.97447	1	2	439	326	25884
GO:0034641	cellular nitrogen compound metabolic process	biological_process	0.97546	1	89	439	6260	25884
GO:0030163	protein catabolic process	biological_process	0.97548	1	1	439	216	25884
GO:0032268	regulation of cellular protein metabolic process	biological_process	0.97741	1	1	439	214	25884
GO:0043933	macromolecular complex subunit organization	biological_process	0.97809	1	6	439	691	25884
GO:0065003	macromolecular complex assembly	biological_process	0.97816	1	3	439	431	25884
GO:0000152	nuclear ubiquitin ligase complex	cellular_component	0.97881	1	2	439	338	25884
GO:0005680	anaphase-promoting complex	cellular_component	0.97881	1	2	439	338	25884
GO:0031461	cullin-RING ubiquitin ligase complex	cellular_component	0.97881	1	2	439	338	25884
GO:0097367	carbohydrate derivative binding	molecular_function	0.97915	1	55	439	3930	25884
GO:0043603	cellular amide metabolic process	biological_process	0.97945	1	10	439	1083	25884
GO:0030117	membrane coat	cellular_component	0.9796	1	1	439	216	25884
GO:0048475	coated membrane	cellular_component	0.9796	1	1	439	216	25884
GO:0031967	organelle envelope	cellular_component	0.97963	1	2	439	342	25884
GO:0006518	peptide metabolic process	biological_process	0.97978	1	9	439	1009	25884
GO:0000151	ubiquitin ligase complex	cellular_component	0.98011	1	2	439	342	25884
GO:0043168	anion binding	molecular_function	0.98151	1	64	439	4512	25884
GO:0012505	endomembrane system	cellular_component	0.98181	1	5	439	613	25884
GO:0048193	Golgi vesicle transport	biological_process	0.98192	1	1	439	229	25884
GO:0051246	regulation of protein metabolic process	biological_process	0.98213	1	1	439	227	25884
GO:0006886	intracellular protein transport	biological_process	0.98227	1	8	439	850	25884
GO:0034613	cellular protein localization	biological_process	0.98296	1	9	439	934	25884
GO:0070727	cellular macromolecule localization	biological_process	0.98296	1	9	439	934	25884
GO:0007275	multicellular organismal development	biological_process	0.98353	1	1	439	241	25884
GO:0006412	translation	biological_process	0.98361	1	8	439	951	25884
GO:0009165	nucleotide biosynthetic process	biological_process	0.98397	1	1	439	242	25884
GO:1901293	nucleoside phosphate biosynthetic process	biological_process	0.98397	1	1	439	242	25884
GO:1902582	single-organism intracellular transport	biological_process	0.98438	1	4	439	544	25884
GO:0006281	DNA repair	biological_process	0.98439	1	4	439	533	25884
GO:0005739	mitochondrion	cellular_component	0.98462	1	3	439	468	25884
GO:0034622	cellular macromolecular complex assembly	biological_process	0.98464	1	2	439	358	25884
GO:0016887	ATPase activity	molecular_function	0.98622	1	6	439	705	25884
GO:0033554	cellular response to stress	biological_process	0.98624	1	5	439	637	25884
GO:0005654	nucleoplasm	cellular_component	0.98729	1	1	439	257	25884
GO:0044451	nucleoplasm part	cellular_component	0.98729	1	1	439	257	25884
GO:0009116	nucleoside metabolic process	biological_process	0.9873	1	2	439	374	25884
GO:1901657	glycosyl compound metabolic process	biological_process	0.98765	1	2	439	376	25884
GO:0055086	nucleobase-containing small molecule metabolic process	biological_process	0.98802	1	3	439	478	25884
GO:0031975	envelope	cellular_component	0.98814	1	2	439	378	25884
GO:0051716	cellular response to stimulus	biological_process	0.98819	1	22	439	1957	25884
GO:0008270	zinc ion binding	molecular_function	0.98833	1	19	439	1726	25884
GO:0006807	nitrogen compound metabolic process	biological_process	0.98839	1	92	439	6603	25884
GO:0016071	mRNA metabolic process	biological_process	0.98898	1	1	439	257	25884
GO:0009123	nucleoside monophosphate metabolic process	biological_process	0.99045	1	1	439	273	25884
GO:0098796	membrane protein complex	cellular_component	0.99147	1	8	439	956	25884
GO:0043231	intracellular membrane-bounded organelle	cellular_component	0.99149	1	43	439	3450	25884
GO:0043227	membrane-bounded organelle	cellular_component	0.99171	1	43	439	3454	25884
GO:0043623	cellular protein complex assembly	biological_process	0.99222	1	1	439	283	25884
GO:0006974	cellular response to DNA damage stimulus	biological_process	0.99269	1	4	439	596	25884
GO:1901566	organonitrogen compound biosynthetic process	biological_process	0.99362	1	17	439	1736	25884
GO:0006520	cellular amino acid metabolic process	biological_process	0.99372	1	3	439	504	25884
GO:0003676	nucleic acid binding	molecular_function	0.99467	1	60	439	4653	25884
GO:0006091	generation of precursor metabolites and energy	biological_process	0.99473	1	1	439	307	25884
GO:0042278	purine nucleoside metabolic process	biological_process	0.99537	1	1	439	315	25884
GO:0046128	purine ribonucleoside metabolic process	biological_process	0.99537	1	1	439	315	25884
GO:0005488	binding	molecular_function	0.99546	1	240	439	15484	25884
GO:0016779	nucleotidyltransferase activity	molecular_function	0.99692	1	3	439	566	25884
GO:0065008	regulation of biological quality	biological_process	0.997	1	3	439	587	25884
GO:0017111	nucleoside-triphosphatase activity	molecular_function	0.99705	1	11	439	1249	25884
GO:0071702	organic substance transport	biological_process	0.99719	1	13	439	1435	25884
GO:0072521	purine-containing compound metabolic process	biological_process	0.99741	1	1	439	348	25884
GO:0008104	protein localization	biological_process	0.99763	1	9	439	1125	25884
GO:0016818	hydrolase activity, acting on acid anhydrides, in phosphorus-containing anhydrides	molecular_function	0.9977	1	13	439	1433	25884
GO:0015031	protein transport	biological_process	0.9977	1	8	439	1041	25884
GO:0016462	pyrophosphatase activity	molecular_function	0.99782	1	11	439	1277	25884
GO:0046907	intracellular transport	biological_process	0.99782	1	8	439	1046	25884
GO:0044428	nuclear part	cellular_component	0.99782	1	6	439	893	25884
GO:0043226	organelle	cellular_component	0.99803	1	52	439	4360	25884
GO:0043531	ADP binding	molecular_function	0.99804	1	1	439	343	25884
GO:0045184	establishment of protein localization	biological_process	0.99838	1	8	439	1072	25884
GO:0044444	cytoplasmic part	cellular_component	0.99865	1	18	439	1994	25884
GO:0009117	nucleotide metabolic process	biological_process	0.99903	1	1	439	403	25884
GO:1901564	organonitrogen compound metabolic process	biological_process	0.99908	1	22	439	2329	25884
GO:0006753	nucleoside phosphate metabolic process	biological_process	0.99911	1	1	439	408	25884
GO:0043229	intracellular organelle	cellular_component	0.99924	1	49	439	4293	25884
GO:0016817	hydrolase activity, acting on acid anhydrides	molecular_function	0.9993	1	13	439	1547	25884
GO:0033036	macromolecule localization	biological_process	0.99942	1	9	439	1252	25884
GO:1902494	catalytic complex	cellular_component	0.99945	1	4	439	807	25884
GO:0051641	cellular localization	biological_process	0.99949	1	9	439	1255	25884
GO:1990234	transferase complex	cellular_component	0.99949	1	2	439	583	25884
GO:0051649	establishment of localization in cell	biological_process	0.99952	1	8	439	1171	25884
GO:0044422	organelle part	cellular_component	0.99966	1	18	439	2066	25884
GO:0004386	helicase activity	molecular_function	0.9997	1	1	439	450	25884
GO:0016192	vesicle-mediated transport	biological_process	0.99978	1	2	439	610	25884
GO:0044446	intracellular organelle part	cellular_component	0.9998	1	17	439	2039	25884
GO:0043234	protein complex	cellular_component	0.99989	1	21	439	2433	25884
GO:0005623	cell	cellular_component	0.99994	1	71	439	6143	25884
GO:0044464	cell part	cellular_component	0.99994	1	71	439	6143	25884
GO:0005737	cytoplasm	cellular_component	0.99994	1	21	439	2550	25884
GO:0032991	macromolecular complex	cellular_component	0.99998	1	27	439	3138	25884
GO:0003723	RNA binding	molecular_function	0.99999	1	4	439	1098	25884
GO:0044424	intracellular part	cellular_component	1	1	56	439	5426	25884
GO:0005622	intracellular	cellular_component	1	1	57	439	5582	25884

## Sheet: ovate vs broad-ovate.GO
GO_accession	Description	Term_type	Over_represented_pValue	Corrected_pValue	DEG_item	DEG_list	Bg_item	Bg_list
GO:0006355	regulation of transcription, DNA-templated	biological_process	0.00012967	0.17309	93	707	2301	25884
GO:1903506	regulation of nucleic acid-templated transcription	biological_process	0.00012967	0.17309	93	707	2301	25884
GO:2001141	regulation of RNA biosynthetic process	biological_process	0.00014487	0.17309	93	707	2308	25884
GO:0051252	regulation of RNA metabolic process	biological_process	0.00014947	0.17309	93	707	2310	25884
GO:0019219	regulation of nucleobase-containing compound metabolic process	biological_process	0.00021189	0.1963	93	707	2334	25884
GO:2000112	regulation of cellular macromolecule biosynthetic process	biological_process	0.00051608	0.28846	95	707	2450	25884
GO:0009889	regulation of biosynthetic process	biological_process	0.00056047	0.28846	95	707	2456	25884
GO:0010556	regulation of macromolecule biosynthetic process	biological_process	0.00056047	0.28846	95	707	2456	25884
GO:0031326	regulation of cellular biosynthetic process	biological_process	0.00056047	0.28846	95	707	2456	25884
GO:0051171	regulation of nitrogen compound metabolic process	biological_process	0.00063282	0.29312	95	707	2465	25884
GO:0010468	regulation of gene expression	biological_process	0.00083789	0.34954	95	707	2485	25884
GO:0006468	protein phosphorylation	biological_process	0.00090553	0.34954	74	707	1739	25884
GO:0080090	regulation of primary metabolic process	biological_process	0.0011023	0.39277	97	707	2572	25884
GO:0006351	transcription, DNA-templated	biological_process	0.0013681	0.42248	100	707	2718	25884
GO:0097659	nucleic acid-templated transcription	biological_process	0.0013681	0.42248	100	707	2718	25884
GO:0032774	RNA biosynthetic process	biological_process	0.0016066	0.46511	101	707	2762	25884
GO:0031323	regulation of cellular metabolic process	biological_process	0.0017543	0.47798	96	707	2582	25884
GO:0060255	regulation of macromolecule metabolic process	biological_process	0.0019102	0.49155	96	707	2586	25884
GO:0009055	electron carrier activity	molecular_function	0.0025043	0.56261	18	707	348	25884
GO:0019222	regulation of metabolic process	biological_process	0.0026145	0.56261	99	707	2712	25884
GO:0004672	protein kinase activity	molecular_function	0.0026316	0.56261	76	707	1874	25884
GO:0071554	cell wall organization or biogenesis	biological_process	0.0026722	0.56261	12	707	168	25884
GO:0008725	DNA-3-methyladenine glycosylase activity	molecular_function	0.0044605	0.83367	3	707	12	25884
GO:0043733	DNA-3-methylbase glycosylase activity	molecular_function	0.0044605	0.83367	3	707	12	25884
GO:0016310	phosphorylation	biological_process	0.0049213	0.83367	75	707	1902	25884
GO:0015740	C4-dicarboxylate transport	biological_process	0.0049982	0.83367	5	707	40	25884
GO:0030173	integral component of Golgi membrane	cellular_component	0.0051179	0.83367	3	707	13	25884
GO:0031228	intrinsic component of Golgi membrane	cellular_component	0.0051179	0.83367	3	707	13	25884
GO:0034654	nucleobase-containing compound biosynthetic process	biological_process	0.0054005	0.83367	105	707	3010	25884
GO:0003905	alkylbase DNA N-glycosylase activity	molecular_function	0.0054556	0.83367	3	707	13	25884
GO:0004197	cysteine-type endopeptidase activity	molecular_function	0.0055794	0.83367	10	707	139	25884
GO:0043565	sequence-specific DNA binding	molecular_function	0.006049	0.87559	25	707	526	25884
GO:0005544	calcium-dependent phospholipid binding	molecular_function	0.0080111	1	3	707	16	25884
GO:0008233	peptidase activity	molecular_function	0.0083136	1	45	707	1109	25884
GO:0071555	cell wall organization	biological_process	0.008575	1	9	707	124	25884
GO:0050794	regulation of cellular process	biological_process	0.0086004	1	138	707	4160	25884
GO:0004568	chitinase activity	molecular_function	0.0091154	1	3	707	18	25884
GO:0045229	external encapsulating structure organization	biological_process	0.0092775	1	9	707	126	25884
GO:0035251	UDP-glucosyltransferase activity	molecular_function	0.0093195	1	7	707	79	25884
GO:0006952	defense response	biological_process	0.0097307	1	17	707	343	25884
GO:0050789	regulation of biological process	biological_process	0.0098144	1	143	707	4347	25884
GO:0006796	phosphate-containing compound metabolic process	biological_process	0.0099175	1	93	707	2542	25884
GO:0018130	heterocycle biosynthetic process	biological_process	0.010263	1	113	707	3341	25884
GO:0006793	phosphorus metabolic process	biological_process	0.010298	1	93	707	2546	25884
GO:0020037	heme binding	molecular_function	0.010355	1	25	707	546	25884
GO:0016998	cell wall macromolecule catabolic process	biological_process	0.011128	1	3	707	19	25884
GO:0016773	phosphotransferase activity, alcohol group as acceptor	molecular_function	0.012364	1	81	707	2161	25884
GO:0006032	chitin catabolic process	biological_process	0.012678	1	3	707	20	25884
GO:0046348	amino sugar catabolic process	biological_process	0.012678	1	3	707	20	25884
GO:1901072	glucosamine-containing compound catabolic process	biological_process	0.012678	1	3	707	20	25884
GO:0046906	tetrapyrrole binding	molecular_function	0.012748	1	25	707	556	25884
GO:0006835	dicarboxylic acid transport	biological_process	0.013081	1	5	707	50	25884
GO:0004014	adenosylmethionine decarboxylase activity	molecular_function	0.013456	1	2	707	7	25884
GO:0006597	spermine biosynthetic process	biological_process	0.013456	1	2	707	7	25884
GO:0008215	spermine metabolic process	biological_process	0.013456	1	2	707	7	25884
GO:0008216	spermidine metabolic process	biological_process	0.013456	1	2	707	7	25884
GO:0008295	spermidine biosynthetic process	biological_process	0.013456	1	2	707	7	25884
GO:0016301	kinase activity	molecular_function	0.014232	1	84	707	2270	25884
GO:0006040	amino sugar metabolic process	biological_process	0.014386	1	4	707	36	25884
GO:0006508	proteolysis	biological_process	0.014536	1	41	707	1020	25884
GO:0008150	biological_process	biological_process	0.014796	1	542	707	18791	25884
GO:0019104	DNA N-glycosylase activity	molecular_function	0.014833	1	3	707	19	25884
GO:0030599	pectinesterase activity	molecular_function	0.015113	1	7	707	91	25884
GO:0042545	cell wall modification	biological_process	0.015113	1	7	707	91	25884
GO:0005787	signal peptidase complex	cellular_component	0.016127	1	4	707	37	25884
GO:0006465	signal peptide processing	biological_process	0.016127	1	4	707	37	25884
GO:0042126	nitrate metabolic process	biological_process	0.016331	1	2	707	7	25884
GO:0042128	nitrate assimilation	biological_process	0.016331	1	2	707	7	25884
GO:2001057	reactive nitrogen species metabolic process	biological_process	0.016331	1	2	707	7	25884
GO:0003677	DNA binding	molecular_function	0.016754	1	100	707	2964	25884
GO:0015743	malate transport	biological_process	0.017908	1	4	707	36	25884
GO:0052689	carboxylic ester hydrolase activity	molecular_function	0.017925	1	12	707	218	25884
GO:0004175	endopeptidase activity	molecular_function	0.017998	1	30	707	714	25884
GO:0042221	response to chemical	biological_process	0.019225	1	17	707	362	25884
GO:0009309	amine biosynthetic process	biological_process	0.019326	1	3	707	22	25884
GO:0042401	cellular biogenic amine biosynthetic process	biological_process	0.019326	1	3	707	22	25884
GO:0043170	macromolecule metabolic process	biological_process	0.019425	1	269	707	8759	25884
GO:0006030	chitin metabolic process	biological_process	0.01979	1	3	707	23	25884
GO:1901071	glucosamine-containing compound metabolic process	biological_process	0.01979	1	3	707	23	25884
GO:0009627	systemic acquired resistance	biological_process	0.019973	1	2	707	10	25884
GO:0009814	defense response, incompatible interaction	biological_process	0.019973	1	2	707	10	25884
GO:0010112	regulation of systemic acquired resistance	biological_process	0.019973	1	2	707	10	25884
GO:0006026	aminoglycan catabolic process	biological_process	0.02012	1	3	707	23	25884
GO:0046527	glucosyltransferase activity	molecular_function	0.020202	1	7	707	92	25884
GO:0019438	aromatic compound biosynthetic process	biological_process	0.020353	1	109	707	3290	25884
GO:1901362	organic cyclic compound biosynthetic process	biological_process	0.020776	1	116	707	3530	25884
GO:0004806	triglyceride lipase activity	molecular_function	0.020859	1	3	707	21	25884
GO:0006824	cobalt ion transport	biological_process	0.021319	1	1	707	1	25884
GO:0015087	cobalt ion transmembrane transporter activity	molecular_function	0.021319	1	1	707	1	25884
GO:0065007	biological regulation	biological_process	0.022198	1	146	707	4562	25884
GO:0052126	movement in host environment	biological_process	0.022968	1	5	707	59	25884
GO:0052192	movement in environment of other organism involved in symbiotic interaction	biological_process	0.022968	1	5	707	59	25884
GO:0070011	peptidase activity, acting on L-amino acid peptides	molecular_function	0.02306	1	40	707	1027	25884
GO:0044036	cell wall macromolecule metabolic process	biological_process	0.02502	1	3	707	25	25884
GO:0006855	drug transmembrane transport	biological_process	0.025391	1	6	707	78	25884
GO:0015893	drug transport	biological_process	0.025391	1	6	707	78	25884
GO:0005845	mRNA cap binding complex	cellular_component	0.026469	1	1	707	1	25884
GO:0034518	RNA cap binding complex	cellular_component	0.026469	1	1	707	1	25884
GO:0015238	drug transmembrane transporter activity	molecular_function	0.026911	1	6	707	79	25884
GO:0090484	drug transporter activity	molecular_function	0.026911	1	6	707	79	25884
GO:0006742	NADP catabolic process	biological_process	0.028336	1	1	707	1	25884
GO:0009109	coenzyme catabolic process	biological_process	0.028336	1	1	707	1	25884
GO:0019364	pyridine nucleotide catabolic process	biological_process	0.028336	1	1	707	1	25884
GO:0072526	pyridine-containing compound catabolic process	biological_process	0.028336	1	1	707	1	25884
GO:0043190	ATP-binding cassette (ABC) transporter complex	cellular_component	0.028361	1	2	707	10	25884
GO:0006595	polyamine metabolic process	biological_process	0.028583	1	2	707	10	25884
GO:0006596	polyamine biosynthetic process	biological_process	0.028583	1	2	707	10	25884
GO:0097164	ammonium ion metabolic process	biological_process	0.028583	1	2	707	10	25884
GO:0031221	arabinan metabolic process	biological_process	0.029856	1	1	707	1	25884
GO:0042493	response to drug	biological_process	0.029892	1	6	707	81	25884
GO:0004511	tyrosine 3-monooxygenase activity	molecular_function	0.0303	1	1	707	1	25884
GO:0001071	nucleic acid binding transcription factor activity	molecular_function	0.034296	1	39	707	1060	25884
GO:0003700	transcription factor activity, sequence-specific DNA binding	molecular_function	0.034296	1	39	707	1060	25884
GO:0019538	protein metabolic process	biological_process	0.034882	1	147	707	4603	25884
GO:0008234	cysteine-type peptidase activity	molecular_function	0.035623	1	11	707	211	25884
GO:1901136	carbohydrate derivative catabolic process	biological_process	0.03586	1	5	707	67	25884
GO:0006022	aminoglycan metabolic process	biological_process	0.03599	1	4	707	47	25884
GO:0016042	lipid catabolic process	biological_process	0.037454	1	5	707	65	25884
GO:0010496	intercellular transport	biological_process	0.037655	1	3	707	29	25884
GO:0044000	movement in host	biological_process	0.037655	1	3	707	29	25884
GO:0046739	transport of virus in multicellular host	biological_process	0.037655	1	3	707	29	25884
GO:0046740	transport of virus in host, cell to cell	biological_process	0.037655	1	3	707	29	25884
GO:0051814	movement in other organism involved in symbiotic interaction	biological_process	0.037655	1	3	707	29	25884
GO:1902586	multi-organism intercellular transport	biological_process	0.037655	1	3	707	29	25884
GO:0032101	regulation of response to external stimulus	biological_process	0.038745	1	3	707	29	25884
GO:0008289	lipid binding	molecular_function	0.039473	1	13	707	269	25884
GO:0015035	protein disulfide oxidoreductase activity	molecular_function	0.039546	1	6	707	104	25884
GO:0015036	disulfide oxidoreductase activity	molecular_function	0.039546	1	6	707	104	25884
GO:0016799	hydrolase activity, hydrolyzing N-glycosyl compounds	molecular_function	0.039973	1	3	707	28	25884
GO:0016798	hydrolase activity, acting on glycosyl bonds	molecular_function	0.041334	1	28	707	702	25884
GO:0044238	primary metabolic process	biological_process	0.042569	1	324	707	10855	25884
GO:0000735	removal of nonhomologous ends	biological_process	0.044296	1	1	707	2	25884
GO:0000736	double-strand break repair via single-strand annealing, removal of nonhomologous ends	biological_process	0.044296	1	1	707	2	25884
GO:0006312	mitotic recombination	biological_process	0.044296	1	1	707	2	25884
GO:0007533	mating type switching	biological_process	0.044296	1	1	707	2	25884
GO:0007534	gene conversion at mating-type locus	biological_process	0.044296	1	1	707	2	25884
GO:0022413	reproductive process in single-celled organism	biological_process	0.044296	1	1	707	2	25884
GO:0035822	gene conversion	biological_process	0.044296	1	1	707	2	25884
GO:0045002	double-strand break repair via single-strand annealing	biological_process	0.044296	1	1	707	2	25884
GO:0070336	flap-structured DNA binding	molecular_function	0.044296	1	1	707	2	25884
GO:0009725	response to hormone	biological_process	0.044698	1	7	707	130	25884
GO:0045088	regulation of innate immune response	biological_process	0.044944	1	2	707	14	25884
GO:0005375	copper ion transmembrane transporter activity	molecular_function	0.044991	1	2	707	14	25884
GO:0035434	copper ion transmembrane transport	biological_process	0.044991	1	2	707	14	25884
GO:0051287	NAD binding	molecular_function	0.045265	1	11	707	218	25884
GO:0032797	SMN complex	cellular_component	0.046364	1	1	707	2	25884
GO:0003997	acyl-CoA oxidase activity	molecular_function	0.046803	1	2	707	12	25884
GO:0010033	response to organic substance	biological_process	0.048975	1	8	707	156	25884
GO:0006464	cellular protein modification process	biological_process	0.051063	1	86	707	2499	25884
GO:0036211	protein modification process	biological_process	0.051063	1	86	707	2499	25884
GO:0008063	Toll signaling pathway	biological_process	0.05112	1	1	707	2	25884
GO:0005882	intermediate filament	cellular_component	0.051651	1	4	707	49	25884
GO:0045111	intermediate filament cytoskeleton	cellular_component	0.051651	1	4	707	49	25884
GO:0001514	selenocysteine incorporation	biological_process	0.05176	1	2	707	13	25884
GO:0006451	translational readthrough	biological_process	0.05176	1	2	707	13	25884
GO:0071704	organic substance metabolic process	biological_process	0.053361	1	336	707	11342	25884
GO:0006891	intra-Golgi vesicle-mediated transport	biological_process	0.054334	1	4	707	50	25884
GO:0006635	fatty acid beta-oxidation	biological_process	0.054554	1	2	707	13	25884
GO:0009062	fatty acid catabolic process	biological_process	0.054554	1	2	707	13	25884
GO:0019395	fatty acid oxidation	biological_process	0.054554	1	2	707	13	25884
GO:0034440	lipid oxidation	biological_process	0.054554	1	2	707	13	25884
GO:0006777	Mo-molybdopterin cofactor biosynthetic process	biological_process	0.055214	1	3	707	31	25884
GO:0019720	Mo-molybdopterin cofactor metabolic process	biological_process	0.055214	1	3	707	31	25884
GO:0044766	multi-organism transport	biological_process	0.05755	1	3	707	34	25884
GO:0046794	transport of virus	biological_process	0.05755	1	3	707	34	25884
GO:1902579	multi-organism localization	biological_process	0.05755	1	3	707	34	25884
GO:0008733	L-arabinose isomerase activity	molecular_function	0.058642	1	1	707	2	25884
GO:0043772	acyl-phosphate glycerol-3-phosphate acyltransferase activity	molecular_function	0.058913	1	1	707	2	25884
GO:0016337	single organismal cell-cell adhesion	biological_process	0.059102	1	1	707	2	25884
GO:0098602	single organism cell adhesion	biological_process	0.059102	1	1	707	2	25884
GO:0016714	oxidoreductase activity, acting on paired donors, with incorporation or reduction of molecular oxygen, reduced pteridine as one donor, and incorporation of one atom of oxygen	molecular_function	0.059645	1	1	707	2	25884
GO:0031532	actin cytoskeleton reorganization	biological_process	0.059713	1	1	707	2	25884
GO:0090630	activation of GTPase activity	biological_process	0.059713	1	1	707	2	25884
GO:0016759	cellulose synthase activity	molecular_function	0.059722	1	4	707	49	25884
GO:0016760	cellulose synthase (UDP-forming) activity	molecular_function	0.059722	1	4	707	49	25884
GO:0033646	host intracellular part	cellular_component	0.05982	1	5	707	76	25884
GO:0043656	intracellular region of host	cellular_component	0.05982	1	5	707	76	25884
GO:0098533	ATPase dependent transmembrane transport complex	cellular_component	0.059922	1	2	707	15	25884
GO:1904564	Nbp35-Cfd1 ATPase complex	cellular_component	0.059922	1	2	707	15	25884
GO:0008544	epidermis development	biological_process	0.060029	1	2	707	14	25884
GO:0004661	protein geranylgeranyltransferase activity	molecular_function	0.060045	1	1	707	2	25884
GO:0004663	Rab geranylgeranyltransferase activity	molecular_function	0.060045	1	1	707	2	25884
GO:0006825	copper ion transport	biological_process	0.060742	1	2	707	17	25884
GO:0009719	response to endogenous stimulus	biological_process	0.060987	1	7	707	138	25884
GO:0006643	membrane lipid metabolic process	biological_process	0.061181	1	9	707	177	25884
GO:0015696	ammonium transport	biological_process	0.061685	1	3	707	32	25884
GO:0051274	beta-glucan biosynthetic process	biological_process	0.061979	1	5	707	72	25884
GO:0071941	nitrogen cycle metabolic process	biological_process	0.062684	1	2	707	14	25884
GO:0001076	transcription factor activity, RNA polymerase II transcription factor binding	molecular_function	0.063155	1	6	707	104	25884
GO:0001104	RNA polymerase II transcription cofactor activity	molecular_function	0.063155	1	6	707	104	25884
GO:0019725	cellular homeostasis	biological_process	0.063272	1	10	707	231	25884
GO:0006644	phospholipid metabolic process	biological_process	0.065701	1	11	707	233	25884
GO:0008152	metabolic process	biological_process	0.065907	1	408	707	14041	25884
GO:0045087	innate immune response	biological_process	0.066416	1	2	707	17	25884
GO:0008519	ammonium transmembrane transporter activity	molecular_function	0.06683	1	3	707	33	25884
GO:0006950	response to stress	biological_process	0.068044	1	46	707	1356	25884
GO:0016491	oxidoreductase activity	molecular_function	0.068332	1	85	707	2647	25884
GO:0030151	molybdenum ion binding	molecular_function	0.069561	1	2	707	16	25884
GO:0044242	cellular lipid catabolic process	biological_process	0.069912	1	2	707	15	25884
GO:0016592	mediator complex	cellular_component	0.070626	1	6	707	107	25884
GO:0016157	sucrose synthase activity	molecular_function	0.070988	1	2	707	15	25884
GO:0072329	monocarboxylic acid catabolic process	biological_process	0.071148	1	2	707	15	25884
GO:0042592	homeostatic process	biological_process	0.071703	1	12	707	292	25884
GO:0003785	actin monomer binding	molecular_function	0.071726	1	1	707	3	25884
GO:0009254	peptidoglycan turnover	biological_process	0.071987	1	1	707	3	25884
GO:0006336	DNA replication-independent nucleosome assembly	biological_process	0.073321	1	1	707	3	25884
GO:0031055	chromatin remodeling at centromere	biological_process	0.073321	1	1	707	3	25884
GO:0034080	CENP-A containing nucleosome assembly	biological_process	0.073321	1	1	707	3	25884
GO:0034724	DNA replication-independent nucleosome organization	biological_process	0.073321	1	1	707	3	25884
GO:0043486	histone exchange	biological_process	0.073321	1	1	707	3	25884
GO:0061641	CENP-A containing chromatin organization	biological_process	0.073321	1	1	707	3	25884
GO:0080134	regulation of response to stress	biological_process	0.074985	1	3	707	37	25884
GO:0010340	carboxyl-O-methyltransferase activity	molecular_function	0.076402	1	4	707	58	25884
GO:0051998	protein carboxyl O-methyltransferase activity	molecular_function	0.076402	1	4	707	58	25884
GO:0017148	negative regulation of translation	biological_process	0.076512	1	1	707	3	25884
GO:0034249	negative regulation of cellular amide metabolic process	biological_process	0.076512	1	1	707	3	25884
GO:0051273	beta-glucan metabolic process	biological_process	0.077952	1	5	707	77	25884
GO:0016634	oxidoreductase activity, acting on the CH-CH group of donors, oxygen as acceptor	molecular_function	0.07819	1	2	707	16	25884
GO:0008236	serine-type peptidase activity	molecular_function	0.079212	1	17	707	407	25884
GO:0017171	serine hydrolase activity	molecular_function	0.079212	1	17	707	407	25884
GO:0004126	cytidine deaminase activity	molecular_function	0.081574	1	1	707	3	25884
GO:0006216	cytidine catabolic process	biological_process	0.081574	1	1	707	3	25884
GO:0009164	nucleoside catabolic process	biological_process	0.081574	1	1	707	3	25884
GO:0009972	cytidine deamination	biological_process	0.081574	1	1	707	3	25884
GO:0042454	ribonucleoside catabolic process	biological_process	0.081574	1	1	707	3	25884
GO:0046087	cytidine metabolic process	biological_process	0.081574	1	1	707	3	25884
GO:0046133	pyrimidine ribonucleoside catabolic process	biological_process	0.081574	1	1	707	3	25884
GO:0046135	pyrimidine nucleoside catabolic process	biological_process	0.081574	1	1	707	3	25884
GO:0072529	pyrimidine-containing compound catabolic process	biological_process	0.081574	1	1	707	3	25884
GO:1901658	glycosyl compound catabolic process	biological_process	0.081574	1	1	707	3	25884
GO:0006284	base-excision repair	biological_process	0.082924	1	3	707	36	25884
GO:0006664	glycolipid metabolic process	biological_process	0.084137	1	8	707	162	25884
GO:0035737	injection of substance in to other organism	biological_process	0.084393	1	1	707	3	25884
GO:0035738	envenomation resulting in modification of morphology or physiology of other organism	biological_process	0.084393	1	1	707	3	25884
GO:0044559	envenomation resulting in modulation of voltage-gated potassium channel activity in other organism	biological_process	0.084393	1	1	707	3	25884
GO:0044560	envenomation resulting in modulation of ion channel activity in other organism	biological_process	0.084393	1	1	707	3	25884
GO:0044562	envenomation resulting in negative regulation of voltage-gated potassium channel activity in other organism	biological_process	0.084393	1	1	707	3	25884
GO:0044564	envenomation resulting in occlusion of the pore of voltage-gated potassium channel in other organism	biological_process	0.084393	1	1	707	3	25884
GO:0009250	glucan biosynthetic process	biological_process	0.084618	1	5	707	79	25884
GO:0009249	protein lipoylation	biological_process	0.084773	1	1	707	3	25884
GO:0018065	protein-cofactor linkage	biological_process	0.084773	1	1	707	3	25884
GO:0030908	protein splicing	biological_process	0.085613	1	1	707	3	25884
GO:0004560	alpha-L-fucosidase activity	molecular_function	0.086187	1	1	707	3	25884
GO:0015928	fucosidase activity	molecular_function	0.086187	1	1	707	3	25884
GO:0006820	anion transport	biological_process	0.087021	1	12	707	277	25884
GO:0043547	positive regulation of GTPase activity	biological_process	0.087173	1	1	707	3	25884
GO:0000186	activation of MAPKK activity	biological_process	0.087342	1	1	707	3	25884
GO:0001678	cellular glucose homeostasis	biological_process	0.087342	1	1	707	3	25884
GO:0008343	adult feeding behavior	biological_process	0.087342	1	1	707	3	25884
GO:0030534	adult behavior	biological_process	0.087342	1	1	707	3	25884
GO:0032094	response to food	biological_process	0.087342	1	1	707	3	25884
GO:0032095	regulation of response to food	biological_process	0.087342	1	1	707	3	25884
GO:0032096	negative regulation of response to food	biological_process	0.087342	1	1	707	3	25884
GO:0032098	regulation of appetite	biological_process	0.087342	1	1	707	3	25884
GO:0032099	negative regulation of appetite	biological_process	0.087342	1	1	707	3	25884
GO:0032104	regulation of response to extracellular stimulus	biological_process	0.087342	1	1	707	3	25884
GO:0032105	negative regulation of response to extracellular stimulus	biological_process	0.087342	1	1	707	3	25884
GO:0032107	regulation of response to nutrient levels	biological_process	0.087342	1	1	707	3	25884
GO:0032108	negative regulation of response to nutrient levels	biological_process	0.087342	1	1	707	3	25884
GO:0032147	activation of protein kinase activity	biological_process	0.087342	1	1	707	3	25884
GO:0033500	carbohydrate homeostasis	biological_process	0.087342	1	1	707	3	25884
GO:0033674	positive regulation of kinase activity	biological_process	0.087342	1	1	707	3	25884
GO:0042593	glucose homeostasis	biological_process	0.087342	1	1	707	3	25884
GO:0044708	single-organism behavior	biological_process	0.087342	1	1	707	3	25884
GO:0045860	positive regulation of protein kinase activity	biological_process	0.087342	1	1	707	3	25884
GO:0051347	positive regulation of transferase activity	biological_process	0.087342	1	1	707	3	25884
GO:0015849	organic acid transport	biological_process	0.087494	1	8	707	163	25884
GO:0046942	carboxylic acid transport	biological_process	0.087494	1	8	707	163	25884
GO:0005275	amine transmembrane transporter activity	molecular_function	0.088842	1	1	707	3	25884
GO:0015101	organic cation transmembrane transporter activity	molecular_function	0.088842	1	1	707	3	25884
GO:0015665	alcohol transmembrane transporter activity	molecular_function	0.088842	1	1	707	3	25884
GO:0015695	organic cation transport	biological_process	0.088842	1	1	707	3	25884
GO:0015837	amine transport	biological_process	0.088842	1	1	707	3	25884
GO:0034228	ethanolamine transmembrane transporter activity	molecular_function	0.088842	1	1	707	3	25884
GO:0034229	ethanolamine transport	biological_process	0.088842	1	1	707	3	25884
GO:0007530	sex determination	biological_process	0.089151	1	1	707	4	25884
GO:0007531	mating type determination	biological_process	0.089151	1	1	707	4	25884
GO:0045165	cell fate commitment	biological_process	0.089151	1	1	707	4	25884
GO:0015711	organic anion transport	biological_process	0.089638	1	8	707	164	25884
GO:0008061	chitin binding	molecular_function	0.090108	1	2	707	20	25884
GO:0032324	molybdopterin cofactor biosynthetic process	biological_process	0.091336	1	3	707	38	25884
GO:0043545	molybdopterin cofactor metabolic process	biological_process	0.091336	1	3	707	38	25884
GO:0006357	regulation of transcription from RNA polymerase II promoter	biological_process	0.091827	1	6	707	114	25884
GO:0045454	cell redox homeostasis	biological_process	0.093411	1	8	707	188	25884
GO:0055114	oxidation-reduction process	biological_process	0.095348	1	80	707	2500	25884
GO:0016485	protein processing	biological_process	0.096011	1	5	707	89	25884
GO:0051604	protein maturation	biological_process	0.096011	1	5	707	89	25884
GO:0009607	response to biotic stimulus	biological_process	0.096247	1	10	707	244	25884
GO:0016702	oxidoreductase activity, acting on single donors with incorporation of molecular oxygen, incorporation of two atoms of oxygen	molecular_function	0.096428	1	4	707	64	25884
GO:0009379	Holliday junction helicase complex	cellular_component	0.096502	1	1	707	4	25884
GO:0048476	Holliday junction resolvase complex	cellular_component	0.096502	1	1	707	4	25884
GO:0050896	response to stimulus	biological_process	0.096523	1	92	707	2969	25884
GO:0030244	cellulose biosynthetic process	biological_process	0.097755	1	4	707	59	25884
GO:0005985	sucrose metabolic process	biological_process	0.097756	1	2	707	18	25884
GO:0006413	translational initiation	biological_process	0.098653	1	4	707	69	25884
GO:0046983	protein dimerization activity	molecular_function	0.10042	1	20	707	544	25884
GO:0051189	prosthetic group metabolic process	biological_process	0.1019	1	3	707	40	25884
GO:0007155	cell adhesion	biological_process	0.10231	1	7	707	141	25884
GO:0002831	regulation of response to biotic stimulus	biological_process	0.10252	1	2	707	21	25884
GO:0015658	branched-chain amino acid transmembrane transporter activity	molecular_function	0.10261	1	1	707	4	25884
GO:0015803	branched-chain amino acid transport	biological_process	0.10261	1	1	707	4	25884
GO:0030001	metal ion transport	biological_process	0.10277	1	23	707	640	25884
GO:0005524	ATP binding	molecular_function	0.10395	1	114	707	3485	25884
GO:0098542	defense response to other organism	biological_process	0.10431	1	7	707	148	25884
GO:0015297	antiporter activity	molecular_function	0.10472	1	7	707	136	25884
GO:0015556	C4-dicarboxylate transmembrane transporter activity	molecular_function	0.10504	1	1	707	4	25884
GO:0033313	meiotic cell cycle checkpoint	biological_process	0.10624	1	1	707	4	25884
GO:0040020	regulation of meiotic nuclear division	biological_process	0.10624	1	1	707	4	25884
GO:0045835	negative regulation of meiotic nuclear division	biological_process	0.10624	1	1	707	4	25884
GO:0051445	regulation of meiotic cell cycle	biological_process	0.10624	1	1	707	4	25884
GO:0051447	negative regulation of meiotic cell cycle	biological_process	0.10624	1	1	707	4	25884
GO:0051598	meiotic recombination checkpoint	biological_process	0.10624	1	1	707	4	25884
GO:0030354	melanin-concentrating hormone activity	molecular_function	0.10773	1	1	707	4	25884
GO:0007160	cell-matrix adhesion	biological_process	0.1088	1	1	707	4	25884
GO:0031589	cell-substrate adhesion	biological_process	0.1088	1	1	707	4	25884
GO:0009311	oligosaccharide metabolic process	biological_process	0.11034	1	6	707	114	25884
GO:0043412	macromolecule modification	biological_process	0.11244	1	91	707	2781	25884
GO:0005741	mitochondrial outer membrane	cellular_component	0.11251	1	6	707	124	25884
GO:0031968	organelle outer membrane	cellular_component	0.11251	1	6	707	124	25884
GO:0035639	purine ribonucleoside triphosphate binding	molecular_function	0.11268	1	121	707	3742	25884
GO:0042025	host cell nucleus	cellular_component	0.1128	1	4	707	67	25884
GO:0005665	DNA-directed RNA polymerase II, core complex	cellular_component	0.11485	1	1	707	4	25884
GO:0007249	I-kappaB kinase/NF-kappaB signaling	biological_process	0.11555	1	1	707	4	25884
GO:0043122	regulation of I-kappaB kinase/NF-kappaB signaling	biological_process	0.11555	1	1	707	4	25884
GO:0043123	positive regulation of I-kappaB kinase/NF-kappaB signaling	biological_process	0.11555	1	1	707	4	25884
GO:1903509	liposaccharide metabolic process	biological_process	0.11801	1	8	707	175	25884
GO:0004553	hydrolase activity, hydrolyzing O-glycosyl compounds	molecular_function	0.11821	1	24	707	658	25884
GO:1901363	heterocyclic compound binding	molecular_function	0.11955	1	261	707	8738	25884
GO:0097159	organic cyclic compound binding	molecular_function	0.11987	1	261	707	8739	25884
GO:0008654	phospholipid biosynthetic process	biological_process	0.1209	1	6	707	120	25884
GO:0016051	carbohydrate biosynthetic process	biological_process	0.12095	1	10	707	229	25884
GO:0030243	cellulose metabolic process	biological_process	0.12209	1	4	707	64	25884
GO:0016772	transferase activity, transferring phosphorus-containing groups	molecular_function	0.12421	1	95	707	2930	25884
GO:0004853	uroporphyrinogen decarboxylase activity	molecular_function	0.12678	1	1	707	5	25884
GO:0009312	oligosaccharide biosynthetic process	biological_process	0.12727	1	5	707	93	25884
GO:0000139	Golgi membrane	cellular_component	0.12729	1	4	707	68	25884
GO:0016849	phosphorus-oxygen lyase activity	molecular_function	0.12751	1	2	707	23	25884
GO:0005849	mRNA cleavage factor complex	cellular_component	0.12767	1	1	707	6	25884
GO:0006378	mRNA polyadenylation	biological_process	0.12767	1	1	707	6	25884
GO:0040011	locomotion	biological_process	0.12793	1	9	707	213	25884
GO:0030258	lipid modification	biological_process	0.12915	1	4	707	68	25884
GO:0022610	biological adhesion	biological_process	0.12922	1	7	707	150	25884
GO:0009245	lipid A biosynthetic process	biological_process	0.13015	1	2	707	23	25884
GO:0046493	lipid A metabolic process	biological_process	0.13015	1	2	707	23	25884
GO:1901269	lipooligosaccharide metabolic process	biological_process	0.13015	1	2	707	23	25884
GO:1901271	lipooligosaccharide biosynthetic process	biological_process	0.13015	1	2	707	23	25884
GO:0003995	acyl-CoA dehydrogenase activity	molecular_function	0.13032	1	2	707	21	25884
GO:0007289	spermatid nucleus differentiation	biological_process	0.13064	1	1	707	6	25884
GO:0035092	sperm chromatin condensation	biological_process	0.13064	1	1	707	6	25884
GO:0005509	calcium ion binding	molecular_function	0.13174	1	15	707	408	25884
GO:0046849	bone remodeling	biological_process	0.13223	1	1	707	5	25884
GO:0048771	tissue remodeling	biological_process	0.13223	1	1	707	5	25884
GO:0033647	host intracellular organelle	cellular_component	0.13244	1	4	707	71	25884
GO:0033648	host intracellular membrane-bounded organelle	cellular_component	0.13244	1	4	707	71	25884
GO:1902533	positive regulation of intracellular signal transduction	biological_process	0.13274	1	2	707	22	25884
GO:0000921	septin ring assembly	biological_process	0.13326	1	2	707	22	25884
GO:0005940	septin ring	cellular_component	0.13326	1	2	707	22	25884
GO:0031106	septin ring organization	biological_process	0.13326	1	2	707	22	25884
GO:0032156	septin cytoskeleton	cellular_component	0.13326	1	2	707	22	25884
GO:0032185	septin cytoskeleton organization	biological_process	0.13326	1	2	707	22	25884
GO:0005215	transporter activity	molecular_function	0.13493	1	64	707	1990	25884
GO:0098609	cell-cell adhesion	biological_process	0.13793	1	1	707	5	25884
GO:0005618	cell wall	cellular_component	0.13854	1	7	707	155	25884
GO:0005789	endoplasmic reticulum membrane	cellular_component	0.13937	1	9	707	216	25884
GO:0008484	sulfuric ester hydrolase activity	molecular_function	0.14013	1	1	707	5	25884
GO:0008115	sarcosine oxidase activity	molecular_function	0.14075	1	1	707	5	25884
GO:0016647	oxidoreductase activity, acting on the CH-NH group of donors, oxygen as acceptor	molecular_function	0.14075	1	1	707	5	25884
GO:0046653	tetrahydrofolate metabolic process	biological_process	0.14075	1	1	707	5	25884
GO:0033692	cellular polysaccharide biosynthetic process	biological_process	0.14137	1	5	707	94	25884
GO:0031347	regulation of defense response	biological_process	0.14229	1	2	707	25	25884
GO:0001871	pattern binding	molecular_function	0.14309	1	6	707	122	25884
GO:0030247	polysaccharide binding	molecular_function	0.14309	1	6	707	122	25884
GO:0003883	CTP synthase activity	molecular_function	0.14312	1	1	707	5	25884
GO:0050776	regulation of immune response	biological_process	0.14318	1	2	707	26	25884
GO:1901618	organic hydroxy compound transmembrane transporter activity	molecular_function	0.14361	1	1	707	5	25884
GO:0004719	protein-L-isoaspartate (D-aspartate) O-methyltransferase activity	molecular_function	0.14381	1	3	707	47	25884
GO:0016298	lipase activity	molecular_function	0.14442	1	3	707	46	25884
GO:0003840	gamma-glutamyltransferase activity	molecular_function	0.14473	1	1	707	6	25884
GO:0050497	transferase activity, transferring alkylthio groups	molecular_function	0.14622	1	1	707	6	25884
GO:0050524	coenzyme-B sulfoethylthiotransferase activity	molecular_function	0.14622	1	1	707	6	25884
GO:0016787	hydrolase activity	molecular_function	0.14807	1	146	707	4804	25884
GO:0009847	spore germination	biological_process	0.15153	1	2	707	25	25884
GO:0034645	cellular macromolecule biosynthetic process	biological_process	0.15251	1	123	707	4177	25884
GO:0001883	purine nucleoside binding	molecular_function	0.15346	1	122	707	3835	25884
GO:0032549	ribonucleoside binding	molecular_function	0.15346	1	122	707	3835	25884
GO:0032550	purine ribonucleoside binding	molecular_function	0.15346	1	122	707	3835	25884
GO:0032559	adenyl ribonucleotide binding	molecular_function	0.15355	1	115	707	3591	25884
GO:0098588	bounding membrane of organelle	cellular_component	0.15386	1	20	707	560	25884
GO:0000166	nucleotide binding	molecular_function	0.15389	1	142	707	4516	25884
GO:1901265	nucleoside phosphate binding	molecular_function	0.15389	1	142	707	4516	25884
GO:0008685	2-C-methyl-D-erythritol 2,4-cyclodiphosphate synthase activity	molecular_function	0.15526	1	1	707	6	25884
GO:0000154	rRNA modification	biological_process	0.15576	1	2	707	25	25884
GO:0031167	rRNA methylation	biological_process	0.15576	1	2	707	25	25884
GO:0044271	cellular nitrogen compound biosynthetic process	biological_process	0.15587	1	123	707	4197	25884
GO:1901565	organonitrogen compound catabolic process	biological_process	0.15651	1	6	707	135	25884
GO:0032555	purine ribonucleotide binding	molecular_function	0.15708	1	122	707	3840	25884
GO:0042175	nuclear outer membrane-endoplasmic reticulum membrane network	cellular_component	0.15787	1	9	707	222	25884
GO:0001882	nucleoside binding	molecular_function	0.15845	1	122	707	3843	25884
GO:0005179	hormone activity	molecular_function	0.15889	1	6	707	129	25884
GO:0000302	response to reactive oxygen species	biological_process	0.15896	1	1	707	7	25884
GO:1901031	regulation of response to reactive oxygen species	biological_process	0.15896	1	1	707	7	25884
GO:1902882	regulation of response to oxidative stress	biological_process	0.15896	1	1	707	7	25884
GO:0009166	nucleotide catabolic process	biological_process	0.15972	1	1	707	6	25884
GO:1901292	nucleoside phosphate catabolic process	biological_process	0.15972	1	1	707	6	25884
GO:0016616	oxidoreductase activity, acting on the CH-OH group of donors, NAD or NADP as acceptor	molecular_function	0.16094	1	15	707	403	25884
GO:0006505	GPI anchor metabolic process	biological_process	0.16323	1	6	707	132	25884
GO:0035299	inositol pentakisphosphate 2-kinase activity	molecular_function	0.16441	1	1	707	6	25884
GO:0016070	RNA metabolic process	biological_process	0.16461	1	111	707	3678	25884
GO:0004190	aspartic-type endopeptidase activity	molecular_function	0.16478	1	8	707	194	25884
GO:0070001	aspartic-type peptidase activity	molecular_function	0.16478	1	8	707	194	25884
GO:0004659	prenyltransferase activity	molecular_function	0.16605	1	3	707	50	25884
GO:0007591	molting cycle, chitin-based cuticle	biological_process	0.16631	1	1	707	6	25884
GO:0008255	ecdysis-triggering hormone activity	molecular_function	0.16631	1	1	707	6	25884
GO:0018990	ecdysis, chitin-based cuticle	biological_process	0.16631	1	1	707	6	25884
GO:0022404	molting cycle process	biological_process	0.16631	1	1	707	6	25884
GO:0042303	molting cycle	biological_process	0.16631	1	1	707	6	25884
GO:0006811	ion transport	biological_process	0.16645	1	45	707	1410	25884
GO:0016667	oxidoreductase activity, acting on a sulfur group of donors	molecular_function	0.16661	1	6	707	149	25884
GO:0097367	carbohydrate derivative binding	molecular_function	0.16734	1	124	707	3930	25884
GO:0009059	macromolecule biosynthetic process	biological_process	0.16915	1	124	707	4235	25884
GO:0070588	calcium ion transmembrane transport	biological_process	0.16958	1	1	707	6	25884
GO:0005794	Golgi apparatus	cellular_component	0.1699	1	6	707	131	25884
GO:0033643	host cell part	cellular_component	0.1705	1	5	707	105	25884
GO:0044432	endoplasmic reticulum part	cellular_component	0.17062	1	9	707	227	25884
GO:0048040	UDP-glucuronate decarboxylase activity	molecular_function	0.1712	1	1	707	7	25884
GO:0019031	viral envelope	cellular_component	0.17251	1	9	707	224	25884
GO:0036338	viral membrane	cellular_component	0.17251	1	9	707	224	25884
GO:0032266	phosphatidylinositol-3-phosphate binding	molecular_function	0.17293	1	1	707	7	25884
GO:0005262	calcium channel activity	molecular_function	0.176	1	2	707	30	25884
GO:0016614	oxidoreductase activity, acting on CH-OH group of donors	molecular_function	0.17693	1	16	707	441	25884
GO:0006812	cation transport	biological_process	0.1773	1	34	707	1053	25884
GO:0006366	transcription from RNA polymerase II promoter	biological_process	0.17859	1	8	707	200	25884
GO:0016831	carboxy-lyase activity	molecular_function	0.18001	1	6	707	135	25884
GO:0009029	tetraacyldisaccharide 4'-kinase activity	molecular_function	0.18011	1	1	707	7	25884
GO:0018995	host	cellular_component	0.1804	1	5	707	107	25884
GO:0043657	host cell	cellular_component	0.1804	1	5	707	107	25884
GO:0044215	other organism	cellular_component	0.1804	1	5	707	107	25884
GO:0044216	other organism cell	cellular_component	0.1804	1	5	707	107	25884
GO:0044217	other organism part	cellular_component	0.1804	1	5	707	107	25884
GO:0009427	bacterial-type flagellum basal body, distal rod, L ring	cellular_component	0.18088	1	1	707	8	25884
GO:0030554	adenyl nucleotide binding	molecular_function	0.18166	1	115	707	3628	25884
GO:0032553	ribonucleotide binding	molecular_function	0.18291	1	122	707	3877	25884
GO:0043207	response to external biotic stimulus	biological_process	0.18432	1	7	707	173	25884
GO:0051707	response to other organism	biological_process	0.18432	1	7	707	173	25884
GO:0000149	SNARE binding	molecular_function	0.18433	1	1	707	8	25884
GO:0019905	syntaxin binding	molecular_function	0.18433	1	1	707	8	25884
GO:0034637	cellular carbohydrate biosynthetic process	biological_process	0.18444	1	6	707	131	25884
GO:0004421	hydroxymethylglutaryl-CoA synthase activity	molecular_function	0.18449	1	1	707	7	25884
GO:0015085	calcium ion transmembrane transporter activity	molecular_function	0.18704	1	2	707	31	25884
GO:1902495	transmembrane transporter complex	cellular_component	0.18731	1	2	707	30	25884
GO:1990351	transporter complex	cellular_component	0.18731	1	2	707	30	25884
GO:0010827	regulation of glucose transport	biological_process	0.18768	1	1	707	7	25884
GO:0010829	negative regulation of glucose transport	biological_process	0.18768	1	1	707	7	25884
GO:0015758	glucose transport	biological_process	0.18768	1	1	707	7	25884
GO:0046323	glucose import	biological_process	0.18768	1	1	707	7	25884
GO:0046324	regulation of glucose import	biological_process	0.18768	1	1	707	7	25884
GO:0046325	negative regulation of glucose import	biological_process	0.18768	1	1	707	7	25884
GO:0006515	misfolded or incompletely synthesized protein catabolic process	biological_process	0.18781	1	1	707	7	25884
GO:0031144	proteasome localization	biological_process	0.18781	1	1	707	7	25884
GO:0031503	protein complex localization	biological_process	0.18781	1	1	707	7	25884
GO:0034629	cellular protein complex localization	biological_process	0.18781	1	1	707	7	25884
GO:0035966	response to topologically incorrect protein	biological_process	0.18781	1	1	707	7	25884
GO:0035967	cellular response to topologically incorrect protein	biological_process	0.18781	1	1	707	7	25884
GO:0051788	response to misfolded protein	biological_process	0.18781	1	1	707	7	25884
GO:0071218	cellular response to misfolded protein	biological_process	0.18781	1	1	707	7	25884
GO:0071630	nucleus-associated proteasomal ubiquitin-dependent protein catabolic process	biological_process	0.18781	1	1	707	7	25884
GO:0036094	small molecule binding	molecular_function	0.18869	1	144	707	4637	25884
GO:0017076	purine nucleotide binding	molecular_function	0.18912	1	122	707	3882	25884
GO:0009967	positive regulation of signal transduction	biological_process	0.18936	1	2	707	28	25884
GO:0010647	positive regulation of cell communication	biological_process	0.18936	1	2	707	28	25884
GO:0023056	positive regulation of signaling	biological_process	0.18936	1	2	707	28	25884
GO:0000271	polysaccharide biosynthetic process	biological_process	0.18989	1	5	707	105	25884
GO:0016788	hydrolase activity, acting on ester bonds	molecular_function	0.19068	1	41	707	1285	25884
GO:0004420	hydroxymethylglutaryl-CoA reductase (NADPH) activity	molecular_function	0.19384	1	1	707	7	25884
GO:0019064	fusion of virus membrane with host plasma membrane	biological_process	0.19648	1	2	707	28	25884
GO:0039663	membrane fusion involved in viral entry into host cell	biological_process	0.19648	1	2	707	28	25884
GO:0044800	multi-organism membrane fusion	biological_process	0.19648	1	2	707	28	25884
GO:0044803	multi-organism membrane organization	biological_process	0.19648	1	2	707	28	25884
GO:0050518	2-C-methyl-D-erythritol 4-phosphate cytidylyltransferase activity	molecular_function	0.1968	1	1	707	8	25884
GO:0016705	oxidoreductase activity, acting on paired donors, with incorporation or reduction of molecular oxygen	molecular_function	0.19806	1	19	707	539	25884
GO:0006629	lipid metabolic process	biological_process	0.19807	1	36	707	1106	25884
GO:0005092	GDP-dissociation inhibitor activity	molecular_function	0.19845	1	1	707	8	25884
GO:0005094	Rho GDP-dissociation inhibitor activity	molecular_function	0.19845	1	1	707	8	25884
GO:0015159	polysaccharide transmembrane transporter activity	molecular_function	0.19922	1	1	707	10	25884
GO:0015774	polysaccharide transport	biological_process	0.19922	1	1	707	10	25884
GO:0033037	polysaccharide localization	biological_process	0.19922	1	1	707	10	25884
GO:0004564	beta-fructofuranosidase activity	molecular_function	0.19927	1	1	707	8	25884
GO:0004575	sucrose alpha-glucosidase activity	molecular_function	0.19927	1	1	707	8	25884
GO:0090599	alpha-glucosidase activity	molecular_function	0.19927	1	1	707	8	25884
GO:0043044	ATP-dependent chromatin remodeling	biological_process	0.1993	1	1	707	8	25884
GO:0005506	iron ion binding	molecular_function	0.19995	1	17	707	486	25884
GO:0043085	positive regulation of catalytic activity	biological_process	0.20234	1	2	707	31	25884
GO:0008121	ubiquinol-cytochrome-c reductase activity	molecular_function	0.20329	1	2	707	32	25884
GO:0016681	oxidoreductase activity, acting on diphenols and related substances as donors, cytochrome as acceptor	molecular_function	0.20329	1	2	707	32	25884
GO:0050840	extracellular matrix binding	molecular_function	0.20565	1	1	707	10	25884
GO:0009426	bacterial-type flagellum basal body, distal rod	cellular_component	0.2059	1	1	707	9	25884
GO:0016765	transferase activity, transferring alkyl or aryl (other than methyl) groups	molecular_function	0.20687	1	5	707	114	25884
GO:0004675	transmembrane receptor protein serine/threonine kinase activity	molecular_function	0.2071	1	1	707	8	25884
GO:0008171	O-methyltransferase activity	molecular_function	0.20768	1	5	707	116	25884
GO:0000313	organellar ribosome	cellular_component	0.20815	1	1	707	9	25884
GO:0005761	mitochondrial ribosome	cellular_component	0.20815	1	1	707	9	25884
GO:0031505	fungal-type cell wall organization	biological_process	0.21011	1	1	707	8	25884
GO:0071852	fungal-type cell wall organization or biogenesis	biological_process	0.21011	1	1	707	8	25884
GO:0003918	DNA topoisomerase type II (ATP-hydrolyzing) activity	molecular_function	0.21025	1	2	707	29	25884
GO:0061505	DNA topoisomerase II activity	molecular_function	0.21025	1	2	707	29	25884
GO:0005984	disaccharide metabolic process	biological_process	0.21204	1	3	707	54	25884
GO:0051051	negative regulation of transport	biological_process	0.21248	1	1	707	8	25884
GO:0030545	receptor regulator activity	molecular_function	0.21314	1	1	707	8	25884
GO:0030547	receptor inhibitor activity	molecular_function	0.21314	1	1	707	8	25884
GO:0030548	acetylcholine receptor regulator activity	molecular_function	0.21314	1	1	707	8	25884
GO:0030550	acetylcholine receptor inhibitor activity	molecular_function	0.21314	1	1	707	8	25884
GO:0019012	virion	cellular_component	0.21525	1	18	707	528	25884
GO:0042995	cell projection	cellular_component	0.21597	1	5	707	117	25884
GO:0044260	cellular macromolecule metabolic process	biological_process	0.21745	1	230	707	7961	25884
GO:0019385	methanogenesis, from acetate	biological_process	0.21858	1	1	707	8	25884
GO:0030260	entry into host cell	biological_process	0.21866	1	2	707	30	25884
GO:0044409	entry into host	biological_process	0.21866	1	2	707	30	25884
GO:0046718	viral entry into host cell	biological_process	0.21866	1	2	707	30	25884
GO:0051806	entry into cell of other organism involved in symbiotic interaction	biological_process	0.21866	1	2	707	30	25884
GO:0051828	entry into other organism involved in symbiotic interaction	biological_process	0.21866	1	2	707	30	25884
GO:0016209	antioxidant activity	molecular_function	0.21906	1	8	707	220	25884
GO:0043531	ADP binding	molecular_function	0.21958	1	13	707	343	25884
GO:0030246	carbohydrate binding	molecular_function	0.2204	1	10	707	257	25884
GO:0046556	alpha-L-arabinofuranosidase activity	molecular_function	0.22254	1	1	707	9	25884
GO:0003674	molecular_function	molecular_function	0.22369	1	634	707	22810	25884
GO:0044255	cellular lipid metabolic process	biological_process	0.22736	1	22	707	653	25884
GO:0003746	translation elongation factor activity	molecular_function	0.22766	1	2	707	33	25884
GO:0051345	positive regulation of hydrolase activity	biological_process	0.22812	1	1	707	10	25884
GO:0034464	BBSome	cellular_component	0.22829	1	1	707	9	25884
GO:0004383	guanylate cyclase activity	molecular_function	0.22933	1	1	707	10	25884
GO:0006182	cGMP biosynthetic process	biological_process	0.22933	1	1	707	10	25884
GO:0046068	cGMP metabolic process	biological_process	0.22933	1	1	707	10	25884
GO:0006836	neurotransmitter transport	biological_process	0.23036	1	1	707	9	25884
GO:0018144	RNA-protein covalent cross-linking	biological_process	0.23055	1	1	707	9	25884
GO:0045095	keratin filament	cellular_component	0.23057	1	1	707	9	25884
GO:0007286	spermatid development	biological_process	0.231	1	1	707	10	25884
GO:0048515	spermatid differentiation	biological_process	0.231	1	1	707	10	25884
GO:0006206	pyrimidine nucleobase metabolic process	biological_process	0.23355	1	1	707	10	25884
GO:0019856	pyrimidine nucleobase biosynthetic process	biological_process	0.23355	1	1	707	10	25884
GO:0030865	cortical cytoskeleton organization	biological_process	0.23361	1	1	707	9	25884
GO:0030866	cortical actin cytoskeleton organization	biological_process	0.23361	1	1	707	9	25884
GO:0016709	oxidoreductase activity, acting on paired donors, with incorporation or reduction of molecular oxygen, NAD(P)H as one donor, and incorporation of one atom of oxygen	molecular_function	0.2338	1	3	707	58	25884
GO:0030430	host cell cytoplasm	cellular_component	0.23445	1	1	707	9	25884
GO:0043087	regulation of GTPase activity	biological_process	0.23459	1	1	707	9	25884
GO:0008645	hexose transport	biological_process	0.23584	1	1	707	9	25884
GO:0003678	DNA helicase activity	molecular_function	0.23661	1	11	707	292	25884
GO:0032990	cell part morphogenesis	biological_process	0.23737	1	2	707	33	25884
GO:0048858	cell projection morphogenesis	biological_process	0.23737	1	2	707	33	25884
GO:0051015	actin filament binding	molecular_function	0.23758	1	1	707	9	25884
GO:0006810	transport	biological_process	0.23789	1	115	707	3868	25884
GO:0007610	behavior	biological_process	0.23934	1	2	707	34	25884
GO:0051213	dioxygenase activity	molecular_function	0.23956	1	4	707	92	25884
GO:0003824	catalytic activity	molecular_function	0.24004	1	373	707	12972	25884
GO:0061025	membrane fusion	biological_process	0.24107	1	3	707	61	25884
GO:0009307	DNA restriction-modification system	biological_process	0.24112	1	2	707	33	25884
GO:0044355	clearance of foreign intracellular DNA	biological_process	0.24112	1	2	707	33	25884
GO:0019901	protein kinase binding	molecular_function	0.24125	1	2	707	34	25884
GO:0000270	peptidoglycan metabolic process	biological_process	0.2414	1	1	707	10	25884
GO:0015850	organic hydroxy compound transport	biological_process	0.24228	1	1	707	10	25884
GO:0005543	phospholipid binding	molecular_function	0.24352	1	4	707	89	25884
GO:0009036	Type II site-specific deoxyribonuclease activity	molecular_function	0.2436	1	2	707	33	25884
GO:0015666	restriction endodeoxyribonuclease activity	molecular_function	0.2436	1	2	707	33	25884
GO:0016593	Cdc73/Paf1 complex	cellular_component	0.24418	1	1	707	12	25884
GO:0044093	positive regulation of molecular function	biological_process	0.24446	1	2	707	35	25884
GO:0004089	carbonate dehydratase activity	molecular_function	0.24486	1	1	707	11	25884
GO:0044380	protein localization to cytoskeleton	biological_process	0.24523	1	1	707	10	25884
GO:0071988	protein localization to spindle pole body	biological_process	0.24523	1	1	707	10	25884
GO:0072698	protein localization to microtubule cytoskeleton	biological_process	0.24523	1	1	707	10	25884
GO:0004045	aminoacyl-tRNA hydrolase activity	molecular_function	0.24665	1	1	707	11	25884
GO:0046488	phosphatidylinositol metabolic process	biological_process	0.24877	1	7	707	181	25884
GO:0019722	calcium-mediated signaling	biological_process	0.25055	1	1	707	10	25884
GO:0019932	second-messenger-mediated signaling	biological_process	0.25055	1	1	707	10	25884
GO:0052652	cyclic purine nucleotide metabolic process	biological_process	0.25187	1	1	707	11	25884
GO:0044431	Golgi apparatus part	cellular_component	0.25199	1	5	707	119	25884
GO:0003880	protein C-terminal carboxyl O-methyltransferase activity	molecular_function	0.25414	1	1	707	11	25884
GO:0004671	protein C-terminal S-isoprenylcysteine carboxyl O-methyltransferase activity	molecular_function	0.25414	1	1	707	11	25884
GO:0006481	C-terminal protein methylation	biological_process	0.25414	1	1	707	11	25884
GO:0018410	C-terminal protein amino acid modification	biological_process	0.25414	1	1	707	11	25884
GO:0043687	post-translational protein modification	biological_process	0.25414	1	1	707	11	25884
GO:0016021	integral component of membrane	cellular_component	0.25418	1	89	707	2992	25884
GO:0044262	cellular carbohydrate metabolic process	biological_process	0.25436	1	8	707	212	25884
GO:0031224	intrinsic component of membrane	cellular_component	0.25449	1	90	707	3026	25884
GO:0004185	serine-type carboxypeptidase activity	molecular_function	0.25489	1	3	707	61	25884
GO:0031072	heat shock protein binding	molecular_function	0.2558	1	2	707	40	25884
GO:0009112	nucleobase metabolic process	biological_process	0.25664	1	1	707	11	25884
GO:0046112	nucleobase biosynthetic process	biological_process	0.25664	1	1	707	11	25884
GO:0005173	stem cell factor receptor binding	molecular_function	0.25671	1	1	707	10	25884
GO:0055085	transmembrane transport	biological_process	0.25708	1	43	707	1358	25884
GO:0051179	localization	biological_process	0.25825	1	118	707	3995	25884
GO:1901981	phosphatidylinositol phosphate binding	molecular_function	0.25913	1	1	707	11	25884
GO:0005654	nucleoplasm	cellular_component	0.25963	1	9	707	257	25884
GO:0044451	nucleoplasm part	cellular_component	0.25963	1	9	707	257	25884
GO:0004556	alpha-amylase activity	molecular_function	0.26219	1	1	707	10	25884
GO:0006414	translational elongation	biological_process	0.26282	1	2	707	37	25884
GO:0000165	MAPK cascade	biological_process	0.26289	1	1	707	10	25884
GO:0023014	signal transduction by protein phosphorylation	biological_process	0.26289	1	1	707	10	25884
GO:0043408	regulation of MAPK cascade	biological_process	0.26289	1	1	707	10	25884
GO:0043410	positive regulation of MAPK cascade	biological_process	0.26289	1	1	707	10	25884
GO:0009617	response to bacterium	biological_process	0.26291	1	4	707	96	25884
GO:0042742	defense response to bacterium	biological_process	0.26291	1	4	707	96	25884
GO:0051234	establishment of localization	biological_process	0.26446	1	115	707	3897	25884
GO:0007283	spermatogenesis	biological_process	0.26637	1	2	707	35	25884
GO:0048232	male gamete generation	biological_process	0.26637	1	2	707	35	25884
GO:0000723	telomere maintenance	biological_process	0.2664	1	2	707	36	25884
GO:0032200	telomere organization	biological_process	0.2664	1	2	707	36	25884
GO:0060249	anatomical structure homeostasis	biological_process	0.2664	1	2	707	36	25884
GO:0098797	plasma membrane protein complex	cellular_component	0.26643	1	4	707	96	25884
GO:0000988	transcription factor activity, protein binding	molecular_function	0.26725	1	8	707	222	25884
GO:0044765	single-organism transport	biological_process	0.2673	1	84	707	2812	25884
GO:0004478	methionine adenosyltransferase activity	molecular_function	0.26767	1	1	707	11	25884
GO:0006556	S-adenosylmethionine biosynthetic process	biological_process	0.26767	1	1	707	11	25884
GO:0046500	S-adenosylmethionine metabolic process	biological_process	0.26767	1	1	707	11	25884
GO:0019199	transmembrane receptor protein kinase activity	molecular_function	0.26848	1	1	707	11	25884
GO:0030410	nicotianamine synthase activity	molecular_function	0.26859	1	1	707	12	25884
GO:0030417	nicotianamine metabolic process	biological_process	0.26859	1	1	707	12	25884
GO:0030418	nicotianamine biosynthetic process	biological_process	0.26859	1	1	707	12	25884
GO:0072351	tricarboxylic acid biosynthetic process	biological_process	0.26859	1	1	707	12	25884
GO:0008094	DNA-dependent ATPase activity	molecular_function	0.26889	1	3	707	62	25884
GO:0009289	pilus	cellular_component	0.26998	1	1	707	11	25884
GO:0018143	nucleic acid-protein covalent cross-linking	biological_process	0.27025	1	1	707	11	25884
GO:0070925	organelle assembly	biological_process	0.27039	1	5	707	130	25884
GO:0000726	non-recombinational repair	biological_process	0.271	1	1	707	12	25884
GO:0010927	cellular component assembly involved in morphogenesis	biological_process	0.27109	1	1	707	11	25884
GO:0042384	cilium assembly	biological_process	0.27109	1	1	707	11	25884
GO:0060271	cilium morphogenesis	biological_process	0.27109	1	1	707	11	25884
GO:0006575	cellular modified amino acid metabolic process	biological_process	0.2712	1	4	707	95	25884
GO:0046131	pyrimidine ribonucleoside metabolic process	biological_process	0.27122	1	1	707	13	25884
GO:0033202	DNA helicase complex	cellular_component	0.27185	1	1	707	11	25884
GO:0003885	D-arabinono-1,4-lactone oxidase activity	molecular_function	0.27196	1	1	707	11	25884
GO:0016899	oxidoreductase activity, acting on the CH-OH group of donors, oxygen as acceptor	molecular_function	0.27196	1	1	707	11	25884
GO:0009190	cyclic nucleotide biosynthetic process	biological_process	0.27244	1	1	707	12	25884
GO:0048584	positive regulation of response to stimulus	biological_process	0.27361	1	2	707	36	25884
GO:0000160	phosphorelay signal transduction system	biological_process	0.27371	1	5	707	129	25884
GO:0006997	nucleus organization	biological_process	0.27428	1	1	707	12	25884
GO:0007267	cell-cell signaling	biological_process	0.27561	1	1	707	11	25884
GO:0007268	synaptic transmission	biological_process	0.27561	1	1	707	11	25884
GO:0016645	oxidoreductase activity, acting on the CH-NH group of donors	molecular_function	0.27585	1	3	707	65	25884
GO:0019239	deaminase activity	molecular_function	0.27596	1	1	707	11	25884
GO:0005785	signal recognition particle receptor complex	cellular_component	0.27653	1	1	707	12	25884
GO:0004869	cysteine-type endopeptidase inhibitor activity	molecular_function	0.27791	1	1	707	15	25884
GO:0032102	negative regulation of response to external stimulus	biological_process	0.2788	1	1	707	11	25884
GO:0009378	four-way junction helicase activity	molecular_function	0.27922	1	8	707	210	25884
GO:0070567	cytidylyltransferase activity	molecular_function	0.27929	1	1	707	12	25884
GO:0015749	monosaccharide transport	biological_process	0.28009	1	1	707	11	25884
GO:0007631	feeding behavior	biological_process	0.2802	1	1	707	11	25884
GO:0004497	monooxygenase activity	molecular_function	0.28254	1	4	707	93	25884
GO:0006979	response to oxidative stress	biological_process	0.28255	1	5	707	139	25884
GO:0006650	glycerophospholipid metabolic process	biological_process	0.28576	1	7	707	189	25884
GO:0000155	phosphorelay sensor kinase activity	molecular_function	0.28597	1	3	707	64	25884
GO:0044423	virion part	cellular_component	0.28721	1	16	707	490	25884
GO:0004143	diacylglycerol kinase activity	molecular_function	0.28915	1	1	707	12	25884
GO:0043066	negative regulation of apoptotic process	biological_process	0.28931	1	1	707	12	25884
GO:0043069	negative regulation of programmed cell death	biological_process	0.28931	1	1	707	12	25884
GO:0060548	negative regulation of cell death	biological_process	0.28931	1	1	707	12	25884
GO:0006073	cellular glucan metabolic process	biological_process	0.28947	1	5	707	128	25884
GO:0044042	glucan metabolic process	biological_process	0.28947	1	5	707	128	25884
GO:0003779	actin binding	molecular_function	0.28994	1	8	707	223	25884
GO:0016701	oxidoreductase activity, acting on single donors with incorporation of molecular oxygen	molecular_function	0.29047	1	4	707	98	25884
GO:0006672	ceramide metabolic process	biological_process	0.29099	1	1	707	12	25884
GO:0005777	peroxisome	cellular_component	0.29354	1	2	707	38	25884
GO:0042579	microbody	cellular_component	0.29354	1	2	707	38	25884
GO:0004180	carboxypeptidase activity	molecular_function	0.29443	1	3	707	66	25884
GO:0019068	virion assembly	biological_process	0.29497	1	2	707	40	25884
GO:0000075	cell cycle checkpoint	biological_process	0.29569	1	2	707	40	25884
GO:0009341	beta-galactosidase complex	cellular_component	0.29596	1	2	707	36	25884
GO:0004616	phosphogluconate dehydrogenase (decarboxylating) activity	molecular_function	0.297	1	3	707	67	25884
GO:0004252	serine-type endopeptidase activity	molecular_function	0.29894	1	8	707	217	25884
GO:0042578	phosphoric ester hydrolase activity	molecular_function	0.30209	1	12	707	354	25884
GO:0031300	intrinsic component of organelle membrane	cellular_component	0.30281	1	4	707	99	25884
GO:0031301	integral component of organelle membrane	cellular_component	0.30281	1	4	707	99	25884
GO:0030284	estrogen receptor activity	molecular_function	0.30434	1	1	707	12	25884
GO:0048583	regulation of response to stimulus	biological_process	0.30461	1	5	707	132	25884
GO:0055082	cellular chemical homeostasis	biological_process	0.30497	1	2	707	43	25884
GO:0010467	gene expression	biological_process	0.30521	1	125	707	4429	25884
GO:0044782	cilium organization	biological_process	0.30715	1	1	707	13	25884
GO:0006334	nucleosome assembly	biological_process	0.3072	1	2	707	42	25884
GO:0031497	chromatin assembly	biological_process	0.3072	1	2	707	42	25884
GO:0034728	nucleosome organization	biological_process	0.3072	1	2	707	42	25884
GO:0009247	glycolipid biosynthetic process	biological_process	0.30733	1	4	707	100	25884
GO:0046467	membrane lipid biosynthetic process	biological_process	0.30733	1	4	707	100	25884
GO:0071310	cellular response to organic substance	biological_process	0.30746	1	2	707	38	25884
GO:1902531	regulation of intracellular signal transduction	biological_process	0.30809	1	2	707	38	25884
GO:0006749	glutathione metabolic process	biological_process	0.30909	1	1	707	13	25884
GO:0004499	N,N-dimethylaniline monooxygenase activity	molecular_function	0.31014	1	2	707	39	25884
GO:0030694	bacterial-type flagellum basal body, rod	cellular_component	0.31037	1	1	707	14	25884
GO:0015934	large ribosomal subunit	cellular_component	0.31173	1	1	707	15	25884
GO:0003712	transcription cofactor activity	molecular_function	0.31268	1	6	707	168	25884
GO:0031683	G-protein beta/gamma-subunit complex binding	molecular_function	0.31302	1	4	707	103	25884
GO:0044267	cellular protein metabolic process	biological_process	0.31564	1	110	707	3794	25884
GO:0000989	transcription factor activity, transcription factor binding	molecular_function	0.31663	1	6	707	170	25884
GO:0006760	folic acid-containing compound metabolic process	biological_process	0.31679	1	2	707	41	25884
GO:0019028	viral capsid	cellular_component	0.31718	1	9	707	268	25884
GO:0022804	active transmembrane transporter activity	molecular_function	0.31869	1	13	707	386	25884
GO:0015291	secondary active transmembrane transporter activity	molecular_function	0.31881	1	7	707	193	25884
GO:0008194	UDP-glycosyltransferase activity	molecular_function	0.31918	1	7	707	193	25884
GO:0000148	1,3-beta-D-glucan synthase complex	cellular_component	0.31936	1	1	707	13	25884
GO:0003843	1,3-beta-D-glucan synthase activity	molecular_function	0.31936	1	1	707	13	25884
GO:0006074	(1->3)-beta-D-glucan metabolic process	biological_process	0.31936	1	1	707	13	25884
GO:0006075	(1->3)-beta-D-glucan biosynthetic process	biological_process	0.31936	1	1	707	13	25884
GO:0071103	DNA conformation change	biological_process	0.32009	1	5	707	135	25884
GO:0004470	malic enzyme activity	molecular_function	0.32056	1	1	707	13	25884
GO:0004471	malate dehydrogenase (decarboxylating) (NAD+) activity	molecular_function	0.32056	1	1	707	13	25884
GO:0016615	malate dehydrogenase activity	molecular_function	0.32056	1	1	707	13	25884
GO:0034508	centromere complex assembly	biological_process	0.3212	1	3	707	73	25884
GO:0043168	anion binding	molecular_function	0.32336	1	136	707	4512	25884
GO:0008915	lipid-A-disaccharide synthase activity	molecular_function	0.3242	1	1	707	14	25884
GO:0060429	epithelium development	biological_process	0.32479	1	2	707	42	25884
GO:0002682	regulation of immune system process	biological_process	0.32587	1	2	707	43	25884
GO:0015926	glucosidase activity	molecular_function	0.32715	1	1	707	14	25884
GO:0009605	response to external stimulus	biological_process	0.32741	1	9	707	277	25884
GO:0044700	single organism signaling	biological_process	0.33009	1	41	707	1387	25884
GO:0009267	cellular response to starvation	biological_process	0.33066	1	1	707	18	25884
GO:0031667	response to nutrient levels	biological_process	0.33066	1	1	707	18	25884
GO:0031669	cellular response to nutrient levels	biological_process	0.33066	1	1	707	18	25884
GO:0042594	response to starvation	biological_process	0.33066	1	1	707	18	25884
GO:0009425	bacterial-type flagellum basal body	cellular_component	0.33122	1	1	707	15	25884
GO:0005310	dicarboxylic acid transmembrane transporter activity	molecular_function	0.33179	1	1	707	14	25884
GO:0023052	signaling	biological_process	0.33193	1	41	707	1388	25884
GO:0033554	cellular response to stress	biological_process	0.33219	1	20	707	637	25884
GO:1902578	single-organism localization	biological_process	0.33239	1	84	707	2869	25884
GO:0046434	organophosphate catabolic process	biological_process	0.33294	1	2	707	42	25884
GO:0044249	cellular biosynthetic process	biological_process	0.33303	1	149	707	5305	25884
GO:0030029	actin filament-based process	biological_process	0.3336	1	3	707	73	25884
GO:0030036	actin cytoskeleton organization	biological_process	0.3336	1	3	707	73	25884
GO:0032505	reproduction of a single-celled organism	biological_process	0.33421	1	4	707	109	25884
GO:0046486	glycerolipid metabolic process	biological_process	0.3356	1	7	707	200	25884
GO:0042301	phosphate ion binding	molecular_function	0.33624	1	1	707	15	25884
GO:0006576	cellular biogenic amine metabolic process	biological_process	0.33654	1	4	707	108	25884
GO:0044106	cellular amine metabolic process	biological_process	0.33654	1	4	707	108	25884
GO:0019900	kinase binding	molecular_function	0.33839	1	2	707	43	25884
GO:0009288	bacterial-type flagellum	cellular_component	0.33926	1	2	707	45	25884
GO:0008135	translation factor activity, RNA binding	molecular_function	0.3404	1	5	707	146	25884
GO:0009832	plant-type cell wall biogenesis	biological_process	0.34066	1	1	707	14	25884
GO:0010215	cellulose microfibril organization	biological_process	0.34066	1	1	707	14	25884
GO:0070726	cell wall assembly	biological_process	0.34066	1	1	707	14	25884
GO:0071668	plant-type cell wall assembly	biological_process	0.34066	1	1	707	14	25884
GO:0090304	nucleic acid metabolic process	biological_process	0.34265	1	132	707	4605	25884
GO:0004565	beta-galactosidase activity	molecular_function	0.34325	1	2	707	41	25884
GO:0005615	extracellular space	cellular_component	0.3438	1	4	707	111	25884
GO:0042158	lipoprotein biosynthetic process	biological_process	0.34491	1	3	707	74	25884
GO:0072527	pyrimidine-containing compound metabolic process	biological_process	0.34685	1	3	707	77	25884
GO:0044421	extracellular region part	cellular_component	0.3493	1	8	707	253	25884
GO:0008318	protein prenyltransferase activity	molecular_function	0.35079	1	1	707	15	25884
GO:0005047	signal recognition particle binding	molecular_function	0.35104	1	1	707	16	25884
GO:0009187	cyclic nucleotide metabolic process	biological_process	0.35157	1	1	707	16	25884
GO:0046912	transferase activity, transferring acyl groups, acyl groups converted into alkyl on transfer	molecular_function	0.35182	1	1	707	15	25884
GO:0031647	regulation of protein stability	biological_process	0.35574	1	1	707	16	25884
GO:0050821	protein stabilization	biological_process	0.35574	1	1	707	16	25884
GO:1901576	organic substance biosynthetic process	biological_process	0.35648	1	155	707	5545	25884
GO:0006333	chromatin assembly or disassembly	biological_process	0.3578	1	2	707	47	25884
GO:0065004	protein-DNA complex assembly	biological_process	0.36017	1	4	707	112	25884
GO:0071824	protein-DNA complex subunit organization	biological_process	0.36017	1	4	707	112	25884
GO:0046789	host cell surface receptor binding	molecular_function	0.36071	1	1	707	15	25884
GO:0046812	host cell surface binding	molecular_function	0.36071	1	1	707	15	25884
GO:0030198	extracellular matrix organization	biological_process	0.36078	1	1	707	15	25884
GO:0043062	extracellular structure organization	biological_process	0.36078	1	1	707	15	25884
GO:0005634	nucleus	cellular_component	0.36201	1	69	707	2394	25884
GO:0042132	fructose 1,6-bisphosphate 1-phosphatase activity	molecular_function	0.36321	1	1	707	16	25884
GO:0043900	regulation of multi-organism process	biological_process	0.36372	1	2	707	47	25884
GO:0070887	cellular response to chemical stimulus	biological_process	0.36472	1	2	707	44	25884
GO:0006541	glutamine metabolic process	biological_process	0.3652	1	2	707	45	25884
GO:0005525	GTP binding	molecular_function	0.36645	1	21	707	679	25884
GO:0008053	mitochondrial fusion	biological_process	0.36738	1	1	707	18	25884
GO:0006955	immune response	biological_process	0.36739	1	4	707	114	25884
GO:0003993	acid phosphatase activity	molecular_function	0.36929	1	2	707	45	25884
GO:0080019	fatty-acyl-CoA reductase (alcohol-forming) activity	molecular_function	0.37005	1	1	707	17	25884
GO:0008276	protein methyltransferase activity	molecular_function	0.37044	1	4	707	110	25884
GO:0044264	cellular polysaccharide metabolic process	biological_process	0.37114	1	5	707	143	25884
GO:0007165	signal transduction	biological_process	0.37161	1	40	707	1376	25884
GO:0009975	cyclase activity	molecular_function	0.372	1	1	707	17	25884
GO:0005057	receptor signaling protein activity	molecular_function	0.37324	1	3	707	76	25884
GO:0006665	sphingolipid metabolic process	biological_process	0.37375	1	1	707	16	25884
GO:0005507	copper ion binding	molecular_function	0.3744	1	5	707	141	25884
GO:0051784	negative regulation of nuclear division	biological_process	0.37566	1	1	707	17	25884
GO:0005515	protein binding	molecular_function	0.37644	1	195	707	6777	25884
GO:0006265	DNA topological change	biological_process	0.37671	1	2	707	46	25884
GO:0035556	intracellular signal transduction	biological_process	0.37799	1	16	707	533	25884
GO:0002376	immune system process	biological_process	0.37805	1	5	707	149	25884
GO:0006542	glutamine biosynthetic process	biological_process	0.37851	1	1	707	16	25884
GO:0044710	single-organism metabolic process	biological_process	0.37905	1	150	707	5257	25884
GO:0005186	pheromone activity	molecular_function	0.38236	1	1	707	17	25884
GO:0016888	endodeoxyribonuclease activity, producing 5'-phosphomonoesters	molecular_function	0.38267	1	2	707	46	25884
GO:0033588	Elongator holoenzyme complex	cellular_component	0.3846	1	1	707	17	25884
GO:0032561	guanyl ribonucleotide binding	molecular_function	0.38476	1	21	707	686	25884
GO:0016791	phosphatase activity	molecular_function	0.38499	1	9	707	277	25884
GO:0090407	organophosphate biosynthetic process	biological_process	0.38636	1	13	707	424	25884
GO:0004857	enzyme inhibitor activity	molecular_function	0.38729	1	8	707	282	25884
GO:0019882	antigen processing and presentation	biological_process	0.39032	1	1	707	18	25884
GO:0034655	nucleobase-containing compound catabolic process	biological_process	0.39228	1	3	707	80	25884
GO:0016020	membrane	cellular_component	0.39426	1	171	707	6031	25884
GO:0044391	ribosomal subunit	cellular_component	0.39501	1	1	707	20	25884
GO:0044712	single-organism catabolic process	biological_process	0.39854	1	9	707	289	25884
GO:0016782	transferase activity, transferring sulfur-containing groups	molecular_function	0.39943	1	2	707	51	25884
GO:0009539	photosystem II reaction center	cellular_component	0.39984	1	2	707	54	25884
GO:0044702	single organism reproductive process	biological_process	0.40133	1	3	707	82	25884
GO:0019001	guanyl nucleotide binding	molecular_function	0.40137	1	21	707	692	25884
GO:0042623	ATPase activity, coupled	molecular_function	0.4021	1	8	707	242	25884
GO:0006213	pyrimidine nucleoside metabolic process	biological_process	0.40324	1	1	707	20	25884
GO:0030312	external encapsulating structure	cellular_component	0.40377	1	7	707	221	25884
GO:0016054	organic acid catabolic process	biological_process	0.40408	1	2	707	49	25884
GO:0046395	carboxylic acid catabolic process	biological_process	0.40408	1	2	707	49	25884
GO:0048284	organelle fusion	biological_process	0.40485	1	1	707	20	25884
GO:0008284	positive regulation of cell proliferation	biological_process	0.40603	1	1	707	19	25884
GO:0044699	single-organism process	biological_process	0.40748	1	279	707	9947	25884
GO:0005976	polysaccharide metabolic process	biological_process	0.40818	1	6	707	182	25884
GO:0005184	neuropeptide hormone activity	molecular_function	0.40836	1	1	707	18	25884
GO:0005886	plasma membrane	cellular_component	0.40919	1	11	707	358	25884
GO:0051705	multi-organism behavior	biological_process	0.40951	1	1	707	19	25884
GO:0031124	mRNA 3'-end processing	biological_process	0.40973	1	1	707	19	25884
GO:0042558	pteridine-containing compound metabolic process	biological_process	0.41087	1	2	707	51	25884
GO:0031012	extracellular matrix	cellular_component	0.41162	1	5	707	162	25884
GO:0042393	histone binding	molecular_function	0.41169	1	2	707	49	25884
GO:0043130	ubiquitin binding	molecular_function	0.41199	1	1	707	19	25884
GO:0004506	squalene monooxygenase activity	molecular_function	0.41245	1	1	707	18	25884
GO:0046834	lipid phosphorylation	biological_process	0.41274	1	1	707	19	25884
GO:0046854	phosphatidylinositol phosphorylation	biological_process	0.41274	1	1	707	19	25884
GO:0005217	intracellular ligand-gated ion channel activity	molecular_function	0.41349	1	1	707	22	25884
GO:0005218	intracellular ligand-gated calcium channel activity	molecular_function	0.41349	1	1	707	22	25884
GO:0005219	ryanodine-sensitive calcium-release channel activity	molecular_function	0.41349	1	1	707	22	25884
GO:0015278	calcium-release channel activity	molecular_function	0.41349	1	1	707	22	25884
GO:0006974	cellular response to DNA damage stimulus	biological_process	0.41363	1	18	707	596	25884
GO:0043631	RNA polyadenylation	biological_process	0.41382	1	1	707	19	25884
GO:0019867	outer membrane	cellular_component	0.41391	1	7	707	227	25884
GO:0008023	transcription elongation factor complex	cellular_component	0.4153	1	1	707	21	25884
GO:0015925	galactosidase activity	molecular_function	0.41565	1	2	707	48	25884
GO:0004161	dimethylallyltranstransferase activity	molecular_function	0.41674	1	1	707	19	25884
GO:0019203	carbohydrate phosphatase activity	molecular_function	0.41819	1	1	707	19	25884
GO:0050308	sugar-phosphatase activity	molecular_function	0.41819	1	1	707	19	25884
GO:0005791	rough endoplasmic reticulum	cellular_component	0.41928	1	1	707	20	25884
GO:0030867	rough endoplasmic reticulum membrane	cellular_component	0.41928	1	1	707	20	25884
GO:0006083	acetate metabolic process	biological_process	0.41952	1	1	707	18	25884
GO:0043549	regulation of kinase activity	biological_process	0.41976	1	1	707	20	25884
GO:0045859	regulation of protein kinase activity	biological_process	0.41976	1	1	707	20	25884
GO:0016830	carbon-carbon lyase activity	molecular_function	0.42089	1	6	707	186	25884
GO:0006221	pyrimidine nucleotide biosynthetic process	biological_process	0.42187	1	1	707	21	25884
GO:0071944	cell periphery	cellular_component	0.4226	1	20	707	677	25884
GO:0042127	regulation of cell proliferation	biological_process	0.42277	1	1	707	20	25884
GO:0007154	cell communication	biological_process	0.42289	1	45	707	1576	25884
GO:0003873	6-phosphofructo-2-kinase activity	molecular_function	0.42296	1	1	707	22	25884
GO:0006000	fructose metabolic process	biological_process	0.42296	1	1	707	22	25884
GO:0031514	motile cilium	cellular_component	0.4285	1	2	707	53	25884
GO:0001934	positive regulation of protein phosphorylation	biological_process	0.42986	1	1	707	20	25884
GO:0042327	positive regulation of phosphorylation	biological_process	0.42986	1	1	707	20	25884
GO:0019363	pyridine nucleotide biosynthetic process	biological_process	0.43121	1	1	707	19	25884
GO:0003916	DNA topoisomerase activity	molecular_function	0.43134	1	2	707	51	25884
GO:0043167	ion binding	molecular_function	0.43574	1	225	707	7865	25884
GO:0003006	developmental process involved in reproduction	biological_process	0.43641	1	2	707	55	25884
GO:0003924	GTPase activity	molecular_function	0.43693	1	16	707	532	25884
GO:0042626	ATPase activity, coupled to transmembrane movement of substances	molecular_function	0.4394	1	5	707	151	25884
GO:0043492	ATPase activity, coupled to movement of substances	molecular_function	0.4394	1	5	707	151	25884
GO:0005905	coated pit	cellular_component	0.43977	1	1	707	20	25884
GO:0012510	trans-Golgi network transport vesicle membrane	cellular_component	0.43977	1	1	707	20	25884
GO:0030125	clathrin vesicle coat	cellular_component	0.43977	1	1	707	20	25884
GO:0030130	clathrin coat of trans-Golgi network vesicle	cellular_component	0.43977	1	1	707	20	25884
GO:0030132	clathrin coat of coated pit	cellular_component	0.43977	1	1	707	20	25884
GO:0030136	clathrin-coated vesicle	cellular_component	0.43977	1	1	707	20	25884
GO:0030140	trans-Golgi network transport vesicle	cellular_component	0.43977	1	1	707	20	25884
GO:0030665	clathrin-coated vesicle membrane	cellular_component	0.43977	1	1	707	20	25884
GO:0009081	branched-chain amino acid metabolic process	biological_process	0.44134	1	1	707	20	25884
GO:0009082	branched-chain amino acid biosynthetic process	biological_process	0.44134	1	1	707	20	25884
GO:0005102	receptor binding	molecular_function	0.44146	1	11	707	372	25884
GO:0006323	DNA packaging	biological_process	0.44166	1	3	707	89	25884
GO:0000159	protein phosphatase type 2A complex	cellular_component	0.44251	1	1	707	19	25884
GO:0008601	protein phosphatase type 2A regulator activity	molecular_function	0.44251	1	1	707	19	25884
GO:0016049	cell growth	biological_process	0.44402	1	1	707	20	25884
GO:0031123	RNA 3'-end processing	biological_process	0.44403	1	1	707	21	25884
GO:0004356	glutamate-ammonia ligase activity	molecular_function	0.44493	1	1	707	21	25884
GO:0048878	chemical homeostasis	biological_process	0.44562	1	2	707	57	25884
GO:0043414	macromolecule methylation	biological_process	0.44677	1	5	707	157	25884
GO:0005125	cytokine activity	molecular_function	0.44724	1	1	707	22	25884
GO:0000990	transcription factor activity, core RNA polymerase binding	molecular_function	0.44742	1	2	707	53	25884
GO:0000996	core DNA-dependent RNA polymerase binding promoter specificity activity	molecular_function	0.44742	1	2	707	53	25884
GO:0016987	sigma factor activity	molecular_function	0.44742	1	2	707	53	25884
GO:0010948	negative regulation of cell cycle process	biological_process	0.44752	1	1	707	21	25884
GO:0032269	negative regulation of cellular protein metabolic process	biological_process	0.44755	1	1	707	22	25884
GO:0051248	negative regulation of protein metabolic process	biological_process	0.44755	1	1	707	22	25884
GO:0006281	DNA repair	biological_process	0.44936	1	16	707	533	25884
GO:0030474	spindle pole body duplication	biological_process	0.44965	1	1	707	21	25884
GO:0051300	spindle pole body organization	biological_process	0.44965	1	1	707	21	25884
GO:0008092	cytoskeletal protein binding	molecular_function	0.45817	1	14	707	472	25884
GO:0006874	cellular calcium ion homeostasis	biological_process	0.45858	1	1	707	25	25884
GO:0055074	calcium ion homeostasis	biological_process	0.45858	1	1	707	25	25884
GO:0072503	cellular divalent inorganic cation homeostasis	biological_process	0.45858	1	1	707	25	25884
GO:0072507	divalent inorganic cation homeostasis	biological_process	0.45858	1	1	707	25	25884
GO:0034062	RNA polymerase activity	molecular_function	0.45929	1	9	707	306	25884
GO:0031225	anchored component of membrane	cellular_component	0.45941	1	1	707	21	25884
GO:0016226	iron-sulfur cluster assembly	biological_process	0.46088	1	1	707	24	25884
GO:0031163	metallo-sulfur cluster assembly	biological_process	0.46088	1	1	707	24	25884
GO:0016211	ammonia ligase activity	molecular_function	0.46126	1	1	707	22	25884
GO:0016880	acid-ammonia (or amide) ligase activity	molecular_function	0.46126	1	1	707	22	25884
GO:0004673	protein histidine kinase activity	molecular_function	0.46134	1	3	707	88	25884
GO:0016775	phosphotransferase activity, nitrogenous group as acceptor	molecular_function	0.46134	1	3	707	88	25884
GO:0044461	bacterial-type flagellum part	cellular_component	0.46227	1	1	707	23	25884
GO:0009523	photosystem II	cellular_component	0.46274	1	4	707	139	25884
GO:0009108	coenzyme biosynthetic process	biological_process	0.46328	1	6	707	195	25884
GO:0007131	reciprocal meiotic recombination	biological_process	0.46329	1	1	707	22	25884
GO:0035825	reciprocal DNA recombination	biological_process	0.46329	1	1	707	22	25884
GO:0033993	response to lipid	biological_process	0.46407	1	1	707	21	25884
GO:0043401	steroid hormone mediated signaling pathway	biological_process	0.46407	1	1	707	21	25884
GO:0048545	response to steroid hormone	biological_process	0.46407	1	1	707	21	25884
GO:0071383	cellular response to steroid hormone stimulus	biological_process	0.46407	1	1	707	21	25884
GO:0071396	cellular response to lipid	biological_process	0.46407	1	1	707	21	25884
GO:0071407	cellular response to organic cyclic compound	biological_process	0.46407	1	1	707	21	25884
GO:0009877	nodulation	biological_process	0.46422	1	2	707	58	25884
GO:0000904	cell morphogenesis involved in differentiation	biological_process	0.46499	1	1	707	22	25884
GO:0007409	axonogenesis	biological_process	0.46499	1	1	707	22	25884
GO:0007411	axon guidance	biological_process	0.46499	1	1	707	22	25884
GO:0048667	cell morphogenesis involved in neuron differentiation	biological_process	0.46499	1	1	707	22	25884
GO:0048812	neuron projection morphogenesis	biological_process	0.46499	1	1	707	22	25884
GO:0061564	axon development	biological_process	0.46499	1	1	707	22	25884
GO:0097485	neuron projection guidance	biological_process	0.46499	1	1	707	22	25884
GO:0003747	translation release factor activity	molecular_function	0.46533	1	1	707	24	25884
GO:0008079	translation termination factor activity	molecular_function	0.46533	1	1	707	24	25884
GO:0008324	cation transmembrane transporter activity	molecular_function	0.46564	1	26	707	920	25884
GO:0005759	mitochondrial matrix	cellular_component	0.46664	1	1	707	24	25884
GO:0051382	kinetochore assembly	biological_process	0.46779	1	2	707	58	25884
GO:0051383	kinetochore organization	biological_process	0.46779	1	2	707	58	25884
GO:0009061	anaerobic respiration	biological_process	0.46845	1	2	707	56	25884
GO:0015948	methanogenesis	biological_process	0.46845	1	2	707	56	25884
GO:0015975	energy derivation by oxidation of reduced inorganic compounds	biological_process	0.46845	1	2	707	56	25884
GO:0043447	alkane biosynthetic process	biological_process	0.46845	1	2	707	56	25884
GO:0022884	macromolecule transmembrane transporter activity	molecular_function	0.47075	1	1	707	24	25884
GO:0007224	smoothened signaling pathway	biological_process	0.47077	1	1	707	23	25884
GO:0048585	negative regulation of response to stimulus	biological_process	0.47078	1	1	707	22	25884
GO:0044282	small molecule catabolic process	biological_process	0.47229	1	2	707	56	25884
GO:0000003	reproduction	biological_process	0.47255	1	8	707	273	25884
GO:0019954	asexual reproduction	biological_process	0.47407	1	4	707	131	25884
GO:0019058	viral life cycle	biological_process	0.47561	1	9	707	297	25884
GO:0015947	methane metabolic process	biological_process	0.4764	1	2	707	57	25884
GO:0043446	cellular alkane metabolic process	biological_process	0.4764	1	2	707	57	25884
GO:0051782	negative regulation of cell division	biological_process	0.4767	1	1	707	23	25884
GO:0005929	cilium	cellular_component	0.47803	1	2	707	58	25884
GO:0043021	ribonucleoprotein complex binding	molecular_function	0.4785	1	1	707	25	25884
GO:0003968	RNA-directed RNA polymerase activity	molecular_function	0.47873	1	3	707	90	25884
GO:0014070	response to organic cyclic compound	biological_process	0.47938	1	1	707	22	25884
GO:0009755	hormone-mediated signaling pathway	biological_process	0.48045	1	1	707	22	25884
GO:0032870	cellular response to hormone stimulus	biological_process	0.48045	1	1	707	22	25884
GO:0006816	calcium ion transport	biological_process	0.48053	1	1	707	23	25884
GO:0010941	regulation of cell death	biological_process	0.48061	1	2	707	58	25884
GO:0042981	regulation of apoptotic process	biological_process	0.48061	1	2	707	58	25884
GO:0043067	regulation of programmed cell death	biological_process	0.48061	1	2	707	58	25884
GO:0006220	pyrimidine nucleotide metabolic process	biological_process	0.48197	1	1	707	25	25884
GO:0005975	carbohydrate metabolic process	biological_process	0.48239	1	36	707	1250	25884
GO:0000184	nuclear-transcribed mRNA catabolic process, nonsense-mediated decay	biological_process	0.48428	1	1	707	23	25884
GO:0006479	protein methylation	biological_process	0.48457	1	3	707	92	25884
GO:0008213	protein alkylation	biological_process	0.48457	1	3	707	92	25884
GO:0007166	cell surface receptor signaling pathway	biological_process	0.48747	1	3	707	95	25884
GO:0004536	deoxyribonuclease activity	molecular_function	0.48879	1	4	707	129	25884
GO:0016879	ligase activity, forming carbon-nitrogen bonds	molecular_function	0.4895	1	3	707	92	25884
GO:0006865	amino acid transport	biological_process	0.48992	1	3	707	92	25884
GO:0030203	glycosaminoglycan metabolic process	biological_process	0.49148	1	1	707	24	25884
GO:0030436	asexual sporulation	biological_process	0.49191	1	1	707	24	25884
GO:0030154	cell differentiation	biological_process	0.49247	1	4	707	132	25884
GO:0016814	hydrolase activity, acting on carbon-nitrogen (but not peptide) bonds, in cyclic amidines	molecular_function	0.49419	1	1	707	24	25884
GO:0009664	plant-type cell wall organization	biological_process	0.49528	1	1	707	25	25884
GO:0071669	plant-type cell wall organization or biogenesis	biological_process	0.49528	1	1	707	25	25884
GO:0000077	DNA damage checkpoint	biological_process	0.49677	1	1	707	25	25884
GO:0031570	DNA integrity checkpoint	biological_process	0.49677	1	1	707	25	25884
GO:0048870	cell motility	biological_process	0.49829	1	3	707	98	25884
GO:0051674	localization of cell	biological_process	0.49829	1	3	707	98	25884
GO:0016755	transferase activity, transferring amino-acyl groups	molecular_function	0.49971	1	1	707	25	25884
GO:0009058	biosynthetic process	biological_process	0.50209	1	158	707	5798	25884
GO:0004601	peroxidase activity	molecular_function	0.5052	1	4	707	140	25884
GO:2001070	starch binding	molecular_function	0.50618	1	1	707	25	25884
GO:0005578	proteinaceous extracellular matrix	cellular_component	0.50725	1	4	707	142	25884
GO:0005516	calmodulin binding	molecular_function	0.50744	1	2	707	59	25884
GO:0009888	tissue development	biological_process	0.50857	1	2	707	61	25884
GO:0072528	pyrimidine-containing compound biosynthetic process	biological_process	0.50895	1	2	707	63	25884
GO:0046872	metal ion binding	molecular_function	0.50956	1	103	707	3735	25884
GO:0003729	mRNA binding	molecular_function	0.51377	1	1	707	26	25884
GO:0044822	poly(A) RNA binding	molecular_function	0.51377	1	1	707	26	25884
GO:0006310	DNA recombination	biological_process	0.51436	1	11	707	378	25884
GO:0042765	GPI-anchor transamidase complex	cellular_component	0.51474	1	1	707	26	25884
GO:0006813	potassium ion transport	biological_process	0.51497	1	5	707	166	25884
GO:0006304	DNA modification	biological_process	0.51766	1	2	707	61	25884
GO:0030674	protein binding, bridging	molecular_function	0.51835	1	2	707	64	25884
GO:0060090	binding, bridging	molecular_function	0.51835	1	2	707	64	25884
GO:0044419	interspecies interaction between organisms	biological_process	0.5194	1	17	707	599	25884
GO:0031175	neuron projection development	biological_process	0.51944	1	1	707	26	25884
GO:0048666	neuron development	biological_process	0.51944	1	1	707	26	25884
GO:0003899	DNA-directed RNA polymerase activity	molecular_function	0.52166	1	6	707	216	25884
GO:0048468	cell development	biological_process	0.52273	1	2	707	64	25884
GO:0036442	hydrogen-exporting ATPase activity	molecular_function	0.52317	1	1	707	28	25884
GO:0046961	proton-transporting ATPase activity, rotational mechanism	molecular_function	0.52317	1	1	707	28	25884
GO:0007034	vacuolar transport	biological_process	0.5241	1	1	707	29	25884
GO:0010562	positive regulation of phosphorus metabolic process	biological_process	0.52458	1	1	707	26	25884
GO:0031401	positive regulation of protein modification process	biological_process	0.52458	1	1	707	26	25884
GO:0045937	positive regulation of phosphate metabolic process	biological_process	0.52458	1	1	707	26	25884
GO:0004520	endodeoxyribonuclease activity	molecular_function	0.5263	1	2	707	62	25884
GO:0044801	single-organism membrane fusion	biological_process	0.52681	1	1	707	28	25884
GO:0004129	cytochrome-c oxidase activity	molecular_function	0.52696	1	2	707	67	25884
GO:0016675	oxidoreductase activity, acting on a heme group of donors	molecular_function	0.52696	1	2	707	67	25884
GO:0016676	oxidoreductase activity, acting on a heme group of donors, oxygen as acceptor	molecular_function	0.52696	1	2	707	67	25884
GO:0030030	cell projection organization	biological_process	0.52731	1	2	707	63	25884
GO:0004488	methylenetetrahydrofolate dehydrogenase (NADP+) activity	molecular_function	0.52791	1	1	707	27	25884
GO:0004222	metalloendopeptidase activity	molecular_function	0.52861	1	4	707	137	25884
GO:0006415	translational termination	biological_process	0.5294	1	1	707	29	25884
GO:0006139	nucleobase-containing compound metabolic process	biological_process	0.52954	1	140	707	5080	25884
GO:0016679	oxidoreductase activity, acting on diphenols and related substances as donors	molecular_function	0.52969	1	2	707	65	25884
GO:0048038	quinone binding	molecular_function	0.53014	1	1	707	26	25884
GO:0016278	lysine N-methyltransferase activity	molecular_function	0.53029	1	2	707	62	25884
GO:0016279	protein-lysine N-methyltransferase activity	molecular_function	0.53029	1	2	707	62	25884
GO:0018024	histone-lysine N-methyltransferase activity	molecular_function	0.53029	1	2	707	62	25884
GO:0042054	histone methyltransferase activity	molecular_function	0.53029	1	2	707	62	25884
GO:0046483	heterocycle metabolic process	biological_process	0.53249	1	150	707	5448	25884
GO:0032259	methylation	biological_process	0.53449	1	5	707	174	25884
GO:0008287	protein serine/threonine phosphatase complex	cellular_component	0.53512	1	1	707	25	25884
GO:1903293	phosphatase complex	cellular_component	0.53512	1	1	707	25	25884
GO:0051049	regulation of transport	biological_process	0.53552	1	1	707	26	25884
GO:0051701	interaction with host	biological_process	0.53552	1	5	707	173	25884
GO:0009308	amine metabolic process	biological_process	0.5356	1	4	707	139	25884
GO:0001510	RNA methylation	biological_process	0.53597	1	2	707	64	25884
GO:0044463	cell projection part	cellular_component	0.53707	1	1	707	28	25884
GO:0051187	cofactor catabolic process	biological_process	0.53793	1	2	707	67	25884
GO:0006368	transcription elongation from RNA polymerase II promoter	biological_process	0.5393	1	1	707	29	25884
GO:0050790	regulation of catalytic activity	biological_process	0.53944	1	3	707	107	25884
GO:0007276	gamete generation	biological_process	0.53959	1	2	707	64	25884
GO:0006739	NADP metabolic process	biological_process	0.54222	1	1	707	27	25884
GO:0022008	neurogenesis	biological_process	0.54461	1	1	707	28	25884
GO:0030182	neuron differentiation	biological_process	0.54461	1	1	707	28	25884
GO:0048699	generation of neurons	biological_process	0.54461	1	1	707	28	25884
GO:0016032	viral process	biological_process	0.54569	1	14	707	499	25884
GO:0098589	membrane region	cellular_component	0.5476	1	1	707	27	25884
GO:0004386	helicase activity	molecular_function	0.54834	1	13	707	450	25884
GO:0043169	cation binding	molecular_function	0.54918	1	103	707	3768	25884
GO:0043093	FtsZ-dependent cytokinesis	biological_process	0.55111	1	3	707	107	25884
GO:0008272	sulfate transport	biological_process	0.55319	1	1	707	27	25884
GO:0015116	sulfate transmembrane transporter activity	molecular_function	0.55319	1	1	707	27	25884
GO:0004003	ATP-dependent DNA helicase activity	molecular_function	0.55401	1	1	707	28	25884
GO:0006480	N-terminal protein amino acid methylation	biological_process	0.55421	1	1	707	29	25884
GO:0031365	N-terminal protein amino acid modification	biological_process	0.55421	1	1	707	29	25884
GO:0046933	proton-transporting ATP synthase activity, rotational mechanism	molecular_function	0.5544	1	1	707	30	25884
GO:0008283	cell proliferation	biological_process	0.55639	1	1	707	34	25884
GO:0030259	lipid glycosylation	biological_process	0.55735	1	1	707	28	25884
GO:0004529	exodeoxyribonuclease activity	molecular_function	0.55762	1	2	707	67	25884
GO:0008855	exodeoxyribonuclease VII activity	molecular_function	0.55762	1	2	707	67	25884
GO:0016895	exodeoxyribonuclease activity, producing 5'-phosphomonoesters	molecular_function	0.55762	1	2	707	67	25884
GO:0007399	nervous system development	biological_process	0.55767	1	1	707	29	25884
GO:0006109	regulation of carbohydrate metabolic process	biological_process	0.55854	1	1	707	28	25884
GO:0015399	primary active transmembrane transporter activity	molecular_function	0.5601	1	5	707	173	25884
GO:0015405	P-P-bond-hydrolysis-driven transmembrane transporter activity	molecular_function	0.5601	1	5	707	173	25884
GO:0009064	glutamine family amino acid metabolic process	biological_process	0.56028	1	2	707	66	25884
GO:0007186	G-protein coupled receptor signaling pathway	biological_process	0.56121	1	7	707	258	25884
GO:0016160	amylase activity	molecular_function	0.56143	1	1	707	27	25884
GO:0019079	viral genome replication	biological_process	0.562	1	3	707	100	25884
GO:0015002	heme-copper terminal oxidase activity	molecular_function	0.56278	1	2	707	71	25884
GO:0045261	proton-transporting ATP synthase complex, catalytic core F(1)	cellular_component	0.56553	1	1	707	31	25884
GO:0033179	proton-transporting V-type ATPase, V0 domain	cellular_component	0.56681	1	2	707	72	25884
GO:1901682	sulfur compound transmembrane transporter activity	molecular_function	0.56684	1	1	707	28	25884
GO:0005783	endoplasmic reticulum	cellular_component	0.56792	1	9	707	334	25884
GO:0009982	pseudouridine synthase activity	molecular_function	0.57022	1	1	707	29	25884
GO:0071973	bacterial-type flagellum-dependent cell motility	biological_process	0.57134	1	1	707	32	25884
GO:0051783	regulation of nuclear division	biological_process	0.57213	1	1	707	30	25884
GO:0007127	meiosis I	biological_process	0.57355	1	1	707	31	25884
GO:0008948	oxaloacetate decarboxylase activity	molecular_function	0.57385	1	1	707	30	25884
GO:0035725	sodium ion transmembrane transport	biological_process	0.57385	1	1	707	30	25884
GO:0071436	sodium ion export	biological_process	0.57385	1	1	707	30	25884
GO:0042398	cellular modified amino acid biosynthetic process	biological_process	0.57396	1	2	707	68	25884
GO:0051716	cellular response to stimulus	biological_process	0.57397	1	53	707	1957	25884
GO:0046915	transition metal ion transmembrane transporter activity	molecular_function	0.5741	1	4	707	146	25884
GO:0031023	microtubule organizing center organization	biological_process	0.57619	1	1	707	30	25884
GO:0051539	4 iron, 4 sulfur cluster binding	molecular_function	0.57669	1	1	707	29	25884
GO:0000956	nuclear-transcribed mRNA catabolic process	biological_process	0.57707	1	1	707	30	25884
GO:0019888	protein phosphatase regulator activity	molecular_function	0.57893	1	1	707	29	25884
GO:0016684	oxidoreductase activity, acting on peroxide as acceptor	molecular_function	0.57917	1	4	707	153	25884
GO:0032182	ubiquitin-like protein binding	molecular_function	0.57954	1	1	707	30	25884
GO:0072348	sulfur compound transport	biological_process	0.5797	1	1	707	29	25884
GO:0017111	nucleoside-triphosphatase activity	molecular_function	0.58009	1	35	707	1249	25884
GO:0071495	cellular response to endogenous stimulus	biological_process	0.58045	1	1	707	29	25884
GO:0070008	serine-type exopeptidase activity	molecular_function	0.58211	1	3	707	105	25884
GO:0030145	manganese ion binding	molecular_function	0.58477	1	1	707	31	25884
GO:0051607	defense response to virus	biological_process	0.58512	1	1	707	31	25884
GO:1901700	response to oxygen-containing compound	biological_process	0.58545	1	1	707	34	25884
GO:0008610	lipid biosynthetic process	biological_process	0.58572	1	16	707	590	25884
GO:0007010	cytoskeleton organization	biological_process	0.5892	1	11	707	406	25884
GO:0016820	hydrolase activity, acting on acid anhydrides, catalyzing transmembrane movement of substances	molecular_function	0.58977	1	6	707	214	25884
GO:0051336	regulation of hydrolase activity	biological_process	0.59119	1	1	707	36	25884
GO:0019637	organophosphate metabolic process	biological_process	0.59133	1	20	707	747	25884
GO:0030031	cell projection assembly	biological_process	0.5915	1	1	707	31	25884
GO:0005992	trehalose biosynthetic process	biological_process	0.59178	1	1	707	30	25884
GO:0002252	immune effector process	biological_process	0.59252	1	1	707	32	25884
GO:0040007	growth	biological_process	0.5932	1	1	707	31	25884
GO:0022857	transmembrane transporter activity	molecular_function	0.59428	1	45	707	1644	25884
GO:0006732	coenzyme metabolic process	biological_process	0.59468	1	8	707	298	25884
GO:0051338	regulation of transferase activity	biological_process	0.59476	1	1	707	33	25884
GO:0044769	ATPase activity, coupled to transmembrane movement of ions, rotational mechanism	molecular_function	0.59545	1	1	707	34	25884
GO:0031090	organelle membrane	cellular_component	0.5955	1	20	707	748	25884
GO:0000281	mitotic cytokinesis	biological_process	0.59552	1	3	707	114	25884
GO:0000917	barrier septum assembly	biological_process	0.59552	1	3	707	114	25884
GO:0032506	cytokinetic process	biological_process	0.59552	1	3	707	114	25884
GO:0061640	cytoskeleton-dependent cytokinesis	biological_process	0.59552	1	3	707	114	25884
GO:0090529	cell septum assembly	biological_process	0.59552	1	3	707	114	25884
GO:1902410	mitotic cytokinetic process	biological_process	0.59552	1	3	707	114	25884
GO:0006497	protein lipidation	biological_process	0.59586	1	2	707	71	25884
GO:0006506	GPI anchor biosynthetic process	biological_process	0.59586	1	2	707	71	25884
GO:0006661	phosphatidylinositol biosynthetic process	biological_process	0.59586	1	2	707	71	25884
GO:0003676	nucleic acid binding	molecular_function	0.59649	1	126	707	4653	25884
GO:0000041	transition metal ion transport	biological_process	0.5971	1	4	707	152	25884
GO:0015936	coenzyme A metabolic process	biological_process	0.59779	1	1	707	31	25884
GO:0005261	cation channel activity	molecular_function	0.59832	1	3	707	113	25884
GO:0044403	symbiosis, encompassing mutualism through parasitism	biological_process	0.5995	1	16	707	592	25884
GO:0009084	glutamine family amino acid biosynthetic process	biological_process	0.6015	1	1	707	31	25884
GO:0044237	cellular metabolic process	biological_process	0.60233	1	274	707	10050	25884
GO:0051704	multi-organism process	biological_process	0.60441	1	36	707	1326	25884
GO:0032403	protein complex binding	molecular_function	0.60468	1	8	707	301	25884
GO:0006631	fatty acid metabolic process	biological_process	0.60601	1	6	707	226	25884
GO:1901360	organic cyclic compound metabolic process	biological_process	0.60663	1	153	707	5634	25884
GO:0043233	organelle lumen	cellular_component	0.60741	1	12	707	464	25884
GO:0070013	intracellular organelle lumen	cellular_component	0.60741	1	12	707	464	25884
GO:0072350	tricarboxylic acid metabolic process	biological_process	0.60956	1	1	707	34	25884
GO:0006072	glycerol-3-phosphate metabolic process	biological_process	0.61117	1	1	707	33	25884
GO:0046168	glycerol-3-phosphate catabolic process	biological_process	0.61117	1	1	707	33	25884
GO:0008443	phosphofructokinase activity	molecular_function	0.6113	1	1	707	35	25884
GO:0048519	negative regulation of biological process	biological_process	0.61139	1	5	707	192	25884
GO:0032502	developmental process	biological_process	0.6125	1	12	707	459	25884
GO:0031974	membrane-enclosed lumen	cellular_component	0.61408	1	12	707	467	25884
GO:0046700	heterocycle catabolic process	biological_process	0.61528	1	4	707	155	25884
GO:0046351	disaccharide biosynthetic process	biological_process	0.61558	1	1	707	32	25884
GO:0098519	nucleotide phosphatase activity, acting on free nucleotides	molecular_function	0.61579	1	3	707	109	25884
GO:0003896	DNA primase activity	molecular_function	0.61606	1	1	707	34	25884
GO:0030695	GTPase regulator activity	molecular_function	0.61779	1	2	707	72	25884
GO:0009396	folic acid-containing compound biosynthetic process	biological_process	0.61894	1	1	707	34	25884
GO:0009987	cellular process	biological_process	0.62271	1	369	707	13526	25884
GO:0019200	carbohydrate kinase activity	molecular_function	0.62311	1	1	707	36	25884
GO:0001539	cilium or flagellum-dependent cell motility	biological_process	0.62353	1	1	707	37	25884
GO:0097588	archaeal or bacterial-type flagellum-dependent cell motility	biological_process	0.62353	1	1	707	37	25884
GO:0003333	amino acid transmembrane transport	biological_process	0.62441	1	2	707	72	25884
GO:1903825	organic acid transmembrane transport	biological_process	0.62441	1	2	707	72	25884
GO:0003857	3-hydroxyacyl-CoA dehydrogenase activity	molecular_function	0.62527	1	2	707	76	25884
GO:1901361	organic cyclic compound catabolic process	biological_process	0.62611	1	4	707	157	25884
GO:0005342	organic acid transmembrane transporter activity	molecular_function	0.62645	1	2	707	74	25884
GO:0046943	carboxylic acid transmembrane transporter activity	molecular_function	0.62645	1	2	707	74	25884
GO:0007218	neuropeptide signaling pathway	biological_process	0.6272	1	1	707	34	25884
GO:0030976	thiamine pyrophosphate binding	molecular_function	0.6284	1	1	707	34	25884
GO:0048609	multicellular organismal reproductive process	biological_process	0.62919	1	2	707	76	25884
GO:0098656	anion transmembrane transport	biological_process	0.63216	1	2	707	73	25884
GO:0045502	dynein binding	molecular_function	0.63274	1	2	707	77	25884
GO:0016462	pyrophosphatase activity	molecular_function	0.63305	1	35	707	1277	25884
GO:0019208	phosphatase regulator activity	molecular_function	0.63399	1	1	707	34	25884
GO:0048869	cellular developmental process	biological_process	0.63469	1	5	707	193	25884
GO:0046474	glycerophospholipid biosynthetic process	biological_process	0.63522	1	2	707	76	25884
GO:0044723	single-organism carbohydrate metabolic process	biological_process	0.63594	1	14	707	528	25884
GO:0045786	negative regulation of cell cycle	biological_process	0.63638	1	1	707	37	25884
GO:0044270	cellular nitrogen compound catabolic process	biological_process	0.63735	1	4	707	159	25884
GO:0006725	cellular aromatic compound metabolic process	biological_process	0.63739	1	147	707	5445	25884
GO:0001932	regulation of protein phosphorylation	biological_process	0.63764	1	1	707	37	25884
GO:0006302	double-strand break repair	biological_process	0.63907	1	1	707	37	25884
GO:0006354	DNA-templated transcription, elongation	biological_process	0.63918	1	1	707	37	25884
GO:0031981	nuclear lumen	cellular_component	0.64135	1	11	707	436	25884
GO:0045735	nutrient reservoir activity	molecular_function	0.64263	1	2	707	91	25884
GO:0004866	endopeptidase inhibitor activity	molecular_function	0.64295	1	2	707	98	25884
GO:0061135	endopeptidase regulator activity	molecular_function	0.64295	1	2	707	98	25884
GO:0035091	phosphatidylinositol binding	molecular_function	0.64312	1	1	707	35	25884
GO:0065009	regulation of molecular function	biological_process	0.64336	1	3	707	123	25884
GO:0009236	cobalamin biosynthetic process	biological_process	0.644	1	1	707	38	25884
GO:0007281	germ cell development	biological_process	0.64416	1	1	707	38	25884
GO:0006873	cellular ion homeostasis	biological_process	0.6442	1	1	707	40	25884
GO:0006875	cellular metal ion homeostasis	biological_process	0.6442	1	1	707	40	25884
GO:0030003	cellular cation homeostasis	biological_process	0.6442	1	1	707	40	25884
GO:0051188	cofactor biosynthetic process	biological_process	0.64452	1	8	707	310	25884
GO:0042325	regulation of phosphorylation	biological_process	0.64476	1	1	707	38	25884
GO:0032270	positive regulation of cellular protein metabolic process	biological_process	0.64623	1	1	707	38	25884
GO:0051247	positive regulation of protein metabolic process	biological_process	0.64623	1	1	707	38	25884
GO:0016620	oxidoreductase activity, acting on the aldehyde or oxo group of donors, NAD or NADP as acceptor	molecular_function	0.64653	1	2	707	79	25884
GO:0072525	pyridine-containing compound biosynthetic process	biological_process	0.6478	1	1	707	36	25884
GO:0019439	aromatic compound catabolic process	biological_process	0.64824	1	4	707	161	25884
GO:0042157	lipoprotein metabolic process	biological_process	0.64834	1	3	707	122	25884
GO:0012505	endomembrane system	cellular_component	0.64837	1	16	707	613	25884
GO:0007015	actin filament organization	biological_process	0.6485	1	1	707	38	25884
GO:0051536	iron-sulfur cluster binding	molecular_function	0.64915	1	4	707	162	25884
GO:0051540	metal cluster binding	molecular_function	0.64915	1	4	707	162	25884
GO:0055065	metal ion homeostasis	biological_process	0.64996	1	1	707	41	25884
GO:0010639	negative regulation of organelle organization	biological_process	0.65001	1	1	707	37	25884
GO:0019083	viral transcription	biological_process	0.65136	1	1	707	37	25884
GO:0043624	cellular protein complex disassembly	biological_process	0.65469	1	1	707	40	25884
GO:0008514	organic anion transmembrane transporter activity	molecular_function	0.65537	1	2	707	78	25884
GO:0008643	carbohydrate transport	biological_process	0.65727	1	2	707	83	25884
GO:0008237	metallopeptidase activity	molecular_function	0.65821	1	4	707	161	25884
GO:0001522	pseudouridine synthesis	biological_process	0.65889	1	1	707	38	25884
GO:0050801	ion homeostasis	biological_process	0.66036	1	1	707	42	25884
GO:0055080	cation homeostasis	biological_process	0.66036	1	1	707	42	25884
GO:0098771	inorganic ion homeostasis	biological_process	0.66036	1	1	707	42	25884
GO:0016646	oxidoreductase activity, acting on the CH-NH group of donors, NAD or NADP as acceptor	molecular_function	0.66054	1	1	707	38	25884
GO:0005798	Golgi-associated vesicle	cellular_component	0.66154	1	1	707	37	25884
GO:0030660	Golgi-associated vesicle membrane	cellular_component	0.66154	1	1	707	37	25884
GO:0007126	meiotic nuclear division	biological_process	0.66157	1	1	707	39	25884
GO:1903046	meiotic cell cycle process	biological_process	0.66157	1	1	707	39	25884
GO:0052646	alditol phosphate metabolic process	biological_process	0.66587	1	1	707	38	25884
GO:0033865	nucleoside bisphosphate metabolic process	biological_process	0.66594	1	1	707	37	25884
GO:0033875	ribonucleoside bisphosphate metabolic process	biological_process	0.66594	1	1	707	37	25884
GO:0034032	purine nucleoside bisphosphate metabolic process	biological_process	0.66594	1	1	707	37	25884
GO:0042546	cell wall biogenesis	biological_process	0.66655	1	1	707	38	25884
GO:0005991	trehalose metabolic process	biological_process	0.66839	1	1	707	37	25884
GO:0098805	whole membrane	cellular_component	0.66849	1	8	707	316	25884
GO:0000786	nucleosome	cellular_component	0.67009	1	1	707	40	25884
GO:0005742	mitochondrial outer membrane translocase complex	cellular_component	0.6702	1	1	707	40	25884
GO:0009235	cobalamin metabolic process	biological_process	0.67355	1	1	707	41	25884
GO:0043934	sporulation	biological_process	0.67454	1	1	707	39	25884
GO:0006807	nitrogen compound metabolic process	biological_process	0.67708	1	175	707	6603	25884
GO:0003854	3-beta-hydroxy-delta5-steroid dehydrogenase activity	molecular_function	0.67796	1	4	707	169	25884
GO:0016229	steroid dehydrogenase activity	molecular_function	0.67796	1	4	707	169	25884
GO:0033764	steroid dehydrogenase activity, acting on the CH-OH group of donors, NAD or NADP as acceptor	molecular_function	0.67796	1	4	707	169	25884
GO:0051129	negative regulation of cellular component organization	biological_process	0.67827	1	1	707	40	25884
GO:0051301	cell division	biological_process	0.67846	1	5	707	211	25884
GO:0003743	translation initiation factor activity	molecular_function	0.67942	1	2	707	89	25884
GO:0008146	sulfotransferase activity	molecular_function	0.67971	1	1	707	42	25884
GO:0050661	NADP binding	molecular_function	0.68012	1	2	707	81	25884
GO:0003707	steroid hormone receptor activity	molecular_function	0.68017	1	1	707	40	25884
GO:0000774	adenyl-nucleotide exchange factor activity	molecular_function	0.68126	1	1	707	40	25884
GO:0043231	intracellular membrane-bounded organelle	cellular_component	0.68192	1	91	707	3450	25884
GO:0004871	signal transducer activity	molecular_function	0.68217	1	12	707	480	25884
GO:0016811	hydrolase activity, acting on carbon-nitrogen (but not peptide) bonds, in linear amides	molecular_function	0.68279	1	1	707	42	25884
GO:0032504	multicellular organism reproduction	biological_process	0.68369	1	2	707	84	25884
GO:0003697	single-stranded DNA binding	molecular_function	0.68408	1	1	707	43	25884
GO:0022890	inorganic cation transmembrane transporter activity	molecular_function	0.68585	1	21	707	837	25884
GO:0005496	steroid binding	molecular_function	0.68653	1	1	707	41	25884
GO:0043227	membrane-bounded organelle	cellular_component	0.68663	1	91	707	3454	25884
GO:0019829	cation-transporting ATPase activity	molecular_function	0.6901	1	1	707	44	25884
GO:0042625	ATPase activity, coupled to transmembrane movement of ions	molecular_function	0.6901	1	1	707	44	25884
GO:0016810	hydrolase activity, acting on carbon-nitrogen (but not peptide) bonds	molecular_function	0.69178	1	2	707	86	25884
GO:0071822	protein complex subunit organization	biological_process	0.69289	1	11	707	454	25884
GO:0032993	protein-DNA complex	cellular_component	0.69423	1	1	707	43	25884
GO:0044459	plasma membrane part	cellular_component	0.69515	1	5	707	211	25884
GO:0017119	Golgi transport complex	cellular_component	0.69633	1	1	707	41	25884
GO:0030414	peptidase inhibitor activity	molecular_function	0.6965	1	2	707	106	25884
GO:0061134	peptidase regulator activity	molecular_function	0.6965	1	2	707	106	25884
GO:0065008	regulation of biological quality	biological_process	0.6989	1	14	707	587	25884
GO:0016861	intramolecular oxidoreductase activity, interconverting aldoses and ketoses	molecular_function	0.69939	1	1	707	44	25884
GO:0044815	DNA packaging complex	cellular_component	0.69939	1	1	707	43	25884
GO:0042559	pteridine-containing compound biosynthetic process	biological_process	0.69941	1	1	707	43	25884
GO:0000902	cell morphogenesis	biological_process	0.69979	1	2	707	83	25884
GO:0032989	cellular component morphogenesis	biological_process	0.69979	1	2	707	83	25884
GO:0032879	regulation of localization	biological_process	0.6998	1	1	707	41	25884
GO:0030118	clathrin coat	cellular_component	0.70499	1	1	707	41	25884
GO:0045017	glycerolipid biosynthetic process	biological_process	0.70783	1	2	707	87	25884
GO:0071705	nitrogen compound transport	biological_process	0.708	1	6	707	252	25884
GO:0009991	response to extracellular stimulus	biological_process	0.70897	1	1	707	47	25884
GO:0031668	cellular response to extracellular stimulus	biological_process	0.70897	1	1	707	47	25884
GO:0071496	cellular response to external stimulus	biological_process	0.70897	1	1	707	47	25884
GO:0072330	monocarboxylic acid biosynthetic process	biological_process	0.70988	1	3	707	133	25884
GO:0030234	enzyme regulator activity	molecular_function	0.71163	1	12	707	519	25884
GO:0019013	viral nucleocapsid	cellular_component	0.71266	1	1	707	45	25884
GO:0008170	N-methyltransferase activity	molecular_function	0.71396	1	2	707	87	25884
GO:0006915	apoptotic process	biological_process	0.71588	1	2	707	89	25884
GO:0012501	programmed cell death	biological_process	0.71588	1	2	707	89	25884
GO:0098799	outer mitochondrial membrane protein complex	cellular_component	0.71683	1	1	707	46	25884
GO:0022412	cellular process involved in reproduction in multicellular organism	biological_process	0.71713	1	1	707	46	25884
GO:0009521	photosystem	cellular_component	0.71854	1	4	707	196	25884
GO:0006694	steroid biosynthetic process	biological_process	0.71974	1	4	707	179	25884
GO:0009966	regulation of signal transduction	biological_process	0.71976	1	2	707	88	25884
GO:0008608	attachment of spindle microtubules to kinetochore	biological_process	0.72096	1	1	707	46	25884
GO:0019684	photosynthesis, light reaction	biological_process	0.72137	1	1	707	49	25884
GO:0006935	chemotaxis	biological_process	0.72216	1	1	707	46	25884
GO:0006614	SRP-dependent cotranslational protein targeting to membrane	biological_process	0.72285	1	2	707	89	25884
GO:0045047	protein targeting to ER	biological_process	0.72285	1	2	707	89	25884
GO:0072599	establishment of protein localization to endoplasmic reticulum	biological_process	0.72285	1	2	707	89	25884
GO:0016597	amino acid binding	molecular_function	0.72314	1	2	707	90	25884
GO:0000776	kinetochore	cellular_component	0.72359	1	3	707	136	25884
GO:0019220	regulation of phosphate metabolic process	biological_process	0.72969	1	1	707	48	25884
GO:0051174	regulation of phosphorus metabolic process	biological_process	0.72969	1	1	707	48	25884
GO:0006928	movement of cell or subcellular component	biological_process	0.73045	1	5	707	215	25884
GO:0008202	steroid metabolic process	biological_process	0.73074	1	4	707	182	25884
GO:0016796	exonuclease activity, active with either ribo- or deoxyribonucleic acids and producing 5'-phosphomonoesters	molecular_function	0.73102	1	2	707	92	25884
GO:0005085	guanyl-nucleotide exchange factor activity	molecular_function	0.73134	1	1	707	44	25884
GO:0015144	carbohydrate transmembrane transporter activity	molecular_function	0.73266	1	1	707	49	25884
GO:1901476	carbohydrate transporter activity	molecular_function	0.73266	1	1	707	49	25884
GO:0060089	molecular transducer activity	molecular_function	0.73372	1	12	707	502	25884
GO:0031406	carboxylic acid binding	molecular_function	0.73448	1	2	707	92	25884
GO:0043177	organic acid binding	molecular_function	0.73448	1	2	707	92	25884
GO:0008026	ATP-dependent helicase activity	molecular_function	0.735	1	1	707	45	25884
GO:0070035	purine NTP-dependent helicase activity	molecular_function	0.735	1	1	707	45	25884
GO:0006260	DNA replication	biological_process	0.73662	1	12	707	502	25884
GO:0016860	intramolecular oxidoreductase activity	molecular_function	0.7379	1	1	707	49	25884
GO:0034453	microtubule anchoring	biological_process	0.73858	1	1	707	49	25884
GO:0016887	ATPase activity	molecular_function	0.73879	1	18	707	705	25884
GO:0000785	chromatin	cellular_component	0.7415	1	1	707	49	25884
GO:0016746	transferase activity, transferring acyl groups	molecular_function	0.74244	1	12	707	499	25884
GO:0032787	monocarboxylic acid metabolic process	biological_process	0.74257	1	8	707	343	25884
GO:0060589	nucleoside-triphosphatase regulator activity	molecular_function	0.74475	1	3	707	139	25884
GO:0009733	response to auxin	biological_process	0.74476	1	1	707	67	25884
GO:0016591	DNA-directed RNA polymerase II, holoenzyme	cellular_component	0.74537	1	2	707	100	25884
GO:0000775	chromosome, centromeric region	cellular_component	0.74751	1	4	707	185	25884
GO:0010646	regulation of cell communication	biological_process	0.74797	1	2	707	93	25884
GO:0009615	response to virus	biological_process	0.74968	1	1	707	50	25884
GO:0044764	multi-organism cellular process	biological_process	0.7501	1	14	707	576	25884
GO:0008757	S-adenosylmethionine-dependent methyltransferase activity	molecular_function	0.75021	1	4	707	181	25884
GO:0051321	meiotic cell cycle	biological_process	0.75152	1	1	707	50	25884
GO:0034641	cellular nitrogen compound metabolic process	biological_process	0.75217	1	163	707	6260	25884
GO:0048523	negative regulation of cellular process	biological_process	0.75244	1	3	707	142	25884
GO:0023051	regulation of signaling	biological_process	0.75347	1	2	707	94	25884
GO:0009896	positive regulation of catabolic process	biological_process	0.7565	1	1	707	52	25884
GO:0010508	positive regulation of autophagy	biological_process	0.7565	1	1	707	52	25884
GO:0031331	positive regulation of cellular catabolic process	biological_process	0.7565	1	1	707	52	25884
GO:0016627	oxidoreductase activity, acting on the CH-CH group of donors	molecular_function	0.75656	1	4	707	183	25884
GO:1902494	catalytic complex	cellular_component	0.75688	1	19	707	807	25884
GO:0000910	cytokinesis	biological_process	0.75705	1	3	707	145	25884
GO:0006779	porphyrin-containing compound biosynthetic process	biological_process	0.75718	1	2	707	95	25884
GO:0003777	microtubule motor activity	molecular_function	0.75775	1	2	707	90	25884
GO:0016818	hydrolase activity, acting on acid anhydrides, in phosphorus-containing anhydrides	molecular_function	0.75808	1	37	707	1433	25884
GO:0022414	reproductive process	biological_process	0.75834	1	6	707	259	25884
GO:0006461	protein complex assembly	biological_process	0.75842	1	9	707	398	25884
GO:0034622	cellular macromolecular complex assembly	biological_process	0.76062	1	8	707	358	25884
GO:0070271	protein complex biogenesis	biological_process	0.76127	1	9	707	399	25884
GO:0008137	NADH dehydrogenase (ubiquinone) activity	molecular_function	0.76185	1	1	707	57	25884
GO:0050136	NADH dehydrogenase (quinone) activity	molecular_function	0.76185	1	1	707	57	25884
GO:0004527	exonuclease activity	molecular_function	0.76368	1	3	707	143	25884
GO:0006613	cotranslational protein targeting to membrane	biological_process	0.76387	1	2	707	97	25884
GO:0009306	protein secretion	biological_process	0.76463	1	1	707	52	25884
GO:0042330	taxis	biological_process	0.76563	1	1	707	52	25884
GO:0043161	proteasome-mediated ubiquitin-dependent protein catabolic process	biological_process	0.76695	1	1	707	50	25884
GO:0010333	terpene synthase activity	molecular_function	0.76928	1	1	707	52	25884
GO:0043241	protein complex disassembly	biological_process	0.77007	1	1	707	54	25884
GO:0010564	regulation of cell cycle process	biological_process	0.77188	1	1	707	52	25884
GO:0048193	Golgi vesicle transport	biological_process	0.77244	1	5	707	229	25884
GO:0009890	negative regulation of biosynthetic process	biological_process	0.77251	1	1	707	53	25884
GO:0010558	negative regulation of macromolecule biosynthetic process	biological_process	0.77251	1	1	707	53	25884
GO:0031327	negative regulation of cellular biosynthetic process	biological_process	0.77251	1	1	707	53	25884
GO:0051172	negative regulation of nitrogen compound metabolic process	biological_process	0.77251	1	1	707	53	25884
GO:2000113	negative regulation of cellular macromolecule biosynthetic process	biological_process	0.77251	1	1	707	53	25884
GO:0044448	cell cortex part	cellular_component	0.77269	1	2	707	96	25884
GO:0051186	cofactor metabolic process	biological_process	0.77293	1	11	707	475	25884
GO:0019953	sexual reproduction	biological_process	0.77321	1	2	707	100	25884
GO:0007264	small GTPase mediated signal transduction	biological_process	0.7739	1	5	707	241	25884
GO:0051276	chromosome organization	biological_process	0.7742	1	11	707	478	25884
GO:0016747	transferase activity, transferring acyl groups other than amino-acyl groups	molecular_function	0.77453	1	9	707	395	25884
GO:0048731	system development	biological_process	0.77515	1	1	707	53	25884
GO:0015075	ion transmembrane transporter activity	molecular_function	0.77566	1	29	707	1179	25884
GO:0019842	vitamin binding	molecular_function	0.77579	1	1	707	52	25884
GO:0006417	regulation of translation	biological_process	0.77605	1	3	707	137	25884
GO:0034248	regulation of cellular amide metabolic process	biological_process	0.77605	1	3	707	137	25884
GO:0009405	pathogenesis	biological_process	0.77639	1	7	707	313	25884
GO:0015077	monovalent inorganic cation transmembrane transporter activity	molecular_function	0.77645	1	13	707	568	25884
GO:0050662	coenzyme binding	molecular_function	0.77775	1	20	707	829	25884
GO:0006720	isoprenoid metabolic process	biological_process	0.7782	1	3	707	141	25884
GO:0008299	isoprenoid biosynthetic process	biological_process	0.7782	1	3	707	141	25884
GO:0005577	fibrinogen complex	cellular_component	0.77943	1	1	707	56	25884
GO:0030168	platelet activation	biological_process	0.77943	1	1	707	56	25884
GO:0006612	protein targeting to membrane	biological_process	0.77948	1	2	707	100	25884
GO:0070972	protein localization to endoplasmic reticulum	biological_process	0.78042	1	2	707	101	25884
GO:0007018	microtubule-based movement	biological_process	0.78085	1	2	707	95	25884
GO:0098687	chromosomal region	cellular_component	0.78245	1	4	707	195	25884
GO:0072686	mitotic spindle	cellular_component	0.78262	1	1	707	54	25884
GO:0044425	membrane part	cellular_component	0.7837	1	99	707	3831	25884
GO:0044877	macromolecular complex binding	molecular_function	0.78495	1	9	707	401	25884
GO:0043623	cellular protein complex assembly	biological_process	0.78522	1	6	707	283	25884
GO:0044429	mitochondrial part	cellular_component	0.78676	1	7	707	332	25884
GO:0048856	anatomical structure development	biological_process	0.78757	1	5	707	236	25884
GO:1902589	single-organism organelle organization	biological_process	0.78766	1	11	707	485	25884
GO:0010498	proteasomal protein catabolic process	biological_process	0.78832	1	1	707	54	25884
GO:0008219	cell death	biological_process	0.78891	1	2	707	105	25884
GO:0016265	death	biological_process	0.78891	1	2	707	105	25884
GO:0016151	nickel cation binding	molecular_function	0.79214	1	1	707	57	25884
GO:0000428	DNA-directed RNA polymerase complex	cellular_component	0.79392	1	2	707	110	25884
GO:0030880	RNA polymerase complex	cellular_component	0.79392	1	2	707	110	25884
GO:0055029	nuclear DNA-directed RNA polymerase complex	cellular_component	0.79392	1	2	707	110	25884
GO:0032984	macromolecular complex disassembly	biological_process	0.79438	1	1	707	58	25884
GO:0016779	nucleotidyltransferase activity	molecular_function	0.79438	1	13	707	566	25884
GO:0048518	positive regulation of biological process	biological_process	0.79474	1	5	707	239	25884
GO:0016569	covalent chromatin modification	biological_process	0.79571	1	1	707	56	25884
GO:0016570	histone modification	biological_process	0.79571	1	1	707	56	25884
GO:0010608	posttranscriptional regulation of gene expression	biological_process	0.79598	1	3	707	142	25884
GO:0006790	sulfur compound metabolic process	biological_process	0.79674	1	3	707	148	25884
GO:0005267	potassium channel activity	molecular_function	0.79717	1	1	707	57	25884
GO:0006259	DNA metabolic process	biological_process	0.79829	1	33	707	1334	25884
GO:0015078	hydrogen ion transmembrane transporter activity	molecular_function	0.79872	1	8	707	379	25884
GO:0046873	metal ion transmembrane transporter activity	molecular_function	0.79982	1	10	707	449	25884
GO:0030176	integral component of endoplasmic reticulum membrane	cellular_component	0.80054	1	1	707	57	25884
GO:0031227	intrinsic component of endoplasmic reticulum membrane	cellular_component	0.80054	1	1	707	57	25884
GO:0022411	cellular component disassembly	biological_process	0.80067	1	1	707	59	25884
GO:0008509	anion transmembrane transporter activity	molecular_function	0.80168	1	3	707	149	25884
GO:0009856	pollination	biological_process	0.80232	1	3	707	144	25884
GO:0009875	pollen-pistil interaction	biological_process	0.80232	1	3	707	144	25884
GO:0048544	recognition of pollen	biological_process	0.80232	1	3	707	144	25884
GO:0006633	fatty acid biosynthetic process	biological_process	0.80367	1	2	707	108	25884
GO:0003954	NADH dehydrogenase activity	molecular_function	0.80441	1	1	707	64	25884
GO:0016903	oxidoreductase activity, acting on the aldehyde or oxo group of donors	molecular_function	0.80453	1	2	707	106	25884
GO:0034357	photosynthetic membrane	cellular_component	0.80505	1	4	707	220	25884
GO:0008238	exopeptidase activity	molecular_function	0.8053	1	3	707	149	25884
GO:0016838	carbon-oxygen lyase activity, acting on phosphates	molecular_function	0.80558	1	1	707	58	25884
GO:1901135	carbohydrate derivative metabolic process	biological_process	0.80608	1	19	707	818	25884
GO:0098772	molecular function regulator	molecular_function	0.80636	1	14	707	638	25884
GO:0061024	membrane organization	biological_process	0.80671	1	5	707	242	25884
GO:0031399	regulation of protein modification process	biological_process	0.8075	1	1	707	60	25884
GO:0003774	motor activity	molecular_function	0.80832	1	3	707	146	25884
GO:0005126	cytokine receptor binding	molecular_function	0.80871	1	1	707	60	25884
GO:0006325	chromatin organization	biological_process	0.80907	1	5	707	248	25884
GO:0015996	chlorophyll catabolic process	biological_process	0.8092	1	1	707	61	25884
GO:0047746	chlorophyllase activity	molecular_function	0.8092	1	1	707	61	25884
GO:0042803	protein homodimerization activity	molecular_function	0.80945	1	2	707	109	25884
GO:0022891	substrate-specific transmembrane transporter activity	molecular_function	0.8104	1	30	707	1244	25884
GO:0031966	mitochondrial membrane	cellular_component	0.81174	1	6	707	297	25884
GO:0019080	viral gene expression	biological_process	0.81311	1	1	707	58	25884
GO:0008037	cell recognition	biological_process	0.81313	1	3	707	147	25884
GO:0005938	cell cortex	cellular_component	0.81358	1	2	707	106	25884
GO:0072511	divalent inorganic cation transport	biological_process	0.81399	1	3	707	156	25884
GO:0044711	single-organism biosynthetic process	biological_process	0.8142	1	37	707	1509	25884
GO:0046149	pigment catabolic process	biological_process	0.81432	1	1	707	62	25884
GO:0051302	regulation of cell division	biological_process	0.81489	1	1	707	60	25884
GO:0007596	blood coagulation	biological_process	0.81635	1	1	707	62	25884
GO:0010506	regulation of autophagy	biological_process	0.81703	1	1	707	63	25884
GO:0019899	enzyme binding	molecular_function	0.81758	1	2	707	109	25884
GO:0000103	sulfate assimilation	biological_process	0.8176	1	1	707	57	25884
GO:0004020	adenylylsulfate kinase activity	molecular_function	0.8176	1	1	707	57	25884
GO:0006402	mRNA catabolic process	biological_process	0.82064	1	1	707	60	25884
GO:0030658	transport vesicle membrane	cellular_component	0.82069	1	2	707	107	25884
GO:0051726	regulation of cell cycle	biological_process	0.82093	1	2	707	117	25884
GO:0016740	transferase activity	molecular_function	0.82104	1	145	707	5433	25884
GO:0009893	positive regulation of metabolic process	biological_process	0.82239	1	3	707	160	25884
GO:0048522	positive regulation of cellular process	biological_process	0.82257	1	4	707	205	25884
GO:0015171	amino acid transmembrane transporter activity	molecular_function	0.82706	1	1	707	61	25884
GO:0019354	siroheme biosynthetic process	biological_process	0.82822	1	1	707	60	25884
GO:0043115	precorrin-2 dehydrogenase activity	molecular_function	0.82822	1	1	707	60	25884
GO:0046156	siroheme metabolic process	biological_process	0.82822	1	1	707	60	25884
GO:0072509	divalent inorganic cation transmembrane transporter activity	molecular_function	0.82856	1	3	707	163	25884
GO:0048646	anatomical structure formation involved in morphogenesis	biological_process	0.82901	1	1	707	62	25884
GO:0038023	signaling receptor activity	molecular_function	0.82993	1	6	707	285	25884
GO:0003724	RNA helicase activity	molecular_function	0.83051	1	5	707	241	25884
GO:0046914	transition metal ion binding	molecular_function	0.83064	1	61	707	2438	25884
GO:0007599	hemostasis	biological_process	0.8311	1	1	707	65	25884
GO:0050817	coagulation	biological_process	0.8311	1	1	707	65	25884
GO:0050878	regulation of body fluid levels	biological_process	0.8311	1	1	707	65	25884
GO:0010629	negative regulation of gene expression	biological_process	0.83151	1	1	707	62	25884
GO:0044703	multi-organism reproductive process	biological_process	0.8316	1	5	707	242	25884
GO:0001775	cell activation	biological_process	0.83209	1	1	707	66	25884
GO:0016893	endonuclease activity, active with either ribo- or deoxyribonucleic acids and producing 5'-phosphomonoesters	molecular_function	0.83245	1	3	707	159	25884
GO:0006787	porphyrin-containing compound catabolic process	biological_process	0.83282	1	1	707	66	25884
GO:0033015	tetrapyrrole catabolic process	biological_process	0.83282	1	1	707	66	25884
GO:0043603	cellular amide metabolic process	biological_process	0.83342	1	23	707	1083	25884
GO:0051087	chaperone binding	molecular_function	0.83353	1	1	707	64	25884
GO:0065003	macromolecular complex assembly	biological_process	0.83389	1	9	707	431	25884
GO:0006778	porphyrin-containing compound metabolic process	biological_process	0.83436	1	3	707	163	25884
GO:0006401	RNA catabolic process	biological_process	0.83549	1	1	707	63	25884
GO:0005740	mitochondrial envelope	cellular_component	0.83603	1	6	707	308	25884
GO:0060590	ATPase regulator activity	molecular_function	0.83612	1	1	707	67	25884
GO:0008081	phosphoric diester hydrolase activity	molecular_function	0.83681	1	1	707	64	25884
GO:1901681	sulfur compound binding	molecular_function	0.83745	1	1	707	63	25884
GO:0008408	3'-5' exonuclease activity	molecular_function	0.83757	1	1	707	65	25884
GO:0030133	transport vesicle	cellular_component	0.83803	1	2	707	113	25884
GO:0033014	tetrapyrrole biosynthetic process	biological_process	0.83805	1	3	707	164	25884
GO:0033176	proton-transporting V-type ATPase complex	cellular_component	0.83947	1	2	707	117	25884
GO:0044706	multi-multicellular organism process	biological_process	0.83998	1	3	707	156	25884
GO:0017004	cytochrome complex assembly	biological_process	0.84103	1	1	707	65	25884
GO:0005096	GTPase activator activity	molecular_function	0.84328	1	1	707	63	25884
GO:0000778	condensed nuclear chromosome kinetochore	cellular_component	0.84482	1	1	707	66	25884
GO:0000780	condensed nuclear chromosome, centromeric region	cellular_component	0.84482	1	1	707	66	25884
GO:0000942	condensed nuclear chromosome outer kinetochore	cellular_component	0.84482	1	1	707	66	25884
GO:0042729	DASH complex	cellular_component	0.84482	1	1	707	66	25884
GO:0015631	tubulin binding	molecular_function	0.84517	1	4	707	210	25884
GO:0015298	solute:cation antiporter activity	molecular_function	0.8453	1	1	707	62	25884
GO:0015299	solute:proton antiporter activity	molecular_function	0.8453	1	1	707	62	25884
GO:0005576	extracellular region	cellular_component	0.84793	1	21	707	944	25884
GO:0016817	hydrolase activity, acting on acid anhydrides	molecular_function	0.84946	1	38	707	1547	25884
GO:0022607	cellular component assembly	biological_process	0.85217	1	14	707	655	25884
GO:0015081	sodium ion transmembrane transporter activity	molecular_function	0.85447	1	1	707	68	25884
GO:0016651	oxidoreductase activity, acting on NAD(P)H	molecular_function	0.8545	1	2	707	128	25884
GO:0017038	protein import	biological_process	0.85513	1	2	707	121	25884
GO:1901575	organic substance catabolic process	biological_process	0.85591	1	14	707	644	25884
GO:0000287	magnesium ion binding	molecular_function	0.85962	1	3	707	173	25884
GO:0008134	transcription factor binding	molecular_function	0.86023	1	4	707	211	25884
GO:0016866	intramolecular transferase activity	molecular_function	0.86049	1	1	707	68	25884
GO:0015103	inorganic anion transmembrane transporter activity	molecular_function	0.86054	1	1	707	68	25884
GO:0044033	multi-organism metabolic process	biological_process	0.86097	1	1	707	68	25884
GO:0015672	monovalent inorganic cation transport	biological_process	0.86129	1	12	707	564	25884
GO:0005856	cytoskeleton	cellular_component	0.862	1	6	707	312	25884
GO:0031324	negative regulation of cellular metabolic process	biological_process	0.86405	1	1	707	72	25884
GO:0032268	regulation of cellular protein metabolic process	biological_process	0.86475	1	4	707	214	25884
GO:1990234	transferase complex	cellular_component	0.8648	1	12	707	583	25884
GO:0006364	rRNA processing	biological_process	0.86512	1	2	707	128	25884
GO:0016072	rRNA metabolic process	biological_process	0.86512	1	2	707	128	25884
GO:0015994	chlorophyll metabolic process	biological_process	0.86675	1	1	707	74	25884
GO:0042060	wound healing	biological_process	0.86709	1	1	707	73	25884
GO:0044272	sulfur compound biosynthetic process	biological_process	0.86751	1	1	707	71	25884
GO:0006783	heme biosynthetic process	biological_process	0.86773	1	1	707	69	25884
GO:0005575	cellular_component	cellular_component	0.86876	1	285	707	10944	25884
GO:0004812	aminoacyl-tRNA ligase activity	molecular_function	0.86884	1	2	707	119	25884
GO:0006814	sodium ion transport	biological_process	0.87027	1	1	707	72	25884
GO:0016875	ligase activity, forming carbon-oxygen bonds	molecular_function	0.87194	1	2	707	120	25884
GO:0016876	ligase activity, forming aminoacyl-tRNA and related compounds	molecular_function	0.87194	1	2	707	120	25884
GO:0004872	receptor activity	molecular_function	0.87217	1	6	707	307	25884
GO:0022402	cell cycle process	biological_process	0.87263	1	7	707	364	25884
GO:0008017	microtubule binding	molecular_function	0.87403	1	3	707	175	25884
GO:0016655	oxidoreductase activity, acting on NAD(P)H, quinone or similar compound as acceptor	molecular_function	0.87593	1	1	707	80	25884
GO:0019898	extrinsic component of membrane	cellular_component	0.8783	1	1	707	83	25884
GO:0030120	vesicle coat	cellular_component	0.87862	1	2	707	124	25884
GO:0030135	coated vesicle	cellular_component	0.87862	1	2	707	124	25884
GO:0030659	cytoplasmic vesicle membrane	cellular_component	0.87862	1	2	707	124	25884
GO:0030662	coated vesicle membrane	cellular_component	0.87862	1	2	707	124	25884
GO:0006418	tRNA aminoacylation for protein translation	biological_process	0.87912	1	2	707	123	25884
GO:0034220	ion transmembrane transport	biological_process	0.88152	1	9	707	452	25884
GO:0098662	inorganic cation transmembrane transport	biological_process	0.88298	1	7	707	370	25884
GO:0016758	transferase activity, transferring hexosyl groups	molecular_function	0.88309	1	12	707	566	25884
GO:0042168	heme metabolic process	biological_process	0.88411	1	1	707	74	25884
GO:0098655	cation transmembrane transport	biological_process	0.88466	1	7	707	371	25884
GO:0098660	inorganic ion transmembrane transport	biological_process	0.88475	1	7	707	371	25884
GO:0043038	amino acid activation	biological_process	0.88486	1	2	707	125	25884
GO:0043039	tRNA aminoacylation	biological_process	0.88486	1	2	707	125	25884
GO:0006270	DNA replication initiation	biological_process	0.88534	1	1	707	77	25884
GO:0043226	organelle	cellular_component	0.88537	1	106	707	4360	25884
GO:0007049	cell cycle	biological_process	0.88605	1	11	707	553	25884
GO:0009611	response to wounding	biological_process	0.8861	1	1	707	83	25884
GO:0015074	DNA integration	biological_process	0.88626	1	2	707	128	25884
GO:0006518	peptide metabolic process	biological_process	0.88716	1	20	707	1009	25884
GO:0031329	regulation of cellular catabolic process	biological_process	0.88912	1	1	707	81	25884
GO:0000226	microtubule cytoskeleton organization	biological_process	0.8894	1	2	707	136	25884
GO:0044767	single-organism developmental process	biological_process	0.89023	1	8	707	418	25884
GO:0005198	structural molecule activity	molecular_function	0.89037	1	19	707	982	25884
GO:0033013	tetrapyrrole metabolic process	biological_process	0.89057	1	4	707	235	25884
GO:0006606	protein import into nucleus	biological_process	0.89184	1	1	707	79	25884
GO:0034504	protein localization to nucleus	biological_process	0.89184	1	1	707	79	25884
GO:0044744	protein targeting to nucleus	biological_process	0.89184	1	1	707	79	25884
GO:0051170	nuclear import	biological_process	0.89184	1	1	707	79	25884
GO:1902593	single-organism nuclear import	biological_process	0.89184	1	1	707	79	25884
GO:0061695	transferase complex, transferring phosphorus-containing groups	cellular_component	0.89196	1	2	707	140	25884
GO:0019318	hexose metabolic process	biological_process	0.89199	1	1	707	81	25884
GO:0071949	FAD binding	molecular_function	0.89202	1	2	707	129	25884
GO:0012506	vesicle membrane	cellular_component	0.89226	1	2	707	129	25884
GO:0051246	regulation of protein metabolic process	biological_process	0.89295	1	4	707	227	25884
GO:0000278	mitotic cell cycle	biological_process	0.89398	1	3	707	191	25884
GO:1903047	mitotic cell cycle process	biological_process	0.89398	1	3	707	191	25884
GO:0009165	nucleotide biosynthetic process	biological_process	0.89723	1	4	707	242	25884
GO:1901293	nucleoside phosphate biosynthetic process	biological_process	0.89723	1	4	707	242	25884
GO:0015988	energy coupled proton transmembrane transport, against electrochemical gradient	biological_process	0.89783	1	2	707	140	25884
GO:0015991	ATP hydrolysis coupled proton transport	biological_process	0.89783	1	2	707	140	25884
GO:0005694	chromosome	cellular_component	0.89798	1	7	707	378	25884
GO:0004930	G-protein coupled receptor activity	molecular_function	0.89905	1	1	707	80	25884
GO:0004519	endonuclease activity	molecular_function	0.89945	1	4	707	239	25884
GO:0016757	transferase activity, transferring glycosyl groups	molecular_function	0.89971	1	17	707	783	25884
GO:0031325	positive regulation of cellular metabolic process	biological_process	0.90027	1	2	707	139	25884
GO:0043933	macromolecular complex subunit organization	biological_process	0.90197	1	14	707	691	25884
GO:0015979	photosynthesis	biological_process	0.90321	1	4	707	264	25884
GO:0031967	organelle envelope	cellular_component	0.9034	1	6	707	342	25884
GO:0055086	nucleobase-containing small molecule metabolic process	biological_process	0.90468	1	9	707	478	25884
GO:0044430	cytoskeletal part	cellular_component	0.90533	1	5	707	292	25884
GO:0006397	mRNA processing	biological_process	0.90676	1	3	707	191	25884
GO:0006338	chromatin remodeling	biological_process	0.90708	1	2	707	144	25884
GO:0004518	nuclease activity	molecular_function	0.90797	1	8	707	427	25884
GO:0043229	intracellular organelle	cellular_component	0.90824	1	103	707	4293	25884
GO:0050660	flavin adenine dinucleotide binding	molecular_function	0.90856	1	5	707	279	25884
GO:0022892	substrate-specific transporter activity	molecular_function	0.90876	1	30	707	1342	25884
GO:0000940	condensed chromosome outer kinetochore	cellular_component	0.90901	1	1	707	87	25884
GO:0043436	oxoacid metabolic process	biological_process	0.90902	1	19	707	877	25884
GO:0006082	organic acid metabolic process	biological_process	0.9106	1	19	707	879	25884
GO:0044433	cytoplasmic vesicle part	cellular_component	0.91081	1	2	707	138	25884
GO:0000777	condensed chromosome kinetochore	cellular_component	0.91168	1	1	707	88	25884
GO:0000779	condensed chromosome, centromeric region	cellular_component	0.91168	1	1	707	88	25884
GO:0009579	thylakoid	cellular_component	0.91196	1	4	707	269	25884
GO:0044436	thylakoid part	cellular_component	0.91196	1	4	707	269	25884
GO:0051258	protein polymerization	biological_process	0.91206	1	1	707	89	25884
GO:0000794	condensed nuclear chromosome	cellular_component	0.91217	1	1	707	87	25884
GO:0000228	nuclear chromosome	cellular_component	0.91245	1	2	707	146	25884
GO:0051082	unfolded protein binding	molecular_function	0.91317	1	2	707	153	25884
GO:0045333	cellular respiration	biological_process	0.91423	1	2	707	148	25884
GO:0044427	chromosomal part	cellular_component	0.91453	1	5	707	300	25884
GO:0016043	cellular component organization	biological_process	0.91455	1	43	707	1871	25884
GO:0015276	ligand-gated ion channel activity	molecular_function	0.91513	1	1	707	86	25884
GO:0022834	ligand-gated channel activity	molecular_function	0.91513	1	1	707	86	25884
GO:0016568	chromatin modification	biological_process	0.91532	1	3	707	200	25884
GO:0048037	cofactor binding	molecular_function	0.91594	1	21	707	977	25884
GO:0005996	monosaccharide metabolic process	biological_process	0.91613	1	1	707	90	25884
GO:0010604	positive regulation of macromolecule metabolic process	biological_process	0.91728	1	1	707	87	25884
GO:0033365	protein localization to organelle	biological_process	0.91734	1	4	707	248	25884
GO:0061630	ubiquitin protein ligase activity	molecular_function	0.91802	1	1	707	88	25884
GO:0061659	ubiquitin-like protein ligase activity	molecular_function	0.91802	1	1	707	88	25884
GO:0010605	negative regulation of macromolecule metabolic process	biological_process	0.91955	1	1	707	89	25884
GO:0098813	nuclear chromosome segregation	biological_process	0.91995	1	1	707	90	25884
GO:0090150	establishment of protein localization to membrane	biological_process	0.92032	1	2	707	148	25884
GO:0072522	purine-containing compound biosynthetic process	biological_process	0.92076	1	3	707	208	25884
GO:0043566	structure-specific DNA binding	molecular_function	0.92148	1	2	707	150	25884
GO:0007017	microtubule-based process	biological_process	0.92235	1	4	707	251	25884
GO:0042802	identical protein binding	molecular_function	0.92266	1	2	707	147	25884
GO:0012507	ER to Golgi transport vesicle membrane	cellular_component	0.92382	1	1	707	87	25884
GO:0030127	COPII vesicle coat	cellular_component	0.92382	1	1	707	87	25884
GO:0030134	ER to Golgi transport vesicle	cellular_component	0.92382	1	1	707	87	25884
GO:0072657	protein localization to membrane	biological_process	0.92401	1	2	707	151	25884
GO:0033178	proton-transporting two-sector ATPase complex, catalytic domain	cellular_component	0.92418	1	1	707	89	25884
GO:0044802	single-organism membrane organization	biological_process	0.92433	1	3	707	205	25884
GO:0009894	regulation of catabolic process	biological_process	0.92435	1	1	707	94	25884
GO:0005488	binding	molecular_function	0.92463	1	413	707	15484	25884
GO:0070838	divalent metal ion transport	biological_process	0.92645	1	2	707	151	25884
GO:0016853	isomerase activity	molecular_function	0.92657	1	5	707	309	25884
GO:0044763	single-organism cellular process	biological_process	0.92719	1	175	707	6874	25884
GO:0009057	macromolecule catabolic process	biological_process	0.92766	1	6	707	354	25884
GO:0016874	ligase activity	molecular_function	0.92777	1	5	707	294	25884
GO:0033043	regulation of organelle organization	biological_process	0.92901	1	1	707	96	25884
GO:0044248	cellular catabolic process	biological_process	0.93145	1	13	707	684	25884
GO:0016023	cytoplasmic membrane-bounded vesicle	cellular_component	0.93187	1	2	707	150	25884
GO:0016071	mRNA metabolic process	biological_process	0.9323	1	4	707	257	25884
GO:0005667	transcription factor complex	cellular_component	0.93371	1	1	707	99	25884
GO:0016053	organic acid biosynthetic process	biological_process	0.93429	1	6	707	355	25884
GO:0046394	carboxylic acid biosynthetic process	biological_process	0.93429	1	6	707	355	25884
GO:0009110	vitamin biosynthetic process	biological_process	0.93458	1	1	707	99	25884
GO:0042364	water-soluble vitamin biosynthetic process	biological_process	0.93458	1	1	707	99	25884
GO:0033177	proton-transporting two-sector ATPase complex, proton-transporting domain	cellular_component	0.93535	1	2	707	167	25884
GO:0007005	mitochondrion organization	biological_process	0.93695	1	1	707	102	25884
GO:0098796	membrane protein complex	cellular_component	0.93797	1	19	707	956	25884
GO:0009892	negative regulation of metabolic process	biological_process	0.93846	1	1	707	101	25884
GO:0015980	energy derivation by oxidation of organic compounds	biological_process	0.93888	1	2	707	162	25884
GO:0008047	enzyme activator activity	molecular_function	0.93901	1	1	707	97	25884
GO:0031988	membrane-bounded vesicle	cellular_component	0.93979	1	2	707	155	25884
GO:0006766	vitamin metabolic process	biological_process	0.94003	1	1	707	102	25884
GO:0006767	water-soluble vitamin metabolic process	biological_process	0.94003	1	1	707	102	25884
GO:0006888	ER to Golgi vesicle-mediated transport	biological_process	0.94013	1	1	707	97	25884
GO:0016628	oxidoreductase activity, acting on the CH-CH group of donors, NAD or NADP as acceptor	molecular_function	0.94122	1	1	707	99	25884
GO:0015698	inorganic anion transport	biological_process	0.94131	1	1	707	102	25884
GO:0044707	single-multicellular organism process	biological_process	0.94133	1	7	707	418	25884
GO:0019362	pyridine nucleotide metabolic process	biological_process	0.94166	1	1	707	100	25884
GO:0046496	nicotinamide nucleotide metabolic process	biological_process	0.94166	1	1	707	100	25884
GO:0006261	DNA-dependent DNA replication	biological_process	0.94296	1	1	707	101	25884
GO:0042254	ribosome biogenesis	biological_process	0.94408	1	2	707	170	25884
GO:0006913	nucleocytoplasmic transport	biological_process	0.94472	1	1	707	103	25884
GO:0051169	nuclear transport	biological_process	0.94472	1	1	707	103	25884
GO:0005819	spindle	cellular_component	0.94479	1	1	707	104	25884
GO:0032501	multicellular organismal process	biological_process	0.94517	1	12	707	639	25884
GO:0044085	cellular component biogenesis	biological_process	0.94534	1	16	707	835	25884
GO:0031975	envelope	cellular_component	0.9454	1	6	707	378	25884
GO:0072594	establishment of protein localization to organelle	biological_process	0.94636	1	3	707	219	25884
GO:0009653	anatomical structure morphogenesis	biological_process	0.94692	1	2	707	165	25884
GO:0016829	lyase activity	molecular_function	0.94762	1	10	707	558	25884
GO:0015079	potassium ion transmembrane transporter activity	molecular_function	0.94788	1	1	707	103	25884
GO:0006511	ubiquitin-dependent protein catabolic process	biological_process	0.9492	1	2	707	170	25884
GO:1901605	alpha-amino acid metabolic process	biological_process	0.94932	1	4	707	272	25884
GO:0031410	cytoplasmic vesicle	cellular_component	0.95047	1	2	707	164	25884
GO:0019941	modification-dependent protein catabolic process	biological_process	0.95144	1	2	707	172	25884
GO:0043632	modification-dependent macromolecule catabolic process	biological_process	0.95144	1	2	707	172	25884
GO:0000152	nuclear ubiquitin ligase complex	cellular_component	0.9515	1	5	707	338	25884
GO:0005680	anaphase-promoting complex	cellular_component	0.9515	1	5	707	338	25884
GO:0031461	cullin-RING ubiquitin ligase complex	cellular_component	0.9515	1	5	707	338	25884
GO:0045259	proton-transporting ATP synthase complex	cellular_component	0.95164	1	1	707	112	25884
GO:0008652	cellular amino acid biosynthetic process	biological_process	0.9518	1	3	707	221	25884
GO:0042451	purine nucleoside biosynthetic process	biological_process	0.9523	1	2	707	177	25884
GO:0046129	purine ribonucleoside biosynthetic process	biological_process	0.9523	1	2	707	177	25884
GO:0005887	integral component of plasma membrane	cellular_component	0.95237	1	1	707	108	25884
GO:0015093	ferrous iron transmembrane transporter activity	molecular_function	0.95239	1	1	707	108	25884
GO:0015684	ferrous iron transport	biological_process	0.95239	1	1	707	108	25884
GO:0004540	ribonuclease activity	molecular_function	0.95263	1	2	707	171	25884
GO:0006996	organelle organization	biological_process	0.95373	1	23	707	1132	25884
GO:0000151	ubiquitin ligase complex	cellular_component	0.95514	1	5	707	342	25884
GO:0019752	carboxylic acid metabolic process	biological_process	0.95598	1	17	707	861	25884
GO:0031982	vesicle	cellular_component	0.95631	1	2	707	169	25884
GO:0071840	cellular component organization or biogenesis	biological_process	0.95659	1	45	707	2044	25884
GO:0031226	intrinsic component of plasma membrane	cellular_component	0.95734	1	1	707	112	25884
GO:0000793	condensed chromosome	cellular_component	0.95815	1	1	707	115	25884
GO:0044422	organelle part	cellular_component	0.9587	1	45	707	2066	25884
GO:0007275	multicellular organismal development	biological_process	0.95961	1	3	707	241	25884
GO:0008168	methyltransferase activity	molecular_function	0.95974	1	10	707	577	25884
GO:0009163	nucleoside biosynthetic process	biological_process	0.96001	1	2	707	185	25884
GO:0042455	ribonucleoside biosynthetic process	biological_process	0.96001	1	2	707	185	25884
GO:0016891	endoribonuclease activity, producing 5'-phosphomonoesters	molecular_function	0.96089	1	1	707	113	25884
GO:0009451	RNA modification	biological_process	0.9609	1	4	707	283	25884
GO:0005840	ribosome	cellular_component	0.96116	1	8	707	590	25884
GO:1901659	glycosyl compound biosynthetic process	biological_process	0.96172	1	2	707	187	25884
GO:0006721	terpenoid metabolic process	biological_process	0.96211	1	1	707	110	25884
GO:0016114	terpenoid biosynthetic process	biological_process	0.96211	1	1	707	110	25884
GO:0022613	ribonucleoprotein complex biogenesis	biological_process	0.96278	1	2	707	187	25884
GO:0044446	intracellular organelle part	cellular_component	0.96283	1	44	707	2039	25884
GO:0006826	iron ion transport	biological_process	0.96355	1	1	707	117	25884
GO:0003887	DNA-directed DNA polymerase activity	molecular_function	0.96369	1	1	707	117	25884
GO:0044454	nuclear chromosome part	cellular_component	0.96379	1	1	707	119	25884
GO:0009152	purine ribonucleotide biosynthetic process	biological_process	0.96387	1	2	707	189	25884
GO:0072524	pyridine-containing compound metabolic process	biological_process	0.96393	1	1	707	117	25884
GO:0015985	energy coupled proton transport, down electrochemical gradient	biological_process	0.9641	1	1	707	123	25884
GO:0015986	ATP synthesis coupled proton transport	biological_process	0.9641	1	1	707	123	25884
GO:0000280	nuclear division	biological_process	0.96415	1	1	707	120	25884
GO:0009260	ribonucleotide biosynthetic process	biological_process	0.9648	1	2	707	190	25884
GO:0046390	ribose phosphate biosynthetic process	biological_process	0.9648	1	2	707	190	25884
GO:0005381	iron ion transmembrane transporter activity	molecular_function	0.96553	1	1	707	119	25884
GO:0044257	cellular protein catabolic process	biological_process	0.96564	1	2	707	189	25884
GO:0051603	proteolysis involved in cellular protein catabolic process	biological_process	0.96564	1	2	707	189	25884
GO:0006412	translation	biological_process	0.96587	1	16	707	951	25884
GO:0004888	transmembrane signaling receptor activity	molecular_function	0.9661	1	2	707	179	25884
GO:0006914	autophagy	biological_process	0.96615	1	3	707	254	25884
GO:1902582	single-organism intracellular transport	biological_process	0.96667	1	9	707	544	25884
GO:1901564	organonitrogen compound metabolic process	biological_process	0.96689	1	49	707	2329	25884
GO:0005739	mitochondrion	cellular_component	0.96697	1	7	707	468	25884
GO:0030170	pyridoxal phosphate binding	molecular_function	0.96763	1	1	707	119	25884
GO:0006164	purine nucleotide biosynthetic process	biological_process	0.96866	1	2	707	195	25884
GO:0006352	DNA-templated transcription, initiation	biological_process	0.97015	1	2	707	204	25884
GO:0045182	translation regulator activity	molecular_function	0.97019	1	1	707	114	25884
GO:0006754	ATP biosynthetic process	biological_process	0.97033	1	1	707	130	25884
GO:0016469	proton-transporting two-sector ATPase complex	cellular_component	0.97048	1	3	707	256	25884
GO:0007059	chromosome segregation	biological_process	0.97089	1	1	707	127	25884
GO:0016741	transferase activity, transferring one-carbon groups	molecular_function	0.9711	1	10	707	600	25884
GO:0006605	protein targeting	biological_process	0.97197	1	3	707	251	25884
GO:0006733	oxidoreduction coenzyme metabolic process	biological_process	0.97227	1	1	707	127	25884
GO:0048285	organelle fission	biological_process	0.97232	1	1	707	130	25884
GO:1901607	alpha-amino acid biosynthetic process	biological_process	0.97248	1	2	707	190	25884
GO:0043043	peptide biosynthetic process	biological_process	0.97262	1	16	707	968	25884
GO:0044428	nuclear part	cellular_component	0.97282	1	16	707	893	25884
GO:1901566	organonitrogen compound biosynthetic process	biological_process	0.97293	1	34	707	1736	25884
GO:1902600	hydrogen ion transmembrane transport	biological_process	0.97427	1	3	707	263	25884
GO:0004521	endoribonuclease activity	molecular_function	0.9743	1	1	707	130	25884
GO:0004674	protein serine/threonine kinase activity	molecular_function	0.97439	1	4	707	298	25884
GO:0008033	tRNA processing	biological_process	0.97469	1	6	707	408	25884
GO:0043604	amide biosynthetic process	biological_process	0.97473	1	17	707	1018	25884
GO:0009056	catabolic process	biological_process	0.97475	1	16	707	892	25884
GO:0009116	nucleoside metabolic process	biological_process	0.97484	1	5	707	374	25884
GO:0003723	RNA binding	molecular_function	0.97508	1	21	707	1098	25884
GO:0016836	hydro-lyase activity	molecular_function	0.97516	1	1	707	134	25884
GO:0002949	tRNA threonylcarbamoyladenosine modification	biological_process	0.97561	1	1	707	125	25884
GO:0070525	tRNA threonylcarbamoyladenosine metabolic process	biological_process	0.97561	1	1	707	125	25884
GO:1901657	glycosyl compound metabolic process	biological_process	0.97569	1	5	707	376	25884
GO:0043234	protein complex	cellular_component	0.9761	1	52	707	2433	25884
GO:0071702	organic substance transport	biological_process	0.97635	1	29	707	1435	25884
GO:0009142	nucleoside triphosphate biosynthetic process	biological_process	0.97648	1	1	707	140	25884
GO:0009145	purine nucleoside triphosphate biosynthetic process	biological_process	0.97648	1	1	707	140	25884
GO:0009201	ribonucleoside triphosphate biosynthetic process	biological_process	0.97648	1	1	707	140	25884
GO:0009206	purine ribonucleoside triphosphate biosynthetic process	biological_process	0.97648	1	1	707	140	25884
GO:1901137	carbohydrate derivative biosynthetic process	biological_process	0.9766	1	7	707	470	25884
GO:0044265	cellular macromolecule catabolic process	biological_process	0.97691	1	3	707	264	25884
GO:0006520	cellular amino acid metabolic process	biological_process	0.97701	1	8	707	504	25884
GO:1902580	single-organism cellular localization	biological_process	0.97728	1	3	707	261	25884
GO:0043228	non-membrane-bounded organelle	cellular_component	0.97734	1	22	707	1261	25884
GO:0051128	regulation of cellular component organization	biological_process	0.9777	1	1	707	137	25884
GO:0034470	ncRNA processing	biological_process	0.9778	1	8	707	516	25884
GO:0005216	ion channel activity	molecular_function	0.97802	1	3	707	256	25884
GO:0022838	substrate-specific channel activity	molecular_function	0.97802	1	3	707	256	25884
GO:0009119	ribonucleoside metabolic process	biological_process	0.97803	1	4	707	326	25884
GO:0015267	channel activity	molecular_function	0.97849	1	3	707	257	25884
GO:0022803	passive transmembrane transporter activity	molecular_function	0.97849	1	3	707	257	25884
GO:0044283	small molecule biosynthetic process	biological_process	0.97921	1	7	707	475	25884
GO:0034061	DNA polymerase activity	molecular_function	0.97948	1	1	707	137	25884
GO:0009127	purine nucleoside monophosphate biosynthetic process	biological_process	0.98032	1	1	707	144	25884
GO:0009168	purine ribonucleoside monophosphate biosynthetic process	biological_process	0.98032	1	1	707	144	25884
GO:0009156	ribonucleoside monophosphate biosynthetic process	biological_process	0.98092	1	1	707	145	25884
GO:0070085	glycosylation	biological_process	0.98104	1	1	707	136	25884
GO:0042440	pigment metabolic process	biological_process	0.98153	1	2	707	207	25884
GO:0032940	secretion by cell	biological_process	0.98181	1	1	707	137	25884
GO:0005623	cell	cellular_component	0.98187	1	143	707	6143	25884
GO:0044464	cell part	cellular_component	0.98187	1	143	707	6143	25884
GO:0044281	small molecule metabolic process	biological_process	0.9819	1	28	707	1423	25884
GO:0030163	protein catabolic process	biological_process	0.98196	1	2	707	216	25884
GO:0009124	nucleoside monophosphate biosynthetic process	biological_process	0.98262	1	1	707	148	25884
GO:0046903	secretion	biological_process	0.98327	1	1	707	140	25884
GO:0008270	zinc ion binding	molecular_function	0.98328	1	35	707	1726	25884
GO:0003735	structural constituent of ribosome	molecular_function	0.98336	1	7	707	594	25884
GO:0016835	carbon-oxygen lyase activity	molecular_function	0.98343	1	2	707	218	25884
GO:0046148	pigment biosynthetic process	biological_process	0.98418	1	1	707	141	25884
GO:0006399	tRNA metabolic process	biological_process	0.98463	1	8	707	529	25884
GO:0022836	gated channel activity	molecular_function	0.98576	1	1	707	150	25884
GO:0072521	purine-containing compound metabolic process	biological_process	0.98601	1	4	707	348	25884
GO:0046907	intracellular transport	biological_process	0.98611	1	19	707	1046	25884
GO:0009117	nucleotide metabolic process	biological_process	0.98642	1	5	707	403	25884
GO:0034660	ncRNA metabolic process	biological_process	0.98667	1	10	707	637	25884
GO:0016482	cytoplasmic transport	biological_process	0.98717	1	4	707	340	25884
GO:0006753	nucleoside phosphate metabolic process	biological_process	0.98762	1	5	707	408	25884
GO:0043232	intracellular non-membrane-bounded organelle	cellular_component	0.98794	1	20	707	1226	25884
GO:0030117	membrane coat	cellular_component	0.98796	1	2	707	216	25884
GO:0048475	coated membrane	cellular_component	0.98796	1	2	707	216	25884
GO:0006818	hydrogen transport	biological_process	0.98813	1	3	707	297	25884
GO:0015992	proton transport	biological_process	0.98813	1	3	707	297	25884
GO:0016567	protein ubiquitination	biological_process	0.98889	1	1	707	152	25884
GO:0032446	protein modification by small protein conjugation	biological_process	0.99004	1	1	707	156	25884
GO:0098798	mitochondrial protein complex	cellular_component	0.9903	1	1	707	167	25884
GO:0034613	cellular protein localization	biological_process	0.99041	1	16	707	934	25884
GO:0070727	cellular macromolecule localization	biological_process	0.99041	1	16	707	934	25884
GO:0006091	generation of precursor metabolites and energy	biological_process	0.99045	1	3	707	307	25884
GO:0008104	protein localization	biological_process	0.99093	1	20	707	1125	25884
GO:0044455	mitochondrial membrane part	cellular_component	0.99114	1	1	707	170	25884
GO:0015630	microtubule cytoskeleton	cellular_component	0.99116	1	1	707	175	25884
GO:0006886	intracellular protein transport	biological_process	0.99179	1	14	707	850	25884
GO:0015031	protein transport	biological_process	0.99189	1	18	707	1041	25884
GO:0042278	purine nucleoside metabolic process	biological_process	0.9919	1	3	707	315	25884
GO:0046128	purine ribonucleoside metabolic process	biological_process	0.9919	1	3	707	315	25884
GO:0005622	intracellular	cellular_component	0.99406	1	124	707	5582	25884
GO:0009150	purine ribonucleotide metabolic process	biological_process	0.99408	1	3	707	329	25884
GO:0009259	ribonucleotide metabolic process	biological_process	0.99422	1	3	707	330	25884
GO:0044424	intracellular part	cellular_component	0.99427	1	120	707	5426	25884
GO:0045184	establishment of protein localization	biological_process	0.99463	1	18	707	1072	25884
GO:0051641	cellular localization	biological_process	0.99478	1	22	707	1255	25884
GO:0006163	purine nucleotide metabolic process	biological_process	0.99484	1	3	707	335	25884
GO:0051649	establishment of localization in cell	biological_process	0.99531	1	20	707	1171	25884
GO:0006457	protein folding	biological_process	0.99532	1	1	707	204	25884
GO:0019693	ribose phosphate metabolic process	biological_process	0.9959	1	3	707	345	25884
GO:0004842	ubiquitin-protein transferase activity	molecular_function	0.99625	1	6	707	515	25884
GO:0019787	ubiquitin-like protein transferase activity	molecular_function	0.99625	1	6	707	515	25884
GO:0033036	macromolecule localization	biological_process	0.99664	1	21	707	1252	25884
GO:0006400	tRNA modification	biological_process	0.9974	1	1	707	206	25884
GO:0030529	ribonucleoprotein complex	cellular_component	0.99792	1	8	707	763	25884
GO:0070647	protein modification by small protein conjugation or removal	biological_process	0.99794	1	1	707	208	25884
GO:0032991	macromolecular complex	cellular_component	0.99799	1	60	707	3138	25884
GO:0006396	RNA processing	biological_process	0.99851	1	11	707	820	25884
GO:0046034	ATP metabolic process	biological_process	0.99909	1	1	707	255	25884
GO:0009144	purine nucleoside triphosphate metabolic process	biological_process	0.99928	1	1	707	265	25884
GO:0009199	ribonucleoside triphosphate metabolic process	biological_process	0.99928	1	1	707	265	25884
GO:0009205	purine ribonucleoside triphosphate metabolic process	biological_process	0.99928	1	1	707	265	25884
GO:0009141	nucleoside triphosphate metabolic process	biological_process	0.99935	1	1	707	269	25884
GO:0044444	cytoplasmic part	cellular_component	0.99938	1	32	707	1994	25884
GO:0009126	purine nucleoside monophosphate metabolic process	biological_process	0.9994	1	1	707	269	25884
GO:0009167	purine ribonucleoside monophosphate metabolic process	biological_process	0.9994	1	1	707	269	25884
GO:0009161	ribonucleoside monophosphate metabolic process	biological_process	0.99941	1	1	707	270	25884
GO:0009123	nucleoside monophosphate metabolic process	biological_process	0.99947	1	1	707	273	25884
GO:0005737	cytoplasm	cellular_component	0.9995	1	44	707	2550	25884
GO:0016192	vesicle-mediated transport	biological_process	0.99964	1	6	707	610	25884
