# Supplementary material for: Drought stress-induced the formation of heteromorphic leaves of Populus euphratica Oliv: evidence from gene transcriptome
Source: Front Plant Sci. 2023 Jun 7;14:1194169. doi: 10.3389/fpls.2023.1194169 (PMC10282185; doi:10.3389/fpls.2023.1194169)
Supplement: Supplementary file 5 [file Table_4.xlsx]

## Sheet: lanceolate vs ovate.KEGG
Supplementary Table S4. Differential genes KEGG enrichment analysis
Terms	Database	ID	P-Value	Corrected P-Value	Input	KEGG_ID/KO
Phenylalanine, tyrosine and tryptophan biosynthesis	KEGG PATHWAY	pop00400	0.0184475	0.307738	105142785|105138012	pop:POPTR_0005s04490g|pop:POPTR_0005s04490g|
Fatty acid metabolism	KEGG PATHWAY	pop01212	0.0393704	0.307738	105127900|105112837	pop:POPTR_0002s09330g|pop:POPTR_0002s22410g|
Peroxisome	KEGG PATHWAY	pop04146	0.0490089	0.307738	105140923|105112837	pop:POPTR_0004s19580g|pop:POPTR_0002s22410g|
Folate biosynthesis	KEGG PATHWAY	pop00790	0.0656853	0.307738	105142240	pop:POPTR_0009s12200g|
One carbon pool by folate	KEGG PATHWAY	pop00670	0.0732792	0.307738	105142240	pop:POPTR_0009s12200g|
Cutin, suberine and wax biosynthesis	KEGG PATHWAY	pop00073	0.0907652	0.307738	105140923	pop:POPTR_0004s19580g|
Ether lipid metabolism	KEGG PATHWAY	pop00565	0.10793	0.307738	105125297	pop:POPTR_0015s10980g|
Propanoate metabolism	KEGG PATHWAY	pop00640	0.119996	0.307738	105127900	pop:POPTR_0002s09330g|
Biosynthesis of unsaturated fatty acids	KEGG PATHWAY	pop01040	0.131904	0.307738	105112837	pop:POPTR_0002s22410g|
alpha-Linolenic acid metabolism	KEGG PATHWAY	pop00592	0.15063	0.307738	105112837	pop:POPTR_0002s22410g|
Fatty acid degradation	KEGG PATHWAY	pop00071	0.159844	0.307738	105112837	pop:POPTR_0002s22410g|
Valine, leucine and isoleucine degradation	KEGG PATHWAY	pop00280	0.164415	0.307738	105112837	pop:POPTR_0002s22410g|
Fatty acid biosynthesis	KEGG PATHWAY	pop00061	0.166692	0.307738	105127900	pop:POPTR_0002s09330g|
Inositol phosphate metabolism	KEGG PATHWAY	pop00562	0.193541	0.331784	105125297	pop:POPTR_0015s10980g|
Starch and sucrose metabolism	KEGG PATHWAY	pop00500	0.208124	0.332998	105121543|105107801	pop:POPTR_0001s02190g|pop:POPTR_0015s14810g|
Biosynthesis of amino acids	KEGG PATHWAY	pop01230	0.230128	0.345193	105142785|105138012	pop:POPTR_0005s04490g|pop:POPTR_0005s04490g|
Pyruvate metabolism	KEGG PATHWAY	pop00620	0.279065	0.379951	105127900	pop:POPTR_0002s09330g|
Glycerophospholipid metabolism	KEGG PATHWAY	pop00564	0.284963	0.379951	105125297	pop:POPTR_0015s10980g|
RNA degradation	KEGG PATHWAY	pop03018	0.317511	0.401066	105141696	pop:POPTR_0001s34900g|
Pyrimidine metabolism	KEGG PATHWAY	pop00240	0.355728	0.426873	105142240	pop:POPTR_0009s12200g|
Amino sugar and nucleotide sugar metabolism	KEGG PATHWAY	pop00520	0.378332	0.431164	105140204	pop:POPTR_0009s14430g|
Metabolic pathways	KEGG PATHWAY	pop01100	0.395234	0.431164	105112837|105127900|105125297|105142240|105121543|105142785|105138012|105107801	pop:POPTR_0002s22410g|pop:POPTR_0002s09330g|pop:POPTR_0015s10980g|pop:POPTR_0009s12200g|pop:POPTR_0001s02190g|pop:POPTR_0005s04490g|pop:POPTR_0005s04490g|pop:POPTR_0015s14810g|
Biosynthesis of secondary metabolites	KEGG PATHWAY	pop01110	0.515439	0.537849	105140204|105142785|105138012|105112837	pop:POPTR_0009s14430g|pop:POPTR_0005s04490g|pop:POPTR_0005s04490g|pop:POPTR_0002s22410g|
Plant hormone signal transduction	KEGG PATHWAY	pop04075	0.648559	0.648559	105129841	pop:POPTR_0001s30560g|
Phenylpropanoid biosynthesis	KEGG PATHWAY	pop00940	0.000195459	0.00664561	105142785	pop:POPTR_0005s04490g

## Sheet: lanceolate vs broad-ovate.KEGG
Terms	Database	ID	P-Value	Corrected P-Value	Input	KEGG_ID/KO
Flavonoid biosynthesis	KEGG PATHWAY	pop00941	9.34043e-13	6.35149e-11	105114298|105122966|105122969|105123652|105128970|105132195|105112214|105110148|105128763|105107779|105132584|105138720|105138722|105132585|105132582|105125580	pop:POPTR_0009s07320g|pop:POPTR_0003s17550g|pop:POPTR_0003s17550g|pop:POPTR_0008s11540g|pop:POPTR_0001s08410g|pop:POPTR_0003s11900g|pop:POPTR_0014s14200g|pop:POPTR_0004s03030g|pop:POPTR_0002s03500g|pop:POPTR_0001s31220g|pop:POPTR_0001s14310g|pop:POPTR_0005s11610g|pop:POPTR_0005s11610g|pop:POPTR_0001s14310g|pop:POPTR_0001s14310g|pop:POPTR_0008s13600g|
Phenylpropanoid biosynthesis	KEGG PATHWAY	pop00940	0.000195459	0.00664561	105134799|105133370|105132927|105108525|105136386|105122873|105124486|105134837|105126277|105107779|105137114|105119449|105142552|105115311|105125580|105130758	pop:POPTR_0004s01510g|pop:POPTR_0001s17500g|pop:POPTR_0002s01990g|pop:POPTR_0009s09870g|pop:POPTR_0003s05780g|pop:POPTR_0003s18720g|pop:POPTR_0007s05100g|pop:POPTR_0004s01920g|pop:POPTR_0003s21610g|pop:POPTR_0001s31220g|pop:POPTR_0010s23100g|pop:POPTR_0005s21740g|pop:POPTR_0006s12870g|pop:POPTR_0016s09230g|pop:POPTR_0008s13600g|pop:POPTR_0008s03810g|
Circadian rhythm - plant	KEGG PATHWAY	pop04712	0.000627183	0.0142162	105122966|105110083|105122969|105112214|105132584|105132585|105132582	pop:POPTR_0003s17550g|pop:POPTR_0015s00440g|pop:POPTR_0003s17550g|pop:POPTR_0014s14200g|pop:POPTR_0001s14310g|pop:POPTR_0001s14310g|pop:POPTR_0001s14310g|
Fatty acid degradation	KEGG PATHWAY	pop00071	0.00107688	0.018307	105112837|105112268|105109661|105136841|105131178|105142449|105130263	pop:POPTR_0002s22410g|pop:POPTR_0001s26630g|pop:POPTR_0002s19330g|pop:POPTR_0011s15600g|pop:POPTR_0005s06140g|pop:POPTR_0018s08940g|pop:POPTR_0005s07930g|
Pentose and glucuronate interconversions	KEGG PATHWAY	pop00040	0.00380417	0.0460939	105110390|105142148|105142098|105112268|105125118|105136968|105142615|105136130|105111408|105136309	pop:POPTR_0022s00220g|pop:POPTR_0022s00220g|pop:POPTR_0022s00220g|pop:POPTR_0001s26630g|pop:POPTR_0013s01470g|pop:POPTR_0014s11240g|pop:POPTR_0018s12530g|pop:POPTR_0896s00200g|pop:POPTR_0006s13670g|pop:POPTR_0006s13740g|
Phenylalanine metabolism	KEGG PATHWAY	pop00360	0.0040671	0.0460939	105134799|105122873|105124486|105126277|105107779|105137114|105119449|105142552|105115311|105125580|105130758	pop:POPTR_0004s01510g|pop:POPTR_0003s18720g|pop:POPTR_0007s05100g|pop:POPTR_0003s21610g|pop:POPTR_0001s31220g|pop:POPTR_0010s23100g|pop:POPTR_0005s21740g|pop:POPTR_0006s12870g|pop:POPTR_0016s09230g|pop:POPTR_0008s13600g|pop:POPTR_0008s03810g|
Biosynthesis of secondary metabolites	KEGG PATHWAY	pop01110	0.00558182	0.0542234	105125580|105114298|105134799|105133370|105120662|105111555|105122969|105121719|105134837|105124486|105133490|105142785|105107824|105115311|105136386|105132927|105122873|105126277|105123369|105128763|105107779|105128970|105132584|105132585|105138012|105123788|105142162|105108525|105112268|105123652|105121145|105112575|105110148|105137114|105142552|105119449|105130758|105122966|105118257|105112837…	pop:POPTR_0008s13600g|pop:POPTR_0009s07320g|pop:POPTR_0004s01510g|pop:POPTR_0001s17500g|pop:POPTR_0002s13110g|pop:POPTR_0007s00320g|pop:POPTR_0003s17550g|pop:POPTR_0006s12510g|pop:POPTR_0004s01920g|pop:POPTR_0007s05100g|pop:POPTR_0017s12470g|pop:POPTR_0005s04490g|pop:POPTR_0015s15290g|pop:POPTR_0016s09230g|pop:POPTR_0003s05780g|pop:POPTR_0002s01990g|pop:POPTR_0003s18720g|pop:POPTR_0003s21610g|pop…
Starch and sucrose metabolism	KEGG PATHWAY	pop00500	0.00829605	0.0705164	105110390|105142148|105111555|105136309|105142098|105125118|105134837|105136968|105115760|105142024|105142615|105136130|105111408|105111342|105107801	pop:POPTR_0022s00220g|pop:POPTR_0022s00220g|pop:POPTR_0007s00320g|pop:POPTR_0006s13740g|pop:POPTR_0022s00220g|pop:POPTR_0013s01470g|pop:POPTR_0004s01920g|pop:POPTR_0014s11240g|pop:POPTR_0013s09030g|pop:POPTR_0015s05540g|pop:POPTR_0018s12530g|pop:POPTR_0896s00200g|pop:POPTR_0006s13670g|pop:POPTR_0003s01730g|pop:POPTR_0015s14810g|
Peroxisome	KEGG PATHWAY	pop04146	0.036927	0.279004	105129903|105118257|105112837|105131320|105137354|105109661|105130263	pop:POPTR_0010s07960g|pop:POPTR_0010s18360g|pop:POPTR_0002s22410g|pop:POPTR_0005s04590g|pop:POPTR_0016s03140g|pop:POPTR_0002s19330g|pop:POPTR_0005s07930g|
Fatty acid metabolism	KEGG PATHWAY	pop01212	0.0576217	0.373996	105112837|105127900|105109661|105112228|105142449|105130263	pop:POPTR_0002s22410g|pop:POPTR_0002s09330g|pop:POPTR_0002s19330g|pop:POPTR_0005s16540g|pop:POPTR_0018s08940g|pop:POPTR_0005s07930g|
Glutathione metabolism	KEGG PATHWAY	pop00480	0.0604993	0.373996	105118257|105130112|105122138|105130116|105115510|105115514|105117971	pop:POPTR_0010s18360g|pop:POPTR_0878s00210g|pop:POPTR_0006s23880g|pop:POPTR_0700s00200g|pop:POPTR_0002s20900g|pop:POPTR_0002s20890g|pop:POPTR_0002s20890g|
Metabolic pathways	KEGG PATHWAY	pop01100	0.0721886	0.409068	105142449|105125580|105122679|105142024|105120662|105132927|105127900|105138917|105121719|105133490|105137114|105134837|105109661|105124486|105142240|105115311|105134799|105142785|105136130|105136309|105117633|105130095|105136968|105110390|105117901|105142098|105122969|105136386|105111555|105122873|105126277|105130758|105107801|105123369|105128763|105107779|105112228|105142615|105132584|105116015…	pop:POPTR_0018s08940g|pop:POPTR_0008s13600g|pop:POPTR_0006s06100g|pop:POPTR_0015s05540g|pop:POPTR_0002s13110g|pop:POPTR_0002s01990g|pop:POPTR_0002s09330g|pop:POPTR_0009s16130g|pop:POPTR_0006s12510g|pop:POPTR_0017s12470g|pop:POPTR_0010s23100g|pop:POPTR_0004s01920g|pop:POPTR_0002s19330g|pop:POPTR_0007s05100g|pop:POPTR_0009s12200g|pop:POPTR_0016s09230g|pop:POPTR_0004s01510g|pop:POPTR_0005s04490g|pop…
Stilbenoid, diarylheptanoid and gingerol biosynthesis	KEGG PATHWAY	pop00945	0.0893877	0.448067	105125580|105107779	pop:POPTR_0008s13600g|pop:POPTR_0001s31220g|
Degradation of aromatic compounds	KEGG PATHWAY	pop01220	0.0964729	0.448067	105136841|105131178	pop:POPTR_0011s15600g|pop:POPTR_0005s06140g|
Propanoate metabolism	KEGG PATHWAY	pop00640	0.101558	0.448067	105127900|105117633|105112228	pop:POPTR_0002s09330g|pop:POPTR_0010s17730g|pop:POPTR_0005s16540g|
Phenylalanine, tyrosine and tryptophan biosynthesis	KEGG PATHWAY	pop00400	0.107271	0.448067	105142162|105142785|105138012|105133490	pop:POPTR_0021s00590g|pop:POPTR_0005s04490g|pop:POPTR_0005s04490g|pop:POPTR_0017s12470g|
Plant hormone signal transduction	KEGG PATHWAY	pop04075	0.116755	0.448067	105122798|105141461|105108710|105127627|105138309|105140275|105131725|105108598|105137421|105123728|105133608|105136325|105128606	pop:POPTR_0003s19710g|pop:POPTR_0004s17290g|pop:POPTR_0005s16020g|pop:POPTR_0006s04190g|pop:POPTR_0008s06630g|pop:POPTR_0001s17780g|pop:POPTR_0016s04010g|pop:POPTR_0019s00790g|pop:POPTR_0010s07570g|pop:POPTR_0010s11350g|pop:POPTR_0010s19840g|pop:POPTR_0006s13940g|pop:POPTR_0015s08130g|
Folate biosynthesis	KEGG PATHWAY	pop00790	0.118606	0.448067	105129246|105142240	pop:POPTR_0011s11560g|pop:POPTR_0009s12200g|
Pyruvate metabolism	KEGG PATHWAY	pop00620	0.155399	0.556163	105127900|105112268|105123788|105112575|105112228	pop:POPTR_0002s09330g|pop:POPTR_0001s26630g|pop:POPTR_0009s08520g|pop:POPTR_0010s04790g|pop:POPTR_0005s16540g|
alpha-Linolenic acid metabolism	KEGG PATHWAY	pop00592	0.169178	0.575207	105142449|105130263|105112837	pop:POPTR_0018s08940g|pop:POPTR_0005s07930g|pop:POPTR_0002s22410g|
Valine, leucine and isoleucine degradation	KEGG PATHWAY	pop00280	0.203853	0.648432	105112268|105117633|105112837	pop:POPTR_0001s26630g|pop:POPTR_0010s17730g|pop:POPTR_0002s22410g|
Fatty acid biosynthesis	KEGG PATHWAY	pop00061	0.209787	0.648432	105127900|105109661|105112228	pop:POPTR_0002s09330g|pop:POPTR_0002s19330g|pop:POPTR_0005s16540g|
beta-Alanine metabolism	KEGG PATHWAY	pop00410	0.252255	0.745798	105112268|105117633|105122138	pop:POPTR_0001s26630g|pop:POPTR_0010s17730g|pop:POPTR_0006s23880g|
Limonene and pinene degradation	KEGG PATHWAY	pop00903	0.276987	0.784796	105112268	pop:POPTR_0001s26630g|
Citrate cycle (TCA cycle)	KEGG PATHWAY	pop00020	0.308367	0.838758	105123788|105112575|105118257	pop:POPTR_0009s08520g|pop:POPTR_0010s04790g|pop:POPTR_0010s18360g|
Biosynthesis of unsaturated fatty acids	KEGG PATHWAY	pop01040	0.343131	0.873772	105130263|105112837	pop:POPTR_0005s07930g|pop:POPTR_0002s22410g|
Glycosaminoglycan degradation	KEGG PATHWAY	pop00531	0.356115	0.873772	105122679	pop:POPTR_0006s06100g|
Ascorbate and aldarate metabolism	KEGG PATHWAY	pop00053	0.359788	0.873772	105112268|105138917	pop:POPTR_0001s26630g|pop:POPTR_0009s16130g|
Zeatin biosynthesis	KEGG PATHWAY	pop00908	0.426606	0.94711	105123369	pop:POPTR_0004s09950g|
Endocytosis	KEGG PATHWAY	pop04144	0.453643	0.94711	105135554|105114060|105135543|105136160|105127530	pop:POPTR_0014s09770g|pop:POPTR_0005s18570g|pop:POPTR_0014s09770g|pop:POPTR_0006s27000g|pop:POPTR_0010s21350g|
Diterpenoid biosynthesis	KEGG PATHWAY	pop00904	0.46515	0.94711	105120662	pop:POPTR_0002s13110g|
One carbon pool by folate	KEGG PATHWAY	pop00670	0.477416	0.94711	105142240	pop:POPTR_0009s12200g|
Histidine metabolism	KEGG PATHWAY	pop00340	0.477416	0.94711	105112268	pop:POPTR_0001s26630g|
Tyrosine metabolism	KEGG PATHWAY	pop00350	0.493329	0.94711	105136841|105131178	pop:POPTR_0011s15600g|pop:POPTR_0005s06140g|
Biotin metabolism	KEGG PATHWAY	pop00780	0.501111	0.94711	105116015	pop:POPTR_0006s185902|
Arginine and proline metabolism	KEGG PATHWAY	pop00330	0.503587	0.94711	105112268|105112704|105122138	pop:POPTR_0001s26630g|pop:POPTR_0009s09420g|pop:POPTR_0006s23880g|
Sesquiterpenoid and triterpenoid biosynthesis	KEGG PATHWAY	pop00909	0.523735	0.94711	105130095	pop:POPTR_0011s14600g|
Glycolysis / Gluconeogenesis	KEGG PATHWAY	pop00010	0.529267	0.94711	105112268|105136841|105112575|105131178	pop:POPTR_0001s26630g|pop:POPTR_0011s15600g|pop:POPTR_0010s04790g|pop:POPTR_0005s06140g|
Cutin, suberine and wax biosynthesis	KEGG PATHWAY	pop00073	0.555767	0.96903	105137354	pop:POPTR_0016s03140g|
Tryptophan metabolism	KEGG PATHWAY	pop00380	0.59516	0.984263	105112268	pop:POPTR_0001s26630g|
ABC transporters	KEGG PATHWAY	pop02010	0.604452	0.984263	105133459	pop:POPTR_0017s12120g|
Lysine degradation	KEGG PATHWAY	pop00310	0.61353	0.984263	105112268	pop:POPTR_0001s26630g|
Ether lipid metabolism	KEGG PATHWAY	pop00565	0.622401	0.984263	105136160	pop:POPTR_0006s27000g|
Cysteine and methionine metabolism	KEGG PATHWAY	pop00270	0.648721	0.999528	105121719|105123788|105122138	pop:POPTR_0006s12510g|pop:POPTR_0009s08520g|pop:POPTR_0006s23880g|
Ubiquinone and other terpenoid-quinone biosynthesis	KEGG PATHWAY	pop00130	0.671522	0.999528	105122873	pop:POPTR_0003s18720g|
Glyoxylate and dicarboxylate metabolism	KEGG PATHWAY	pop00630	0.681618	0.999528	105123788|105107824	pop:POPTR_0009s08520g|pop:POPTR_0015s15290g|
Nitrogen metabolism	KEGG PATHWAY	pop00910	0.720834	0.999528	105127858	pop:POPTR_0002s08930g|
Base excision repair	KEGG PATHWAY	pop03410	0.727248	0.999528	105118177	pop:POPTR_0010s18270g|
Amino sugar and nucleotide sugar metabolism	KEGG PATHWAY	pop00520	0.7712	0.999528	105121145|105111342|105111555	pop:POPTR_0018s11990g|pop:POPTR_0003s01730g|pop:POPTR_0007s00320g|
Biosynthesis of amino acids	KEGG PATHWAY	pop01230	0.79214	0.999528	105142162|105118257|105121719|105133490|105142785|105138012	pop:POPTR_0021s00590g|pop:POPTR_0010s18360g|pop:POPTR_0006s12510g|pop:POPTR_0017s12470g|pop:POPTR_0005s04490g|pop:POPTR_0005s04490g|
Phosphatidylinositol signaling system	KEGG PATHWAY	pop04070	0.824679	0.999528	105139142	pop:POPTR_0001s25930g|
Glycerolipid metabolism	KEGG PATHWAY	pop00561	0.828712	0.999528	105112268	pop:POPTR_0001s26630g|
Cyanoamino acid metabolism	KEGG PATHWAY	pop00460	0.832654	0.999528	105134837	pop:POPTR_0004s01920g|
Inositol phosphate metabolism	KEGG PATHWAY	pop00562	0.840267	0.999528	105139142	pop:POPTR_0001s25930g|
2-Oxocarboxylic acid metabolism	KEGG PATHWAY	pop01210	0.843943	0.999528	105118257	pop:POPTR_0010s18360g|
Pyrimidine metabolism	KEGG PATHWAY	pop00240	0.888719	0.999528	105117901|105142240	pop:POPTR_0018s07020g|pop:POPTR_0009s12200g|
Glycine, serine and threonine metabolism	KEGG PATHWAY	pop00260	0.889966	0.999528	105107824	pop:POPTR_0015s15290g|
Carbon fixation in photosynthetic organisms	KEGG PATHWAY	pop00710	0.920614	0.999528	105123788	pop:POPTR_0009s08520g|
Photosynthesis	KEGG PATHWAY	pop00195	0.927688	0.999528	105125444	pop:POPTR_0010s24560g|
Glycerophospholipid metabolism	KEGG PATHWAY	pop00564	0.942744	0.999528	105136160	pop:POPTR_0006s27000g|
Phagosome	KEGG PATHWAY	pop04145	0.94785	0.999528	105136926	pop:POPTR_0006s03390g|
Carbon metabolism	KEGG PATHWAY	pop01200	0.959319	0.999528	105117633|105112575|105118257|105123788	pop:POPTR_0010s17730g|pop:POPTR_0010s04790g|pop:POPTR_0010s18360g|pop:POPTR_0009s08520g|
Oxidative phosphorylation	KEGG PATHWAY	pop00190	0.983038	0.999528	105140044	pop:POPTR_0018s03700g|
mRNA surveillance pathway	KEGG PATHWAY	pop03015	0.98419	0.999528	105134243	pop:POPTR_0005s02390g|
Ubiquitin mediated proteolysis	KEGG PATHWAY	pop04120	0.985264	0.999528	105117131	pop:POPTR_0010s02250g|
Plant-pathogen interaction	KEGG PATHWAY	pop04626	0.997473	0.999528	105123484	pop:POPTR_0005s14430g|
Spliceosome	KEGG PATHWAY	pop03040	0.998347	0.999528	105127530	pop:POPTR_0010s21350g|
Protein processing in endoplasmic reticulum	KEGG PATHWAY	pop04141	0.999528	0.999528	105127530	pop:POPTR_0010s21350g|
Protein processing in endoplasmic reticulum	KEGG PATHWAY	pop04141	105127530	pop:POPTR_0010s21350g|

## Sheet: ovate vs broad-ovate.KEGG
Terms	Database	ID	P-Value	Corrected P-Value	Input	KEGG_ID/KO
Fatty acid degradation	KEGG PATHWAY	pop00071	5.52994e-06	0.000414745	105127698|105109973|105112837|105109616|105113559|105131176|105120929|Novel00678|105131178|105139547|105130263	pop:POPTR_0002s07290g|pop:POPTR_0002s19060g|pop:POPTR_0002s22410g|pop:POPTR_0019s12240g|pop:POPTR_0014s16750g|pop:POPTR_0005s06160g|pop:POPTR_0018s13950g|pop:POPTR_0018s13950g|pop:POPTR_0005s06140g|pop:POPTR_0012s08010g|pop:POPTR_0005s07930g|
Stilbenoid, diarylheptanoid and gingerol biosynthesis	KEGG PATHWAY	pop00945	0.000531187	0.0120539	105134830|105121198|105125580|105107779|105136908	pop:POPTR_0004s01840g|pop:POPTR_0018s11370g|pop:POPTR_0008s13600g|pop:POPTR_0001s31220g|pop:POPTR_0006s03180g|
Pentose and glucuronate interconversions	KEGG PATHWAY	pop00040	0.000606414	0.0120539	105109973|105110390|105123988|105142098|105115688|105125118|105136968|105139547|105142615|105136132|105114484|105111408|105130704	pop:POPTR_0002s19060g|pop:POPTR_0022s00220g|pop:POPTR_0005s09980g|pop:POPTR_0022s00220g|pop:POPTR_0001s35960g|pop:POPTR_0013s01470g|pop:POPTR_0014s11240g|pop:POPTR_0012s08010g|pop:POPTR_0018s12530g|pop:POPTR_0896s00200g|pop:POPTR_0002s23990g|pop:POPTR_0006s13670g|pop:POPTR_0010s23570g|
Degradation of aromatic compounds	KEGG PATHWAY	pop01220	0.000642873	0.0120539	105127698|105131176|105120929|Novel00678|105131178	pop:POPTR_0002s07290g|pop:POPTR_0005s06160g|pop:POPTR_0018s13950g|pop:POPTR_0018s13950g|pop:POPTR_0005s06140g|
Plant hormone signal transduction	KEGG PATHWAY	pop04075	0.000835873	0.0125381	105120049|105134500|105108266|105120598|105120462|105134892|105133694|105127627|105125658|105129398|105127973|105138309|105131226|105131225|105108567|105137421|105123728|105133608|105112762|105140275|105140276|105114921|105109094	pop:POPTR_0014s10700g|pop:POPTR_0009s12890g|pop:POPTR_0003s05560g|pop:POPTR_0002s12450g|pop:POPTR_0002s10880g|pop:POPTR_0014s09120g|pop:POPTR_0014s07810g|pop:POPTR_0006s04190g|pop:POPTR_0008s13720g|pop:POPTR_0008s17220g|pop:POPTR_0004s04970g|pop:POPTR_0008s06630g|pop:POPTR_0005s05550g|pop:POPTR_0005s05560g|pop:POPTR_0011s05830g|pop:POPTR_0010s07570g|pop:POPTR_0010s11350g|pop:POPTR_0010s19840g|pop…
Phenylpropanoid biosynthesis	KEGG PATHWAY	pop00940	0.00151127	0.0188909	105121198|105132690|105121389|105108525|105122930|105134336|105122873|105120139|105134837|105110689|105126277|105107779|105124486|105136908|105125580|105130313	pop:POPTR_0018s11370g|pop:POPTR_0001s07400g|pop:POPTR_0008s09380g|pop:POPTR_0009s09870g|pop:POPTR_0003s17980g|pop:POPTR_0017s06570g|pop:POPTR_0003s18720g|pop:POPTR_0009s15590g|pop:POPTR_0004s01920g|pop:POPTR_0016s07910g|pop:POPTR_0003s21610g|pop:POPTR_0001s31220g|pop:POPTR_0007s05100g|pop:POPTR_0006s03180g|pop:POPTR_0008s13600g|pop:POPTR_0005s07390g|
Flavonoid biosynthesis	KEGG PATHWAY	pop00941	0.00398402	0.042686	105121198|105107779|105136908|105138720|105125580|105114941	pop:POPTR_0018s11370g|pop:POPTR_0001s31220g|pop:POPTR_0006s03180g|pop:POPTR_0005s11610g|pop:POPTR_0008s13600g|pop:POPTR_0004s14680g|
Starch and sucrose metabolism	KEGG PATHWAY	pop00500	0.00475371	0.044566	105115703|105121389|105110390|105116548|105142098|105111555|105120139|105132258|105125118|105139550|105136968|105132892|105142024|105142615|105136132|105134837|105111408|105111342	pop:POPTR_0018s07380g|pop:POPTR_0008s09380g|pop:POPTR_0022s00220g|pop:POPTR_0004s10980g|pop:POPTR_0022s00220g|pop:POPTR_0007s00320g|pop:POPTR_0009s15590g|pop:POPTR_0003s11210g|pop:POPTR_0013s01470g|pop:POPTR_0012s07990g|pop:POPTR_0014s11240g|pop:POPTR_0002s01570g|pop:POPTR_0015s05540g|pop:POPTR_0018s12530g|pop:POPTR_0896s00200g|pop:POPTR_0004s01920g|pop:POPTR_0006s13670g|pop:POPTR_0003s01730g|
Nitrogen metabolism	KEGG PATHWAY	pop00910	0.00613179	0.0510983	105123550|105127858|105128546|105116456|105110417|105112093	pop:POPTR_0019s05050g|pop:POPTR_0002s08930g|pop:POPTR_0015s08720g|pop:POPTR_0005s16180g|pop:POPTR_0012s04090g|pop:POPTR_0004s14810g|
Limonene and pinene degradation	KEGG PATHWAY	pop00903	0.00899653	0.067474	105134830|105139547|105109973	pop:POPTR_0004s01840g|pop:POPTR_0012s08010g|pop:POPTR_0002s19060g|
alpha-Linolenic acid metabolism	KEGG PATHWAY	pop00592	0.0317961	0.216792	105134953|105109616|105137488|105130263|105112837	pop:POPTR_0001s05320g|pop:POPTR_0019s12240g|pop:POPTR_0010s06720g|pop:POPTR_0005s07930g|pop:POPTR_0002s22410g|
Linoleic acid metabolism	KEGG PATHWAY	pop00591	0.0412697	0.254162	105125032|105134953|105137488	pop:POPTR_0013s02300g|pop:POPTR_0001s05320g|pop:POPTR_0010s06720g|
Diterpenoid biosynthesis	KEGG PATHWAY	pop00904	0.0451175	0.254162	105136374|105120662|105129592	pop:POPTR_0003s05610g|pop:POPTR_0002s13110g|pop:POPTR_0012s14040g|
Glycolysis / Gluconeogenesis	KEGG PATHWAY	pop00010	0.0483437	0.254162	105127698|105109973|105121382|105140681|105131176|105120929|Novel00678|105131178|105139547	pop:POPTR_0002s07290g|pop:POPTR_0002s19060g|pop:POPTR_0001s00440g|pop:POPTR_0011s07630g|pop:POPTR_0005s06160g|pop:POPTR_0018s13950g|pop:POPTR_0018s13950g|pop:POPTR_0005s06140g|pop:POPTR_0012s08010g|
Arginine and proline metabolism	KEGG PATHWAY	pop00330	0.0508325	0.254162	105109973|105123550|105116217|105122138|105114203|105110417|105139547	pop:POPTR_0002s19060g|pop:POPTR_0019s05050g|pop:POPTR_0010s02930g|pop:POPTR_0006s23880g|pop:POPTR_0010s14390g|pop:POPTR_0012s04090g|pop:POPTR_0012s08010g|
Tyrosine metabolism	KEGG PATHWAY	pop00350	0.0565274	0.264972	105127698|105131176|105120929|Novel00678|105131178	pop:POPTR_0002s07290g|pop:POPTR_0005s06160g|pop:POPTR_0018s13950g|pop:POPTR_0018s13950g|pop:POPTR_0005s06140g|
Cysteine and methionine metabolism	KEGG PATHWAY	pop00270	0.119692	0.506299	105121719|105120763|105122138|105116217|105114203|105127323|105121382	pop:POPTR_0006s12510g|pop:POPTR_0002s14270g|pop:POPTR_0006s23880g|pop:POPTR_0010s02930g|pop:POPTR_0010s14390g|pop:POPTR_0008s15570g|pop:POPTR_0001s00440g|
Ether lipid metabolism	KEGG PATHWAY	pop00565	0.121512	0.506299	105136160|105113821|105139407	pop:POPTR_0006s27000g|pop:POPTR_0003s02730g|pop:POPTR_0012s10110g|
Biosynthesis of secondary metabolites	KEGG PATHWAY	pop01110	0.134347	0.530317	105108525|105125952|105116548|105120662|105111555|105134830|105121719|105134837|105124486|105107779|105107824|105121198|105109973|105120763|105122873|105140681|105123369|Novel00678|105140204|105132690|105126277|105130313|105127698|105121389|105131176|105136908|105108666|105121382|105120139|105110689|105136994|105139547|105127323|105134336|105136374|105141670|105112837|105109333|105120929|10513117…	pop:POPTR_0009s09870g|pop:POPTR_0008s14070g|pop:POPTR_0004s10980g|pop:POPTR_0002s13110g|pop:POPTR_0007s00320g|pop:POPTR_0004s01840g|pop:POPTR_0006s12510g|pop:POPTR_0004s01920g|pop:POPTR_0007s05100g|pop:POPTR_0001s31220g|pop:POPTR_0015s15290g|pop:POPTR_0018s11370g|pop:POPTR_0002s19060g|pop:POPTR_0002s14270g|pop:POPTR_0003s18720g|pop:POPTR_0011s07630g|pop:POPTR_0004s09950g|pop:POPTR_0018s13950g|pop…
Phenylalanine metabolism	KEGG PATHWAY	pop00360	0.141645	0.53117	105134336|105132690|105122873|105124486|105126277|105107779|105125580|105130313	pop:POPTR_0017s06570g|pop:POPTR_0001s07400g|pop:POPTR_0003s18720g|pop:POPTR_0007s05100g|pop:POPTR_0003s21610g|pop:POPTR_0001s31220g|pop:POPTR_0008s13600g|pop:POPTR_0005s07390g|
beta-Alanine metabolism	KEGG PATHWAY	pop00410	0.164198	0.564982	105139547|105109973|105125952|105122138	pop:POPTR_0012s08010g|pop:POPTR_0002s19060g|pop:POPTR_0008s14070g|pop:POPTR_0006s23880g|
Glyoxylate and dicarboxylate metabolism	KEGG PATHWAY	pop00630	0.165728	0.564982	105108666|105120763|105110417|105107824|105141670	pop:POPTR_0012s14960g|pop:POPTR_0002s14270g|pop:POPTR_0012s04090g|pop:POPTR_0015s15290g|pop:POPTR_0014s15170g|
Biosynthesis of unsaturated fatty acids	KEGG PATHWAY	pop01040	0.187486	0.596415	105109616|105130263|105112837	pop:POPTR_0019s12240g|pop:POPTR_0005s07930g|pop:POPTR_0002s22410g|
Histidine metabolism	KEGG PATHWAY	pop00340	0.190853	0.596415	105139547|105109973	pop:POPTR_0012s08010g|pop:POPTR_0002s19060g|
Ascorbate and aldarate metabolism	KEGG PATHWAY	pop00053	0.201648	0.604944	105139547|105109973|105138917	pop:POPTR_0012s08010g|pop:POPTR_0002s19060g|pop:POPTR_0009s16130g|
Base excision repair	KEGG PATHWAY	pop03410	0.21605	0.623221	105118177|105124122|105117079	pop:POPTR_0010s18270g|pop:POPTR_0003s15520g|pop:POPTR_0008s08050g|
Pyruvate metabolism	KEGG PATHWAY	pop00620	0.259361	0.711133	105139547|105124900|105121382|105109973|105120763	pop:POPTR_0012s08010g|pop:POPTR_0002s15740g|pop:POPTR_0001s00440g|pop:POPTR_0002s19060g|pop:POPTR_0002s14270g|
Glycerophospholipid metabolism	KEGG PATHWAY	pop00564	0.275214	0.711133	105136160|105113821|105133385|105136398|105139407	pop:POPTR_0006s27000g|pop:POPTR_0003s02730g|pop:POPTR_0001s17360g|pop:POPTR_0003s05900g|pop:POPTR_0012s10110g|
Valine, leucine and isoleucine degradation	KEGG PATHWAY	pop00280	0.290539	0.711133	105139547|105109973|105112837	pop:POPTR_0012s08010g|pop:POPTR_0002s19060g|pop:POPTR_0002s22410g|
Endocytosis	KEGG PATHWAY	pop04144	0.295313	0.711133	105136160|105135543|105113821|105141073|105114060|105142788|105135554	pop:POPTR_0006s27000g|pop:POPTR_0014s09770g|pop:POPTR_0003s02730g|pop:POPTR_0010s25270g|pop:POPTR_0005s18570g|pop:POPTR_0008s07070g|pop:POPTR_0014s09770g|
Tryptophan metabolism	KEGG PATHWAY	pop00380	0.303868	0.711133	105139547|105109973	pop:POPTR_0012s08010g|pop:POPTR_0002s19060g|
Vitamin B6 metabolism	KEGG PATHWAY	pop00750	0.305655	0.711133	105114744	pop:POPTR_0018s05070g|
Peroxisome	KEGG PATHWAY	pop04146	0.312898	0.711133	105109616|105137354|105113559|105130263|105112837	pop:POPTR_0019s12240g|pop:POPTR_0016s03140g|pop:POPTR_0014s16750g|pop:POPTR_0005s07930g|pop:POPTR_0002s22410g|
Lysine degradation	KEGG PATHWAY	pop00310	0.324362	0.715504	105139547|105109973	pop:POPTR_0012s08010g|pop:POPTR_0002s19060g|
Alanine, aspartate and glutamate metabolism	KEGG PATHWAY	pop00250	0.336156	0.715543	105123550|105125952|105110417	pop:POPTR_0019s05050g|pop:POPTR_0008s14070g|pop:POPTR_0012s04090g|
Taurine and hypotaurine metabolism	KEGG PATHWAY	pop00430	0.343568	0.715543	105125952	pop:POPTR_0008s14070g|
Metabolic pathways	KEGG PATHWAY	pop01100	0.364108	0.715543	105134953|105131646|105125952|105122679|105120662|105116217|105134830|105138917|105121719|105132892|105134837|105139550|105124486|105136132|105139407|105121198|105109973|105110390|105117901|105142098|105120763|105111555|105122873|105140681|105123369|105114203|Novel00678|105107779|105142615|105124900|105111408|105122138|105130313|105127698|105121389|105109616|105123550|105136908|105108525|10511382…	pop:POPTR_0001s05320g|pop:POPTR_0008s01000g|pop:POPTR_0008s14070g|pop:POPTR_0006s06100g|pop:POPTR_0002s13110g|pop:POPTR_0010s02930g|pop:POPTR_0004s01840g|pop:POPTR_0009s16130g|pop:POPTR_0006s12510g|pop:POPTR_0002s01570g|pop:POPTR_0004s01920g|pop:POPTR_0012s07990g|pop:POPTR_0007s05100g|pop:POPTR_0896s00200g|pop:POPTR_0012s10110g|pop:POPTR_0018s11370g|pop:POPTR_0002s19060g|pop:POPTR_0022s00220g|pop…
Glycerolipid metabolism	KEGG PATHWAY	pop00561	0.366521	0.715543	105139547|105109973|105123988	pop:POPTR_0012s08010g|pop:POPTR_0002s19060g|pop:POPTR_0005s09980g|
Cyanoamino acid metabolism	KEGG PATHWAY	pop00460	0.374081	0.715543	105121389|105120139|105134837	pop:POPTR_0008s09380g|pop:POPTR_0009s15590g|pop:POPTR_0004s01920g|
Galactose metabolism	KEGG PATHWAY	pop00052	0.381623	0.715543	105123988|105140869|105132258	pop:POPTR_0005s09980g|pop:POPTR_0015s09330g|pop:POPTR_0003s11210g|
Ubiquinone and other terpenoid-quinone biosynthesis	KEGG PATHWAY	pop00130	0.394566	0.720889	105122873|105132690	pop:POPTR_0003s18720g|pop:POPTR_0001s07400g|
Fatty acid metabolism	KEGG PATHWAY	pop01212	0.412672	0.720889	105109616|105113559|105130263|105112837	pop:POPTR_0019s12240g|pop:POPTR_0014s16750g|pop:POPTR_0005s07930g|pop:POPTR_0002s22410g|
Glycosaminoglycan degradation	KEGG PATHWAY	pop00531	0.41331	0.720889	105122679	pop:POPTR_0006s06100g|
Zeatin biosynthesis	KEGG PATHWAY	pop00908	0.490184	0.835541	105123369	pop:POPTR_0004s09950g|
Glycine, serine and threonine metabolism	KEGG PATHWAY	pop00260	0.505083	0.841805	105108666|105131646|105107824	pop:POPTR_0012s14960g|pop:POPTR_0008s01000g|pop:POPTR_0015s15290g|
Butanoate metabolism	KEGG PATHWAY	pop00650	0.531396	0.852561	105125952	pop:POPTR_0008s14070g|
Nicotinate and nicotinamide metabolism	KEGG PATHWAY	pop00760	0.544381	0.852561	105136369	pop:POPTR_0002s18620g|
Amino sugar and nucleotide sugar metabolism	KEGG PATHWAY	pop00520	0.549243	0.852561	105116548|105140214|105140204|105111342|105111555	pop:POPTR_0004s10980g|pop:POPTR_0009s14420g|pop:POPTR_0009s14430g|pop:POPTR_0003s01730g|pop:POPTR_0007s00320g|
Other glycan degradation	KEGG PATHWAY	pop00511	0.557007	0.852561	105137573	pop:POPTR_0015s14140g|
Cutin, suberine and wax biosynthesis	KEGG PATHWAY	pop00073	0.62576	0.938641	105137354	pop:POPTR_0016s03140g|
ABC transporters	KEGG PATHWAY	pop02010	0.674848	0.980147	105114250	pop:POPTR_0017s11030g|
Citrate cycle (TCA cycle)	KEGG PATHWAY	pop00020	0.679569	0.980147	105120763|105141670	pop:POPTR_0002s14270g|pop:POPTR_0014s15170g|
Propanoate metabolism	KEGG PATHWAY	pop00640	0.732968	0.992832	105121382	pop:POPTR_0001s00440g|
Sulfur metabolism	KEGG PATHWAY	pop00920	0.761397	0.992832	105138765	pop:POPTR_0011s04470g|
Carotenoid biosynthesis	KEGG PATHWAY	pop00906	0.761397	0.992832	105109333	pop:POPTR_0001s23620g|
Glutathione metabolism	KEGG PATHWAY	pop00480	0.780841	0.992832	105122138|105115514|105117971	pop:POPTR_0006s23880g|pop:POPTR_0002s20890g|pop:POPTR_0002s20890g|
Circadian rhythm - plant	KEGG PATHWAY	pop04712	0.804076	0.992832	105120049	pop:POPTR_0014s10700g|
Carbon fixation in photosynthetic organisms	KEGG PATHWAY	pop00710	0.812347	0.992832	105124900|105120763	pop:POPTR_0002s15740g|pop:POPTR_0002s14270g|
Fatty acid biosynthesis	KEGG PATHWAY	pop00061	0.847951	0.992832	105113559	pop:POPTR_0014s16750g|
Plant-pathogen interaction	KEGG PATHWAY	pop04626	0.849854	0.992832	105138179|105108212|105138200|105123484|105132916	pop:POPTR_0001s415402|pop:POPTR_0012s03780g|pop:POPTR_0016s06590g|pop:POPTR_0005s14430g|pop:POPTR_0002s01850g|
Fructose and mannose metabolism	KEGG PATHWAY	pop00051	0.867935	0.992832	105123988	pop:POPTR_0005s09980g|
Phosphatidylinositol signaling system	KEGG PATHWAY	pop04070	0.878645	0.992832	105108212	pop:POPTR_0012s03780g|
Inositol phosphate metabolism	KEGG PATHWAY	pop00562	0.891589	0.992832	105139407	pop:POPTR_0012s10110g|
2-Oxocarboxylic acid metabolism	KEGG PATHWAY	pop01210	0.894603	0.992832	105141670	pop:POPTR_0014s15170g|
Terpenoid backbone biosynthesis	KEGG PATHWAY	pop00900	0.908468	0.992832	105136994	pop:POPTR_0004s21830g|
Carbon metabolism	KEGG PATHWAY	pop01200	0.923927	0.992832	105131646|105141670|105120763|105120929|Novel00678|105124900	pop:POPTR_0008s01000g|pop:POPTR_0014s15170g|pop:POPTR_0002s14270g|pop:POPTR_0018s13950g|pop:POPTR_0018s13950g|pop:POPTR_0002s15740g|
Pyrimidine metabolism	KEGG PATHWAY	pop00240	0.941324	0.992832	105123145|105117901	pop:POPTR_0003s15650g|pop:POPTR_0018s07020g|
Photosynthesis	KEGG PATHWAY	pop00195	0.958489	0.992832	105136276	pop:POPTR_0001s47450g|
mRNA surveillance pathway	KEGG PATHWAY	pop03015	0.960613	0.992832	105115623|105134243	pop:POPTR_0018s06320g|pop:POPTR_0005s02390g|
Ubiquitin mediated proteolysis	KEGG PATHWAY	pop04120	0.963316	0.992832	105126134|105141221	pop:POPTR_0003s21560g|pop:POPTR_0004s18090g|
Phagosome	KEGG PATHWAY	pop04145	0.972061	0.992832	105114752	pop:POPTR_0015s04560g|
RNA degradation	KEGG PATHWAY	pop03018	0.980663	0.992832	105137034	pop:POPTR_0004s22240g|
Protein processing in endoplasmic reticulum	KEGG PATHWAY	pop04141	0.982662	0.992832	105142373|105114122|105141221|105137833	pop:POPTR_0001s44190g|pop:POPTR_0009s02100g|pop:POPTR_0004s18090g|pop:POPTR_0009s02650g|
Biosynthesis of amino acids	KEGG PATHWAY	pop01230	0.984979	0.992832	105131646|105110417|105121719|105141670	pop:POPTR_0008s01000g|pop:POPTR_0012s04090g|pop:POPTR_0006s12510g|pop:POPTR_0014s15170g|
Oxidative phosphorylation	KEGG PATHWAY	pop00190	0.992832	0.992832	105140044	pop:POPTR_0018s03700g|
